# Supplementary material for: Triple burden of malnutrition among mother–child pairs in low-income and middle-income countries: a cross-sectional study
Source: PubMed Central journal article supplement — BMJ Open. 2023 May 9;13(5):e070978. doi: 10.1136/bmjopen-2022-070978 (PMC10174032; doi:10.1136/bmjopen-2022-070978), 2023-05-09
Supplement: bmjopen-2022-070978.draft_revisions.pdf [file bmjopen-2022-070978.draft_revisions.pdf]

# BMJ Open

BMJ Open is committed to open peer review. As part of this commitment we make the peer review history of every article we publish publicly available.

When an article is published we post the peer reviewers' comments and the authors' responses online. We also post the versions of the paper that were used during peer review. These are the versions that the peer review comments apply to.

The versions of the paper that follow are the versions that were submitted during the peer review process. They are not the versions of record or the final published versions. They should not be cited or distributed as the published version of this manuscript.

BMJ Open is an open access journal and the full, final, typeset and author-corrected version of record of the manuscript is available on our site with no access controls, subscription charges or pay-per-view fees (<http://bmjopen.bmj.com>).

If you have any questions on BMJ Open's open peer review process please email [info.bmjopen@bmj.com](mailto:info.bmjopen@bmj.com)

# BMJ Open

## Triple burden of malnutrition among mother-child pairs in low and middle-income countries: In the era of sustainable development goals

|                               |                                                                                                                                                                                                                                                                                                                                                                                                                                                                                                                                                                                                               |
|-------------------------------|---------------------------------------------------------------------------------------------------------------------------------------------------------------------------------------------------------------------------------------------------------------------------------------------------------------------------------------------------------------------------------------------------------------------------------------------------------------------------------------------------------------------------------------------------------------------------------------------------------------|
| Journal:                      | <i>BMJ Open</i>                                                                                                                                                                                                                                                                                                                                                                                                                                                                                                                                                                                               |
| Manuscript ID                 | bmjopen-2022-070978                                                                                                                                                                                                                                                                                                                                                                                                                                                                                                                                                                                           |
| Article Type:                 | Original research                                                                                                                                                                                                                                                                                                                                                                                                                                                                                                                                                                                             |
| Date Submitted by the Author: | 10-Dec-2022                                                                                                                                                                                                                                                                                                                                                                                                                                                                                                                                                                                                   |
| Complete List of Authors:     | Chilot, Dagmawi; University of Gondar College of Medicine and Health Sciences, Department of Human Physiology<br>Belay, Daniel; University of Gondar College of Medicine and Health Sciences, Epidemiology<br>Merid, Mehari ; University of Gondar, Department of Epidemiology and Biostatistics<br>Kibret, Anteneh; University of Gondar, Human anatomy<br>Alem, Adugnaw ; University of Gondar College of Medicine and Health Sciences, Epidemiology and Bio statistics<br>Asratie, Melaku; University of Gondar,<br>Aragaw, Fantu Mamo; University of Gondar, Department of Epidemiology and Biostatistics |
| Keywords:                     | NUTRITION & DIETETICS, EPIDEMIOLOGY, PUBLIC HEALTH, Health policy < HEALTH SERVICES ADMINISTRATION & MANAGEMENT, Community child health < PAEDIATRICS                                                                                                                                                                                                                                                                                                                                                                                                                                                         |
|                               |                                                                                                                                                                                                                                                                                                                                                                                                                                                                                                                                                                                                               |

SCHOLARONE™  
Manuscripts

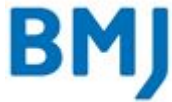

I, the Submitting Author has the right to grant and does grant on behalf of all authors of the Work (as defined in the below author licence), an exclusive licence and/or a non-exclusive licence for contributions from authors who are: i) UK Crown employees; ii) where BMJ has agreed a CC-BY licence shall apply, and/or iii) in accordance with the terms applicable for US Federal Government officers or employees acting as part of their official duties; on a worldwide, perpetual, irrevocable, royalty-free basis to BMJ Publishing Group Ltd ("BMJ") its licensees and where the relevant Journal is co-owned by BMJ to the co-owners of the Journal, to publish the Work in this journal and any other BMJ products and to exploit all rights, as set out in our [licence](#).

The Submitting Author accepts and understands that any supply made under these terms is made by BMJ to the Submitting Author unless you are acting as an employee on behalf of your employer or a postgraduate student of an affiliated institution which is paying any applicable article publishing charge ("APC") for Open Access articles. Where the Submitting Author wishes to make the Work available on an Open Access basis (and intends to pay the relevant APC), the terms of reuse of such Open Access shall be governed by a Creative Commons licence – details of these licences and which [Creative Commons](#) licence will apply to this Work are set out in our licence referred to above.

Other than as permitted in any relevant BMJ Author's Self Archiving Policies, I confirm this Work has not been accepted for publication elsewhere, is not being considered for publication elsewhere and does not duplicate material already published. I confirm all authors consent to publication of this Work and authorise the granting of this licence.

1  
2  
3  
4  
5  
6  
7  
8  
9  
10  
11  
12  
13  
14  
15  
16  
17  
18  
19  
20  
21  
22  
23  
24  
25  
26  
27  
28  
29  
30  
31  
32  
33  
34  
35  
36  
37  
38  
39  
40  
41  
42  
43  
44  
45  
46  
47  
48  
49  
50  
51  
52  
53  
54  
55  
56  
57  
58  
59  
60

## 1 **Triple burden of malnutrition among mother-child pairs in low and** 2 **middle-income countries: In the era of sustainable development goals**

3  
4 Dagmawi Chilot\*<sup>1</sup>, Daniel Gashaneh Belay<sup>3,4</sup>, Mehari Woldemariam Merid<sup>4</sup>, Anteneh Ayelign  
5 Kibret<sup>3</sup>, Adugnaw Zeleke Alem<sup>4</sup>, Melaku Hunie Asratie<sup>5</sup>, and Fantu Mamo Aragaw<sup>4</sup>  
6

7 <sup>1</sup>Department of Human Physiology, University of Gondar, College of Medicine and Health  
8 Science, School of Medicine, Gondar, Ethiopia;

9 <sup>3</sup>Department of Human Anatomy, University of Gondar, College of Medicine and Health Science,  
10 School of Medicine, Gondar, Ethiopia;

11 <sup>4</sup>Department of Epidemiology & Biostatistics, University of Gondar, College of Medicine and  
12 Health Science, Institute of Public Health, Gondar, Ethiopia;

13 <sup>5</sup>Department of women and family health, University of Gondar, College of Medicine and Health  
14 Science, School of Midwifery, Gondar, Ethiopia;  
15  
16

17 Correspondence: Dagmawi Chilot: dagimchilot21@gmail.com. <sup>1</sup>Department of Human  
18 Physiology, University of Gondar, College of Medicine and Health Sciences, University of  
19 Gondar, P.O. Box 196, Gondar, Ethiopia,  
20  
21  
22  
23  
24  
25  
26  
27  
28  
29  
30  
31  
32  
33  
34  
35  
36  
37  
38  
39  
40  
41  
42  
43  
44  
45  
46  
47  
48  
49  
50  
51  
52  
53  
54  
55  
56  
57  
58  
59  
60

## 29 Abstract

30 **Objective:** This study aimed to assess the prevalence and determinants of the triple burden of  
31 malnutrition among mother-child pairs in low-and middle-income countries.

32 **Design:** Cross-Sectional Study

33 **Setting:** Low-and middle-income countries

34 **Participants:** Women and children

35 **Primary outcome:** Triple burden of malnutrition

36 **Methods:** Data for this study were drawn from recent 22 low and middle-income countries  
37 Demographic and Health Surveys (DHSs). A total weighted sample of 116,795 mother-child pairs  
38 was included in the study. STATA version 14.2 was used to clean, code and analyze the data.  
39 Multilevel logistic regression was employed to identify factors associated with the problem.  
40 Adjusted odds ratio with 95% CI and a P value <0.05 was reported to indicate statistical  
41 association. Model fitness and comparison were done using ICC, MOR, PCV, and deviance.

42 **Result:** The pooled prevalence of the triple burden of malnutrition among mother-child pairs was  
43 11.39%. It showed statistically significant positive associations with mothers aged  $\geq 35$  years  
44 (AOR=2.25,95%CI 2.08-2.44), family size >10 (AOR=1.17,95%CI 1.08-1.26), delivery by CS  
45 (AOR=1.93,95%CI 1.83-2.03), the richest household (AOR=1.72,95%CI 1.56-1.88), grand  
46 multiparous (AOR=1.62, 95% CI 1.46-1.81), age of child 36-47 months (AOR=1.77, 95% CI 1.64-  
47 1.90), at a p-value of <0.05. Whereas breastfeeding (AOR=0.94,95%CI 0.89-0.99), married  
48 mothers (AOR=0.87,95%CI 0.78-0.96), female children (AOR=0.88,95%CI 0.84-0.92), improved  
49 toilet (AOR=0.23,95%CI 0.17-0.29), improved source of drinking water (AOR=0.28,95%CI 0.21-  
50 0.35), rural residents (AOR=0.66,95%CI 0.62-0.69) had a contrasting relationship with the triple  
51 burden of malnutrition

1  
2  
3 52 **Conclusions:** About 1 out of 10 households suffer from the triple burden of malnutrition in low  
4  
5 53 and middle-income countries. This study revealed that several maternal, child, household, and  
6  
7 54 community-level factors have a significant impact on the triple burden of malnutrition among  
8  
9 55 mother-child pairs. Prevention of the problem requires collective efforts from the governments,  
10  
11 56 the scientific and medical communities, and the industry towards changing dietary and lifestyle  
12  
13 57 habits.  
14  
15  
16

17 58 **Keywords:** Triple burden, mother-child pairs, malnutrition, low and middle-income countries.  
18  
19  
20

### 21 59 **Strengths and limitations of this study**

- 22  
23 60 ➤ The findings were supported by large datasets covering 22 LMICs.  
24  
25 61 ➤ We employed multilevel analysis which is an appropriate methodology for such data  
26  
27 62 ➤ The data were collected using a common internationally acceptable methodological procedure.  
28  
29 63 ➤ DHS used a cross-sectional survey design, and the causal relationship between the triple  
30  
31 64 burden of malnutrition and the independent variables cannot be established.  
32  
33 65 ➤ We didn't include important covariates such as dietary intake, physical activity level, or  
34  
35 66 comorbidities as the DHS did not collect information on these variables  
36  
37  
38  
39  
40  
41  
42  
43  
44  
45  
46  
47  
48  
49  
50  
51  
52  
53  
54  
55  
56  
57  
58  
59  
60

## 73 **Background**

74 The triple burden of malnutrition, defined as the coexistence of overnutrition, undernutrition, and  
75 micronutrient deficiencies is increasing in low and middle-income countries (LMICs) (1). The  
76 World Health Organization (WHO) characterized overnutrition (Obesity and overweight) as a  
77 pandemic of a major public health concern due to the increased frequency of the problem in many  
78 countries (2). It is ranked as the sixth leading cause of disability-adjusted life years (DALYs) and  
79 accounts for approximately 4 million people dying each year worldwide (3-5). Several previous  
80 studies have shown, following marked dietary change that obesity/overweight is increasing more  
81 rapidly in low and middle-income countries compared to higher-income countries (6, 7).

82 Similarly, undernutrition continues to be a major public health concern throughout the developing  
83 world (8, 9). Nearly half of all deaths in children under 5 are attributable to undernutrition and it  
84 encompasses wasting, stunting, underweight, and micronutrient deficiencies (anemia) (10, 11).  
85 Despite stunting having declined steadily, faster progress is needed to reach the 2030 target (12,  
86 13). Wasting and underweight persisting at alarming rates require a reversal in trajectory if the  
87 2030 target is to be achieved (14). Since 2000, a significant reduction in the prevalence of anemia  
88 in children under five has been observed in many low- and lower-middle-income countries (15).  
89 Children are more vulnerable to inadequate pre-natal, infant, and young child nutrition, particularly  
90 in resource-constrained settings (16, 17). Endorsing early childhood feeding best practices is  
91 crucial to improve the health of children (18).

92 Malnutrition has a tremendous negative impact on the normal functioning of every organ system  
93 (19). It can cause permanent, widespread damage to a child's growth, development, and well-being  
94 (20). Scientific evidence has shown that malnutrition in children is associated with poorer school  
95 performance, increased susceptibility to infections, and slow recovery from illness (21, 22).

1  
2  
3 96 Maternal malnutrition increases the risk of poor pregnancy outcomes including obstructed labor,  
4  
5 97 premature or low-birth-weight babies, and postpartum hemorrhage (23, 24). To reduce the problem  
6  
7 98 the United Nations (UN) adopted the Sustainable Development Goals (SDGs), especially those  
8  
9 99 targeted to end poverty in all its forms everywhere (SDG 1), end hunger, achieve food security,  
10  
11 100 improve nutrition, promote sustainable agriculture (SDG 2), ensure healthy lives, and promote  
12  
13 101 well-being for all at all ages (SDG 3) (25, 26).  
14

15  
16  
17 102 Previous literature recognizes the basic and underlying causes of malnutrition including the  
18  
19 103 environmental, economic, and sociopolitical contextual factors, with poverty having a central role  
20  
21 104 (11, 27-29). Given the persistent and high levels of triple burden of malnutrition among mother-  
22  
23 105 child pairs in low and middle-income countries, there is a strong need for action. To design and  
24  
25 106 deliver effective interventions adequate understanding of the socioeconomic, environmental, and  
26  
27 107 cultural factors is highly important. Besides if the SDG targets are to be met, coordinated action is  
28  
29 108 required toward not only sustaining current rates of decline but also accelerating progress.  
30  
31 109 Therefore, the objective of this study was to assess the prevalence of the triple burden of  
32  
33 110 malnutrition among mothers and children and the potential factors associated with it in low and  
34  
35 111 middle-income countries.  
36  
37  
38  
39  
40

## 41 **Materials and methods**

### 42 **Study design, setting, and period**

43  
44 113 The present study is based on 22 low and middle-income countries that have had Demographic  
45  
46 114 and Health Surveys (DHS) since 2016. The DHS used a cross-sectional survey study design to  
47  
48 115 collect data and provide population and health indicators at the national level. The list of those  
49  
50 116 countries and the respective year of surveys is provided in Table 1.  
51  
52  
53  
54  
55  
56  
57



118 Table 1. Study setting and year of surveys

| Country      | Year of survey | Region              |
|--------------|----------------|---------------------|
| Albania      | 2017/18        | Southeastern Europe |
| Benin        | 2017/18        | West Africa         |
| Burundi      | 2016/17        | East-central Africa |
| Cameroon     | 2018           | West-central Africa |
| Ethiopia     | 2016           | East Africa         |
| Gambia       | 2019/20        | West Africa         |
| Guinea       | 2018           | West Africa         |
| Haiti        | 2016/17        | Caribbean           |
| India        | 2019/21        | South Asia          |
| Liberia      | 2019/20        | West Africa         |
| Madagascar   | 2021           | East Africa         |
| Mali         | 2018           | West Africa         |
| Mauritania   | 2019/21        | Northwest Africa    |
| Maldives     | 2016/17        | South Asia          |
| Nigeria      | 2018           | West Africa         |
| Nepal        | 2016           | South Asia          |
| Rwanda       | 2019/20        | East Africa         |
| Sierra Leone | 2019           | West Africa         |
| Tajikistan   | 2017           | Central Asia        |
| Timor Leste  | 2016           | South Asia          |
| Uganda       | 2016           | East Africa         |
| South Africa | 2016           | South Africa        |

119

### 120 Data source and sampling procedure

121 The current analyses was based on pooled data from DHSs in 22 LMICs. These are nationally  
 122 representative surveys that collect data on reproductive, maternal, neonatal, child health, and  
 123 nutrition in LMIC. The surveys are similarly designed that used standardized questionnaires and  
 124 data collection procedures, allowing therefore comparability of results. The survey employed a  
 125 two-stage cluster sampling technique. In the first stage, the selection of proportional  
 126 clusters/enumeration areas was performed using each country's most recent population and  
 127 housing census as a sampling frame. In the second stage, a systematic selection of households from  
 128 the newly created cluster was performed. A detailed description of the DHS sampling design and

1  
2  
3 129 data collection procedures has been found in each country's DHS report. The study population for  
4  
5 130 this study was mother-child pairs.  
6  
7

## 8 131 **Definition of variables**

### 9 10 132 **Outcome variable:**

11  
12  
13 133 The triple burden of malnutrition was the outcome variable of this study where the mother was  
14  
15 134 overweight/obese and children under 5 years of age were undernourished and anemic. At the same  
16  
17 135 household level, first, we created four different categories of malnutrition such as  
18  
19 136 overweight/obese mother and stunted child, overweight/obese mother and wasted child,  
20  
21 137 overweight/obese mother and underweight child, and overweight/obese mother and anemic child.  
22  
23 138 Then we further combined overweight/obese mothers, undernourished children, and anemic  
24  
25 139 children to generate the triple burden of malnutrition.  
26  
27  
28

### 29 140 **Independent variables:**

30  
31 141 Based on previous works of literature and the likelihood of influencing the outcome of interest,  
32  
33 142 several explanatory variables including the age of mothers, mother's education, marital status,  
34  
35 143 current breastfeeding, delivery by cesarean section, family size, wealth index, media access, parity,  
36  
37 144 age of the child, sex of the child, type of toilet facility, source of drinking water, residence and  
38  
39 145 distance to health facility were considered.  
40  
41  
42

## 43 146 **Statistical analyses**

44  
45 147 We append the dataset of each country to generate pooled data. The data extraction, coding, and  
46  
47 148 analysis were carried out using STATA software version 14.2. We weighted the sample to restore  
48  
49 149 the representativeness of the sample so that the total sample looks like the country's actual  
50  
51 150 population. Due to the hierarchical nature of the DHS, the multilevel analysis was fitted to identify  
52  
53 151 significantly associated factors. Four models were fitted; the null model (with no predictors), the  
54  
55  
56  
57  
58  
59  
60

1  
2  
3 152 model I (adjusted for individual-level variables only), model II (adjusted for community-level  
4  
5 153 variables only), and model III (model adjustment for both individual and community-level  
6  
7 154 variables simultaneously). Adjusted OR (AOR) with 95% CI and  $p < 0.05$  were used to determine  
8  
9 155 significant predictors. Model fitness and comparison were done using Intraclass Correlation  
10  
11 156 Coefficient (ICC), Proportional Change in Variance (PCV), Median Odds Ratio (MOR), the  
12  
13  
14 157 Likelihood Ratio test (LR), and deviance computed.

### 158 **Patient and public involvement statement**

159 As our study used secondary analysis of DHS data, participants and the public were not involved  
160 in the study design or planning of the study. The study participants were not consulted to interpret  
161 the results and write or editing of this document for readability or accuracy.

### 162 **Results**

163 A total of 116,795 mother-child pairs were included in the study. Over half (56.48%) of mothers  
164 were in the age category of 25-34 years. About 22.98% of mothers were illiterate and the majority  
165 (46.39%) had attended secondary education. Approximately 95.73% of mothers were married and  
166 62.89% were currently breastfeeding. About 20.33% and 21.21% of the households were in the  
167 low wealth quintile of poorest and poorer respectively. Over a quarter (27.62%) of the families  
168 had never been exposed to any type of media. The majority of the children (32.59%) were aged  
169  $\leq 12$  months. A large proportion (83.60%) of the households had improved sources of drinking  
170 water and almost two-thirds (67.02%) of the households had improved toilet facilities. Almost  
171 three fourth (71.03%) of participants lived in rural areas and for over a quarter (27.42%) of those  
172 participants, the distance to access health facilities was a big problem (**Table 2**).

173 Table 2. Socio-demographic characteristics of the study participants

| Variables                    | Categories        | Unweighted frequency (%) | Weighted frequency (%) |
|------------------------------|-------------------|--------------------------|------------------------|
| Age of mothers               | 15-24             | 34,983 (29.05)           | 35,918 (30.75)         |
|                              | 25-34             | 68,386 (56.78)           | 65,971 (56.48)         |
|                              | ≥35               | 17,073 (14.18)           | 14,906 (12.76)         |
| Mothers education            | No education      | 27,995 (23.24)           | 26,845 (22.98)         |
|                              | Primary education | 19,684 (16.34)           | 18,633 (15.95)         |
|                              | Secondary         | 57,008 (47.33)           | 54,185 (46.39)         |
|                              | Higher            | 15,755 (13.08)           | 17,131 (14.67)         |
| Mothers marital status       | Not in union      | 5,583 (4.64)             | 4,987 (4.27)           |
|                              | Married           | 114,859 (95.36)          | 111,807 (95.73)        |
| Currently breastfeeding      | No                | 44,160 (36.66)           | 43,338 (37.11)         |
|                              | Yes               | 76,282 (63.34)           | 73,457 (62.89)         |
| Delivery by cesarean section | No                | 99,291 (82.49)           | 93,974 (80.51)         |
|                              | Yes               | 21,077 (17.51)           | 22,748 (19.49)         |
| Family size                  | ≤5                | 56,365 (46.80)           | 53,677 (45.96)         |
|                              | 6-10              | 54,605 (45.34)           | 53,258 (45.60)         |
|                              | >10               | 9,472 (7.86)             | 9,859 (8.44)           |
| Wealth index                 | Poorest           | 28,097 (23.33)           | 23,749 (20.33)         |
|                              | Poorer            | 27,352 (22.71)           | 24,774 (21.21)         |
|                              | Middle            | 24,741 (20.54)           | 24,330 (20.83)         |
|                              | Richer            | 22,180 (18.42)           | 23,880 (20.45)         |
|                              | Richest           | 18,072 (15.00)           | 20,061 (17.18)         |
| Media access                 | No                | 33,942 (28.18)           | 32,256 (27.62)         |
|                              | Yes               | 86,500 (71.82)           | 84,539 (72.38)         |
| Parity                       | Primiparous       | 36,241 (30.09)           | 35,333 (30.25)         |
|                              | Multiparous       | 76,092 (63.18)           | 73,823 (63.21)         |
|                              | Grand Multiparous | 8,109 (6.73)             | 7,639 (6.54)           |
| Age of child                 | ≤12               | 38,959 (32.35)           | 38,059 (32.59)         |
|                              | 13-23             | 25,382 (21.07)           | 24,819 (21.25)         |
|                              | 24-35             | 22,208 (18.44)           | 21,478 (18.39)         |
|                              | 36-47             | 17,948 (14.90)           | 17,204 (14.73)         |
|                              | 48-59             | 15,945 (13.24)           | 15,234 (13.04)         |
| Sex of child                 | Male              | 63,660 (52.86)           | 62,008 (53.09)         |
|                              | Female            | 56,782 (47.14)           | 54,787 (46.91)         |
| Type of toilet facility      | Unimproved        | 37,519 (31.15)           | 38,518 (32.98)         |
|                              | Improved          | 82,923 (68.85)           | 78,277 (67.02)         |
| Source of drinking water     | Unimproved        | 20,959 (17.40)           | 19,159 (16.40)         |
|                              | Improved          | 99,483 (82.60)           | 97,636 (83.60)         |
| Residence                    | Urban             | 28,722 (23.85)           | 33,838 (28.97)         |
|                              | Rural             | 91,720 (76.15)           | 82,957 (71.03)         |
| Distance to health facility  | No problem        | 84,605 (70.25)           | 84,776 (72.58)         |
|                              | Big problem       | 35,837 (29.75)           | 32,019 (27.42)         |

174

175 **Prevalence of triple burden of malnutrition**

1  
2  
3 176 In 22 low and middle-income countries, the pooled prevalence of the triple burden of malnutrition  
4  
5 177 among mother-child pairs was found at 11.39 % (95% CI 9.56%, 13.23%). Ethiopia has the lowest  
6  
7 178 (3.54 %) prevalence of triple burden while Mauritania (31.66%) bears the highest (**Figure 1**).

9  
10  
11 179 Fig 1. The pooled prevalence of the triple burden of malnutrition  
12  
13

## 14 180 **Multilevel analyses**

### 15 16 17 181 **Random parameter estimation and model selection**

18  
19 182 Based on the result of random effect analysis, the ICC of the null model was 0.30, indicating that  
20  
21 183 30% of the total variability in triple burden prevalence was attributable to between-cluster  
22  
23 184 variability, while about 70% was due to individual differences. The null model MOR was 3.04,  
24  
25 185 which indicates that a mother/child from a cluster with a high triple burden prevalence has a 3.04  
26  
27 186 times higher probability of being malnourished than a mother/child from a cluster with a lower  
28  
29 187 prevalence. Model III was the best-fitted model since it has the highest log likelihood (-91665)  
30  
31 188 and the lowest deviance (183,330) value (**Table 3**).

### 32 33 34 35 36 189 **Factors associated with the triple burden of malnutrition (Fixed effects)**

37  
38 190 The existence of triple burden of malnutrition showed statistically significant positive associations  
39  
40 191 with mothers aged 25-34 years (AOR=1.54, 95% CI 1.45 - 1.63),  $\geq 35$  years (AOR=2.25, 95% CI  
41  
42 192 2.08 - 2.44), mothers attended secondary education (AOR=1.08, 95% CI 1.02-1.15), family size  
43  
44 193  $>10$  (AOR=1.17, 95% CI 1.08 - 1.26), delivery by CS (AOR=1.93, 95% CI 1.83 - 2.03), the richer  
45  
46 194 household (AOR=1.63, 95% CI 1.49 - 1.76), the richest household (AOR=1.72, 95% CI 1.56 -  
47  
48 195 1.88), multiparous (AOR=1.42, 95% CI 1.34 - 1.49), grand multiparous (AOR=1.62, 95% CI 1.46  
49  
50 196 - 1.81), age of child 36-47 months (AOR=1.77, 95% CI 1.64 - 1.90), age of child 48-59  
51  
52 197 (AOR=1.51, 95% CI 1.39 - 1.64), at a p-value of  $<0.05$ . Whereas breastfeeding (AOR=0.94, 95%  
53  
54  
55  
56  
57  
58  
59  
60

198 CI 0.89 - 0.99), married mothers (AOR=0.87, 95% CI 0.78 - 0.96), female children (AOR=0.88,  
 199 95% CI 0.84 - 0.92), improved toilet facility (AOR=0.23, 95% CI 0.17 - 0.29), improved source  
 200 of drinking water (AOR=0.28, 95% CI 0.21 - 0.35), rural residents (AOR=0.66, 95% CI 0.62 -  
 201 0.69) showed a contrasting relationship with the triple burden of malnutrition (**Table 3**).

202  
 203 Table 3. Multivariable multilevel logistic regression analysis of the triple burden of malnutrition.

| Variables                | Categories        | Null model | Model I<br>AOR 95% CI | Model II<br>AOR 95% CI | Model III<br>AOR 95% CI |
|--------------------------|-------------------|------------|-----------------------|------------------------|-------------------------|
| Age of mothers           | 15-24             | 1.00       |                       |                        | 1.00                    |
|                          | 25-34             |            | 1.54 (1.46 - 1.63)**  | —                      | 1.54 (1.45 - 1.63)**    |
|                          | ≥35               |            | 2.28 (2.11 - 2.47)**  | —                      | 2.25 (2.08 - 2.44)**    |
| Mothers education        | No education      | 1.00       |                       |                        | 1.00                    |
|                          | Primary education |            | 1.04 (0.97 - 1.12)    | —                      | 1.04 (0.97 - 1.12)      |
|                          | Secondary         |            | 1.08 (1.01 - 1.15)*   | —                      | 1.08 (1.02 - 1.15)*     |
|                          | Higher            |            | 0.94 (0.86 - 1.02)    | —                      | 0.94 (0.86 - 1.02)      |
| Mothers marital status   | Not in union      | 1.00       |                       |                        | 1.00                    |
|                          | Married           |            | 0.83 (0.75 - 0.93)*   | —                      | 0.87 (0.78 - 0.96)**    |
| Currently breast feeding | No                | 1.00       |                       |                        | 1.00                    |
|                          | Yes               |            | 0.92 (0.87 - 0.97)*   | —                      | 0.94 (0.89 - 0.99)*     |
| Delivery by CS           | No                | 1.00       |                       |                        | 1.00                    |
|                          | Yes               |            | 1.94 (1.84 - 2.04)**  | —                      | 1.93 (1.83 - 2.03)**    |
| Family size              | ≤5                | 1.00       |                       |                        | 1.00                    |
|                          | 6-10              |            | 1.00 (0.97 - 1.08)    | —                      | 1.01 (0.98 - 1.08)      |
|                          | >10               |            | 1.14 (1.06 - 1.24)**  | —                      | 1.17 (1.08 - 1.26)**    |
| Wealth index             | Poorest           | 1.00       |                       |                        | 1.00                    |
|                          | Poorer            |            | 1.41 (1.31 - 1.52)**  | —                      | 1.38 (1.28 - 1.49)**    |
|                          | Middle            |            | 1.60 (1.48 - 1.73)**  | —                      | 1.49 (1.38 - 1.62)**    |
|                          | Richer            |            | 1.86 (1.72 - 2.02)**  | —                      | 1.63 (1.49 - 1.76)**    |
|                          | Richest           |            | 2.15 (1.97 - 2.35)**  | —                      | 1.72 (1.56 - 1.88)**    |
| Media access             | No                | 1.00       |                       |                        | 1.00                    |
|                          | Yes               |            | 1.01 (0.98 - 1.08)    | —                      | 1.02 (0.99 - 1.11)      |
| Parity                   | Primiparous       | 1.00       |                       |                        | 1.00                    |
|                          | Multiparous       |            | 1.42 (1.34 - 1.50)**  | —                      | 1.42 (1.34 - 1.49)**    |
|                          | Grand Multiparous |            | 1.61 (1.44 - 1.79)**  | —                      | 1.62 (1.46 - 1.81)**    |
| Age of child             | ≤12               | 1.00       |                       |                        | 1.00                    |
|                          | 13-23             |            | 1.41 (1.32 - 1.50)**  | —                      | 1.41 (1.32 - 1.50)**    |
|                          | 24-35             |            | 1.62 (1.52 - 1.73)**  | —                      | 1.63 (1.53 - 1.74)**    |
|                          | 36-47             |            | 1.75 (1.62 - 1.89)**  | —                      | 1.77 (1.64 - 1.90)**    |
|                          | 48-59             |            | 1.50 (1.38 - 1.62)**  | —                      | 1.51 (1.39 - 1.64)**    |

|                                  |                      |                      |                      |                      |
|----------------------------------|----------------------|----------------------|----------------------|----------------------|
| Sex of child                     | Male                 | 1.00                 |                      | 1.00                 |
|                                  | Female               | 0.88 (0.84 - 0.92)** | —                    | 0.88 (0.84 - 0.92)** |
| Type of toilet facility          | Unimproved           | 1.00                 |                      | 1.00                 |
|                                  | Improved             | 0.24 (0.18 - 1.31)   | —                    | 0.23 (0.17 - 0.29)** |
| Source of drinking water         | Unimproved           | 1.00                 |                      | 1.00                 |
|                                  | Improved             | 0.21 (0.16 - 0.28)   | —                    | 0.28 (0.21 - 0.35)** |
| <b>Community-level variables</b> |                      |                      |                      |                      |
| Residence                        | Urban                |                      | 1.00                 | 1.00                 |
|                                  | Rural                | —                    | 0.49 (0.46 - 0.52)** | 0.66 (0.62 - 0.69)** |
| Distance to health facility      | No problem           |                      | 1.00                 | 1.00                 |
|                                  | Big problem          | —                    | 0.87 (0.82 - 0.91)** | 0.94 (0.89 - 0.98)** |
| <b>Random effect</b>             |                      |                      |                      |                      |
|                                  | Variance             | 1.40                 | 1.24                 | 1.31                 |
|                                  | ICC                  | 0.30                 | 0.27                 | 0.28                 |
|                                  | MOR                  | 3.04                 | 2.88                 | 2.96                 |
|                                  | PCV                  | Reff                 | 11.42                | 6.43                 |
| <b>Model comparison</b>          |                      |                      |                      |                      |
|                                  | Log likelihood ratio | -100585              | -92108               | -97815               |
|                                  | Deviance             | 201,170              | 184,216              | 195,630              |

\* = P-value < 0.05, \*\* = P-value < 0.01,

ICC = Inter cluster correlation coefficient, MOR =Median odds ratio, PCV = proportional change in variance.

AOR=adjusted odds ratio; CI= confidence interval,

204

## 205 Discussion

206 Low and middle-income countries are increasingly facing the triple burden of malnutrition where  
 207 women and children are among the hardest hit by the burden (30, 31). The present study examined  
 208 the co-occurrence of undernutrition, overweight/obesity, and anemia among mother-child pairs in  
 209 the same household using nationally representative data. The finding showed that the prevalence  
 210 of triple burden found at 11.39 % (95% CI 9.56%, 13.23%), Ethiopia has the lowest (3.54 %)   
 211 prevalence while Mauritania (31.66%) bears the highest. The variation among countries could be  
 212 attributed to differences in socio-economic status, food environment, physical activity, genetic  
 213 factors, health care system strength, national policy, and political commitments.

214 This study revealed that several maternal, child, household, and community-level factors have a  
 215 significant impact on the triple burden of malnutrition among mother-child pairs. It has found a

1  
2  
3 216 parallel correlation between the triple burden of malnutrition and maternal age. The odds of being  
4  
5 217 malnourished increase as the age of the mother increases where older mothers bear the highest risk  
6  
7 218 compared to younger ones. Various findings (32, 33) have revealed that older women have an  
8  
9 219 increased risk of malnutrition, this could be because of reduced physical activity, less energy  
10  
11 220 requirement, and hormonal changes. Similarly, mothers who attended secondary education were  
12  
13 221 more likely to be malnourished (33). A plausible explanation for this could be the shifts from  
14  
15 222 manual labor to more sedentary occupations and the related decline in physical activity.  
16  
17  
18  
19

20 223 Being married reduced the risk of the triple burden of malnutrition. Partners together could  
21  
22 224 generate more money, reduce food insecurity, and tend to take better care of themselves and their  
23  
24 225 children. It is been reported that children in single-parent households suffered from undernutrition  
25  
26 226 significantly more than children brought up by both parents (34, 35). Likewise, this study revealed  
27  
28 227 breastfeeding reduced the triple burden of malnutrition. Breastfeeding plays a vital role in the  
29  
30 228 prevention of different forms of childhood malnutrition (36). Delivery by cesarean section (C-  
31  
32 229 section) delays the timely initiation of breastfeeding and prelacteal feeding (37). Previous studies  
33  
34 230 have reported that C-section increases maternal obesity and negatively affects the breastfeeding of  
35  
36 231 children, which results suffer from malnutrition (38, 39). Moreover, malnutrition in children is  
37  
38 232 related to gut microbiota alteration and C-section contributes to microbial alterations in the small  
39  
40 233 intestine (40).  
41  
42  
43  
44  
45

46 234 Our study revealed a parallel relationship between the household wealth quintiles and the triple  
47  
48 235 burden of malnutrition. As household income increases, the odds of malnutrition increase (41, 42).  
49  
50 236 High income could increase the purchasing power for food, influencing the type of foods  
51  
52 237 consumed and the intake of prepared or processed food (30). Economic growth and the food  
53  
54 238 industry's rapid penetration into the market have resulted in diets based on energy-dense and  
55  
56  
57  
58  
59  
60



239 nutrient-poor foods (43). In recent years, the dietary preference in LMICs has changed as the food  
240 environment is dominated by media advertising and relatively cheap and highly tasty energy-dense  
241 foods (44).

242 This study identified that the odds of triple burden of malnutrition were higher in a household with  
243 a family size >10. A plausible explanation is that in a household with a large family, providing  
244 optimum nutritious food to all the family members and children could be difficult (45, 46).  
245 Moreover giving proper care and time to children and the family could be unlikely and this could  
246 lead to malnutrition. Likewise, Parity was found a determinant of the triple burden of malnutrition.  
247 Higher parity increased the odds of malnutrition. The possible explanation could be that women  
248 gain weight during pregnancy, and weight loss does not occur in the post-partum period (47). This  
249 mother's obesity/overweight is also correlated with child malnutrition.

250 The present study revealed that child age and sex were significant factors in malnutrition. Older  
251 under-five children were more likely to be malnourished compared to younger ones (48). A  
252 previous study (49) revealed that there was an increased frequency of parasite infection in older  
253 children leads to a higher prevalence of malnutrition compared to the younger ones. In addition,  
254 gender was found a significant determinant of malnutrition where a female child was less likely to  
255 be malnourished (50). The cause of the gender gap in malnutrition is unknown however, some  
256 studies argued that male children are known to be more vulnerable than females to diseases  
257 including lower respiratory infections, diarrhoeal diseases, malaria, and preterm birth. Those  
258 problems have been reported as factors for undernutrition among young male children (51, 52).  
259 Others also claimed that boys are more vulnerable to environmental problems while playing, such  
260 as exposure to toxins and air pollution than girls (53).

1  
2  
3 261 Being rural residents was associated with lower odds of the triple burden of malnutrition. This  
4  
5 262 urban-rural difference could be attributable to factors including access to different food types,  
6  
7 263 overcrowding and concurrent disease, physical activity, and sedentary lifestyles. Previous studies  
8  
9  
10 264 depicted that urbanization affects the way of life, and access to processed and junk foods could  
11  
12 265 exacerbate malnutrition among women and children (42, 54).  
13  
14

15 266 Our study has some strengths and limitations. It used large nationally representative samples with  
16  
17 267 appropriate statistical modeling. The use of large nationally representative data and multilevel  
18  
19 268 analysis helps to provide more robust estimates of observed associations as well as enhance the  
20  
21 269 generalizability of the results. Despite the strengths, this study used cross-sectional data, which  
22  
23 270 did not indicate a temporal relationship between the factors and triple burden. No important  
24  
25 271 covariates, such as dietary intake, physical activity level, comorbidities, and nutrition status during  
26  
27 272 pregnancy, were incorporated into the study as the DHS did not provide a complete record of these  
28  
29 273 variables.  
30  
31  
32  
33

## 34 274 **Conclusions and recommendations**

35  
36  
37 275 About 1 out of 10 households suffer from the triple burden of malnutrition in low and middle-  
38  
39 276 income countries. This study revealed that several maternal, child, household, and community-  
40  
41 277 level factors have a significant impact on the triple burden of malnutrition among mother-child  
42  
43 278 pairs. Prevention of the problem requires collective efforts from the governments, the scientific  
44  
45 279 and medical communities, and the industry towards changing dietary and lifestyle habits.  
46  
47  
48

## 49 280 **Abbreviations**

50  
51 281 AOR, Adjusted Odds Ratio; DHSs, Demographic and Health Surveys; ICC, Intra cluster  
52  
53 282 correlation coefficient; LMICs, low and middle-income countries; MOR, median odds ratio; PCV,  
54  
55  
56  
57  
58  
59  
60

283 a proportional change in variance; SDGs, Sustainable Development Goals; WHO, World Health  
284 Organization

## 285 **Declarations**

### 286 **Ethics approval and consent to participate**

287 Permission to access the data was obtained from the measure DHS program  
288 (<http://www.dhsprogram.com>) via online request. The website and the data used were publicly  
289 available with no personal identifier. All methods were carried out in accordance with relevant  
290 guidelines and regulations.

### 291 **Consent for publication**

292 Not applicable.

### 293 **Availability of data and materials**

294 Data are available online in a public, open-access repository ([www.measuredhs.com/data](http://www.measuredhs.com/data)).

### 295 **Competing interests**

296 The authors declare that they have no competing interests.

### 297 **Funding**

298 No funder.

### 299 **Author Contributions**

300 Conceptualization: DC. Study design: DC, DGB, MWM, AAK, AZA, MHA, FMA. Execution:  
301 DC, DGB, MWM, AAK, AZA, MHA, FMA. Acquisition of the data: DC, DGB, MWM, AAK,  
302 AZA, MHA, FMA. Analysis and interpretation: DC, DGB, MWM, AAK, AZA, MHA, FMA.

1  
2  
3 303 Writing: DC, DGB, MWM, AAK, AZA, MHA, FMA. Review and editing: DC, DGB, MWM,  
4  
5 304 AAK, AZA, MHA, FMA.  
6  
7

## 8 305 **Acknowledgments**

9  
10 306 The authors acknowledge the Measure DHS for providing us with the data set.  
11  
12  
13 307

## 15 308 **References**

- 17 309 1. Meenakshi J. Trends and patterns in the triple burden of malnutrition in India.  
18 310 *Agricultural Economics*. 2016;47(S1):115-34.  
19 311 2. Hepatology TLG. Obesity: another ongoing pandemic. 2021. p. 411.  
20 312 3. Organization WH. Diet, nutrition, and the prevention of chronic diseases: report of a joint  
21 313 WHO/FAO expert consultation: World Health Organization; 2003.  
22 314 4. Tabarés Seisdedos R. Health effects of overweight and obesity in 195 countries over 25  
23 315 years. *New England Journal of Medicine*, 2017, vol 377, num 1, p 13-27. 2017.  
24 316 5. Dai H, Alsalhe TA, Chalghaf N, Riccò M, Bragazzi NL, Wu J. The global burden of  
25 317 disease attributable to high body mass index in 195 countries and territories, 1990–2017: An  
26 318 analysis of the Global Burden of Disease Study. *PLoS medicine*. 2020;17(7):e1003198.  
27 319 6. Ford ND, Patel SA, Narayan KV. Obesity in low-and middle-income countries: burden,  
28 320 drivers, and emerging challenges. *Annual review of public health*. 2017;38:145-64.  
29 321 7. Mahumud RA, Sahle BW, Owusu-Addo E, Chen W, Morton RL, Renzaho A.  
30 322 Association of dietary intake, physical activity, and sedentary behaviours with overweight and  
31 323 obesity among 282,213 adolescents in 89 low and middle income to high-income countries.  
32 324 *International Journal of Obesity*. 2021;45(11):2404-18.  
33 325 8. Heidkamp RA, Piwoz E, Gillespie S, Keats EC, D'Alimonte MR, Menon P, et al.  
34 326 Mobilising evidence, data, and resources to achieve global maternal and child undernutrition  
35 327 targets and the Sustainable Development Goals: an agenda for action. *The Lancet*.  
36 328 2021;397(10282):1400-18.  
37 329 9. Osendarp S, Akuoku JK, Black RE, Headey D, Ruel M, Scott N, et al. The COVID-19  
38 330 crisis will exacerbate maternal and child undernutrition and child mortality in low-and middle-  
39 331 income countries. *Nature Food*. 2021;2(7):476-84.  
40 332 10. World Health Organisation Fact Sheets—Malnutrition. Available online:  
41 333 <https://www.who.int/news-room/fact-sheets/detail/malnutrition> (accessed on 26 Nov 2022).  
42 334 11. Adepoju AA, Allen S. Malnutrition in developing countries: nutrition disorders, a leading  
43 335 cause of ill health in the world today. *Paediatrics and Child Health*. 2019;29(9):394-400.  
44 336 12. Sunguya BF, Zhu S, Mpembeni R, Huang J. Trends in prevalence and determinants of  
45 337 stunting in Tanzania: an analysis of Tanzania demographic health surveys (1991–2016).  
46 338 *Nutrition Journal*. 2019;18(1):1-13.  
47 339 13. Yang YY, Kaddu G, Ngendahimana D, Barkoukis H, Freedman D, Lubaale YA, et al.  
48 340 Trends and determinants of stunting among under-5s: evidence from the 1995, 2001, 2006 and  
49 341 2011 Uganda Demographic and Health Surveys. *Public health nutrition*. 2018;21(16):2915-28.  
50  
51  
52  
53  
54  
55  
56  
57  
58  
59  
60

- 1  
2  
3 342 14. Singh KJ, Chiero V, Kriina M, Alee NT, Chauhan K. Identifying the trend of persistent  
4 343 cluster of stunting, wasting, and underweight among children under five years in northeastern  
5 344 states of India. *Clinical Epidemiology and Global Health*. 2022;18:101158.
- 6 345 15. Organization. WH. WHO Global Anaemia Estimates, 2021 Edition. Anaemia in Women  
7 346 and Children. Available online: [https://www.who.](https://www.who.int/data/gho/data/themes/topics/anaemia_in_women_and_children)  
8 347 [int/data/gho/data/themes/topics/anaemia\\_in\\_women\\_and\\_children](https://www.who.int/data/gho/data/themes/topics/anaemia_in_women_and_children) (accessed on 1 December  
9 348 2022).
- 10 349 16. Koli HB, Nair MG, Shah MC. Impact of structured pre-natal counselling on early  
11 350 initiation of breast feeding and adherence to exclusive breast feeding: a comparative  
12 351 interventional study. *International Journal of Reproduction, Contraception, Obstetrics and*  
13 352 *Gynecology*. 2021;10(7):2699-704.
- 14 353 17. Scott N, Delpont D, Hainsworth S, Pearson R, Morgan C, Huang S, et al. Ending  
15 354 malnutrition in all its forms requires scaling up proven nutrition interventions and much more: a  
16 355 129-country analysis. *BMC medicine*. 2020;18(1):1-19.
- 17 356 18. Mistry SK, Hossain M, Arora A. Maternal nutrition counselling is associated with  
18 357 reduced stunting prevalence and improved feeding practices in early childhood: a post-program  
19 358 comparison study. *Nutrition Journal*. 2019;18(1):1-9.
- 20 359 19. Norman K, Haß U, Pirlich M. Malnutrition in older adults—recent advances and  
21 360 remaining challenges. *Nutrients*. 2021;13(8):2764.
- 22 361 20. Forgie AJ, Drall KM, Bourque SL, Field CJ, Kozyrskyj AL, Willing BP. The impact of  
23 362 maternal and early life malnutrition on health: a diet-microbe perspective. *BMC medicine*.  
24 363 2020;18(1):1-15.
- 25 364 21. Kirolos A, Goyheneix M, Eliaszk MK, Chisala M, Lissauer S, Gladstone M, et al.  
26 365 Neurodevelopmental, cognitive, behavioural and mental health impairments following childhood  
27 366 malnutrition: a systematic review. *BMJ global health*. 2022;7(7):e009330.
- 28 367 22. Walson JL, Berkley JA. The impact of malnutrition on childhood infections. *Current*  
29 368 *opinion in infectious diseases*. 2018;31(3):231.
- 30 369 23. Castro-Rodríguez DC, Rodríguez-González GL, Menjivar M, Zambrano E. Maternal  
31 370 interventions to prevent adverse fetal programming outcomes due to maternal malnutrition:  
32 371 Evidence in animal models. *Placenta*. 2020;102:49-54.
- 33 372 24. Desyibelew HD, Dadi AF. Burden and determinants of malnutrition among pregnant  
34 373 women in Africa: A systematic review and meta-analysis. *PloS one*. 2019;14(9):e0221712.
- 35 374 25. Sachs JD, Schmidt-Traub G, Mazzucato M, Messner D, Nakicenovic N, Rockström J. Six  
36 375 transformations to achieve the sustainable development goals. *Nature sustainability*.  
37 376 2019;2(9):805-14.
- 38 377 26. Fonseca LM, Domingues JP, Dima AM. Mapping the sustainable development goals  
39 378 relationships. *Sustainability*. 2020;12(8):3359.
- 40 379 27. Siddiqui F, Salam RA, Lassi ZS, Das JK. The intertwined relationship between  
41 380 malnutrition and poverty. *Frontiers in Public Health*. 2020;8:453.
- 42 381 28. Rah JH, Melse-Boonstra A, Agustina R, van Zutphen KG, Kraemer K. The Triple Burden  
43 382 of Malnutrition Among Adolescents in Indonesia. SAGE Publications Sage CA: Los Angeles,  
44 383 CA; 2021. p. S4-S8.
- 45 384 29. Luo H, Zyba SJ, Webb P. Measuring malnutrition in all its forms: An update of the net  
46 385 state of nutrition index to track the global burden of malnutrition at country level. *Global Food*  
47 386 *Security*. 2020;26:100453.

- 1  
2  
3 387 30. Popkin BM, Corvalan C, Grummer-Strawn LM. Dynamics of the double burden of  
4 388 malnutrition and the changing nutrition reality. *The Lancet*. 2020;395(10217):65-74.
- 5 389 31. Christian AK, Dake FA. Profiling household double and triple burden of malnutrition in  
6 390 sub-Saharan Africa: Prevalence and influencing household factors. *Public Health Nutrition*.  
7 391 2022;25(6):1563-76.
- 8 392 32. Wong C, Zalilah M, Chua E, Norhasmah S, Chin Y, Siti Nur' Asyura A. Double-burden  
9 393 of malnutrition among the indigenous peoples (Orang Asli) of Peninsular Malaysia. *BMC Public*  
10 394 *Health*. 2015;15(1):1-9.
- 11 395 33. Sunuwar DR, Singh DR, Pradhan PMS. Prevalence and factors associated with double  
12 396 and triple burden of malnutrition among mothers and children in Nepal: evidence from 2016  
13 397 Nepal demographic and health survey. *BMC Public Health*. 2020;20(1):1-11.
- 14 398 34. Villena-Esponera MP, Moreno-Rojas R, Molina-Recio G. Food insecurity and the double  
15 399 burden of malnutrition of indigenous refugee Épera Siapidara. *Journal of immigrant and minority*  
16 400 *health*. 2019;21(5):1035-42.
- 17 401 35. Tiwari N. The Influence of Single Parent Environment on Children's Learning and  
18 402 Development.
- 19 403 36. Molitoris J. Breastfeeding during pregnancy and its association with childhood  
20 404 malnutrition and pregnancy loss in low-and middle-income countries. *Lund Papers in Economic*  
21 405 *Demography*. 2018;2018(3):1-81.
- 22 406 37. Raihana S, Alam A, Huda TM, Dibley MJ. Factors associated with delayed initiation of  
23 407 breastfeeding in health facilities: secondary analysis of Bangladesh demographic and health  
24 408 survey 2014. *International Breastfeeding Journal*. 2021;16(1):1-13.
- 25 409 38. Belachew A. Timely initiation of breastfeeding and associated factors among mothers of  
26 410 infants age 0–6 months old in Bahir Dar City, Northwest, Ethiopia, 2017: a community based  
27 411 cross-sectional study. *International breastfeeding journal*. 2019;14(1):1-6.
- 28 412 39. Saaka M, Hammond AY. Caesarean section delivery and risk of poor childhood growth.  
29 413 *Journal of nutrition and metabolism*. 2020;2020.
- 30 414 40. Pekmez CT, Dragsted LO, Brahe LK. Gut microbiota alterations and dietary modulation  
31 415 in childhood malnutrition—the role of short chain fatty acids. *Clinical Nutrition*. 2019;38(2):615-  
32 416 30.
- 33 417 41. Kibria A, Muhammed G, Swasey K, Hasan MZ, Sharmeen A, Day B. Prevalence and  
34 418 factors associated with underweight, overweight and obesity among women of reproductive age  
35 419 in India. *Global health research and policy*. 2019;4(1):1-12.
- 36 420 42. Kumar P, Chauhan S, Patel R, Srivastava S, Bansod DW. Prevalence and factors  
37 421 associated with triple burden of malnutrition among mother-child pairs in India: a study based on  
38 422 National Family Health Survey 2015–16. *BMC Public Health*. 2021;21(1):1-12.
- 39 423 43. Sekiyama M, Jiang HW, Gunawan B, Dewanti L, Honda R, Shimizu-Furusawa H, et al.  
40 424 Double burden of malnutrition in rural West Java: household-level analysis for father-child and  
41 425 mother-child pairs and the association with dietary intake. *Nutrients*. 2015;7(10):8376-91.
- 42 426 44. Liguori J, Trübswasser U, Pradeilles R, Le Port A, Landais E, Talsma EF, et al. How do  
43 427 food safety concerns affect consumer behaviors and diets in low-and middle-income countries?  
44 428 A systematic review. *Global Food Security*. 2022;32:100606.
- 45 429 45. Drammeh W, Hamid NA, Rohana A. Determinants of household food insecurity and its  
46 430 association with child malnutrition in Sub-Saharan Africa: A review of the literature. *Current*  
47 431 *Research in Nutrition and Food Science Journal*. 2019;7(3):610-23.

- 1  
2  
3 432 46. Serbesa ML, Iffa MT, Geleto M. Factors associated with malnutrition among pregnant  
4 433 women and lactating mothers in Miesso Health Center, Ethiopia. *European Journal of*  
5 434 *Midwifery*. 2019;3.
- 6 435 47. Bhavadharini B, Anjana RM, Deepa M, Jayashree G, Nrutya S, Shobana M, et al.  
7 436 Gestational weight gain and pregnancy outcomes in relation to body mass index in Asian Indian  
8 437 women. *Indian Journal of Endocrinology and Metabolism*. 2017;21(4):588.
- 9 438 48. Sinha RK, Dua R, Bijalwan V, Rohatgi S, Kumar P. Determinants of stunting, wasting,  
10 439 and underweight in five high-burden pockets of four Indian states. *Indian journal of community*  
11 440 *medicine: official publication of Indian Association of Preventive & Social Medicine*.  
12 441 2018;43(4):279.
- 13 442 49. Pal A, Manna S, Dalui R, Mukhopadhyay R, Dhara PC. Undernutrition and associated  
14 443 factors among children aged 5–10 years in West Bengal, India: a community-based cross-  
15 444 sectional study. *Egyptian Pediatric Association Gazette*. 2021;69(1):1-12.
- 16 445 50. Anuradha R, Sivanandham R, Salome SD, Francis R, Roopa D, Sampavi S, et al.  
17 446 Nutritional status of children aged 3-6 years in a rural area of Tamilnadu. *Journal of clinical and*  
18 447 *diagnostic research: JCDR*. 2014;8(10):JC01.
- 19 448 51. Hawkes S, Buse K. Gender and global health: evidence, policy, and inconvenient truths.  
20 449 *The Lancet*. 2013;381(9879):1783-7.
- 21 450 52. Thurstans S, Opondo C, Seal A, Wells J, Khara T, Dolan C, et al. Boys are more likely to  
22 451 be undernourished than girls: a systematic review and meta-analysis of sex differences in  
23 452 undernutrition. *BMJ global health*. 2020;5(12):e004030.
- 24 453 53. Asfaw M, Wondaferash M, Taha M, Dube L. Prevalence of undernutrition and associated  
25 454 factors among children aged between six to fifty nine months in Bule Hora district, South  
26 455 Ethiopia. *BMC Public health*. 2015;15(1):1-9.
- 27 456 54. Nagarkar AM, Kulkarni SS. Obesity and its effects on health in middle-aged women  
28 457 from slums of Pune. *Journal of Mid-life Health*. 2018;9(2):79.

458

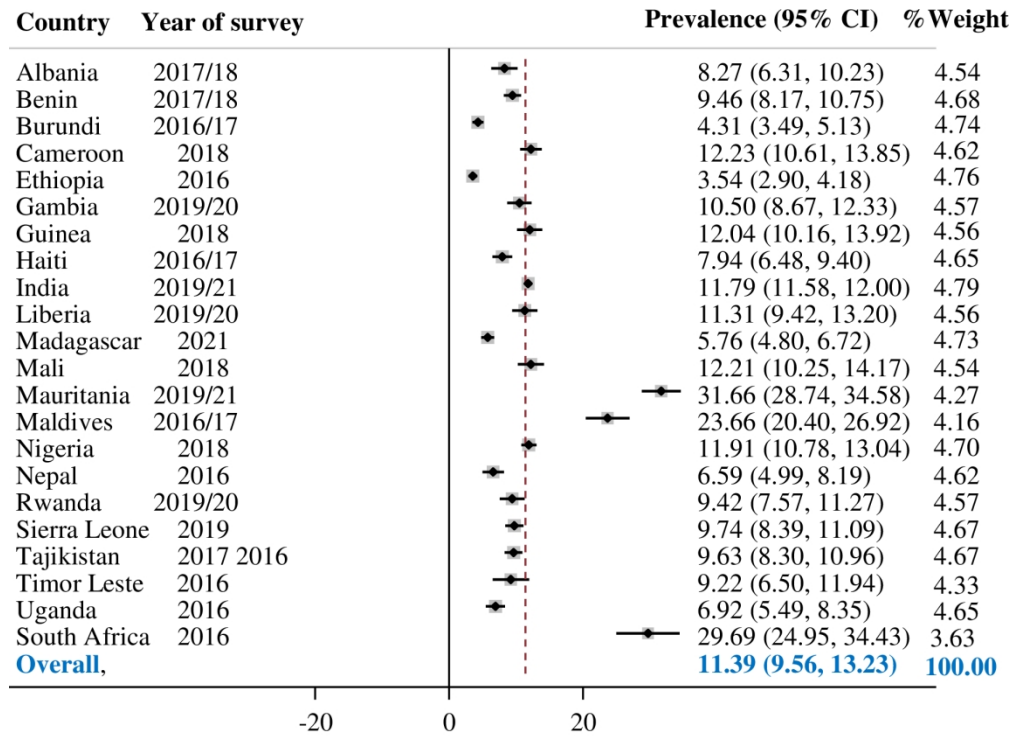

NOTE: Weights are from random-effects model

161x123mm (300 x 300 DPI)



## STROBE Statement—checklist of items that should be included in reports of observational studies

|                              | Item No | Recommendation                                                                                                                                                                                                                                                                                                                                                                                                                                                         | Page No |
|------------------------------|---------|------------------------------------------------------------------------------------------------------------------------------------------------------------------------------------------------------------------------------------------------------------------------------------------------------------------------------------------------------------------------------------------------------------------------------------------------------------------------|---------|
| <b>Title and abstract</b>    | 1       | (a) Indicate the study's design with a commonly used term in the title or the abstract                                                                                                                                                                                                                                                                                                                                                                                 | 1       |
|                              |         | (b) Provide in the abstract an informative and balanced summary of what was done and what was found                                                                                                                                                                                                                                                                                                                                                                    | 2, 3    |
| <b>Introduction</b>          |         |                                                                                                                                                                                                                                                                                                                                                                                                                                                                        |         |
| Background/rationale         | 2       | Explain the scientific background and rationale for the investigation being reported                                                                                                                                                                                                                                                                                                                                                                                   | 4       |
| Objectives                   | 3       | State specific objectives, including any prespecified hypotheses                                                                                                                                                                                                                                                                                                                                                                                                       | 5       |
| <b>Methods</b>               |         |                                                                                                                                                                                                                                                                                                                                                                                                                                                                        |         |
| Study design                 | 4       | Present key elements of study design early in the paper                                                                                                                                                                                                                                                                                                                                                                                                                | 5       |
| Setting                      | 5       | Describe the setting, locations, and relevant dates, including periods of recruitment, exposure, follow-up, and data collection                                                                                                                                                                                                                                                                                                                                        | 5       |
| Participants                 | 6       | (a) <i>Cohort study</i> —Give the eligibility criteria, and the sources and methods of selection of participants. Describe methods of follow-up<br><i>Case-control study</i> —Give the eligibility criteria, and the sources and methods of case ascertainment and control selection. Give the rationale for the choice of cases and controls<br><i>Cross-sectional study</i> —Give the eligibility criteria, and the sources and methods of selection of participants | 7       |
|                              |         | (b) <i>Cohort study</i> —For matched studies, give matching criteria and number of exposed and unexposed<br><i>Case-control study</i> —For matched studies, give matching criteria and the number of controls per case                                                                                                                                                                                                                                                 |         |
| Variables                    | 7       | Clearly define all outcomes, exposures, predictors, potential confounders, and effect modifiers. Give diagnostic criteria, if applicable                                                                                                                                                                                                                                                                                                                               | 7       |
| Data sources/<br>measurement | 8*      | For each variable of interest, give sources of data and details of methods of assessment (measurement). Describe comparability of assessment methods if there is more than one group                                                                                                                                                                                                                                                                                   | 7       |
| Bias                         | 9       | Describe any efforts to address potential sources of bias                                                                                                                                                                                                                                                                                                                                                                                                              |         |
| Study size                   | 10      | Explain how the study size was arrived at                                                                                                                                                                                                                                                                                                                                                                                                                              | 6       |
| Quantitative variables       | 11      | Explain how quantitative variables were handled in the analyses. If applicable, describe which groupings were chosen and why                                                                                                                                                                                                                                                                                                                                           | 7       |
| Statistical methods          | 12      | (a) Describe all statistical methods, including those used to control for confounding                                                                                                                                                                                                                                                                                                                                                                                  | 7,8     |
|                              |         | (b) Describe any methods used to examine subgroups and interactions                                                                                                                                                                                                                                                                                                                                                                                                    |         |
|                              |         | (c) Explain how missing data were addressed                                                                                                                                                                                                                                                                                                                                                                                                                            |         |
|                              |         | (d) <i>Cohort study</i> —If applicable, explain how loss to follow-up was addressed<br><i>Case-control study</i> —If applicable, explain how matching of cases and controls was addressed<br><i>Cross-sectional study</i> —If applicable, describe analytical methods taking account of sampling strategy                                                                                                                                                              |         |
|                              |         | (e) Describe any sensitivity analyses                                                                                                                                                                                                                                                                                                                                                                                                                                  |         |

Continued on next page

| <b>Results</b>           |     |                                                                                                                                                                                                                                                                                                                                                                                                               |       |
|--------------------------|-----|---------------------------------------------------------------------------------------------------------------------------------------------------------------------------------------------------------------------------------------------------------------------------------------------------------------------------------------------------------------------------------------------------------------|-------|
| Participants             | 13* | (a) Report numbers of individuals at each stage of study—eg numbers potentially eligible, examined for eligibility, confirmed eligible, included in the study, completing follow-up, and analysed<br>(b) Give reasons for non-participation at each stage<br>(c) Consider use of a flow diagram                                                                                                               | 8     |
| Descriptive data         | 14* | (a) Give characteristics of study participants (eg demographic, clinical, social) and information on exposures and potential confounders<br>(b) Indicate number of participants with missing data for each variable of interest<br>(c) <i>Cohort study</i> —Summarise follow-up time (eg, average and total amount)                                                                                           | 8,9   |
| Outcome data             | 15* | <i>Cohort study</i> —Report numbers of outcome events or summary measures over time<br><i>Case-control study</i> —Report numbers in each exposure category, or summary measures of exposure<br><i>Cross-sectional study</i> —Report numbers of outcome events or summary measures                                                                                                                             | 9     |
| Main results             | 16  | (a) Give unadjusted estimates and, if applicable, confounder-adjusted estimates and their precision (eg, 95% confidence interval). Make clear which confounders were adjusted for and why they were included<br>(b) Report category boundaries when continuous variables were categorized<br>(c) If relevant, consider translating estimates of relative risk into absolute risk for a meaningful time period | 10/12 |
| Other analyses           | 17  | Report other analyses done—eg analyses of subgroups and interactions, and sensitivity analyses                                                                                                                                                                                                                                                                                                                |       |
| <b>Discussion</b>        |     |                                                                                                                                                                                                                                                                                                                                                                                                               |       |
| Key results              | 18  | Summarise key results with reference to study objectives                                                                                                                                                                                                                                                                                                                                                      | 12/15 |
| Limitations              | 19  | Discuss limitations of the study, taking into account sources of potential bias or imprecision. Discuss both direction and magnitude of any potential bias                                                                                                                                                                                                                                                    | 15    |
| Interpretation           | 20  | Give a cautious overall interpretation of results considering objectives, limitations, multiplicity of analyses, results from similar studies, and other relevant evidence                                                                                                                                                                                                                                    | 15    |
| Generalisability         | 21  | Discuss the generalisability (external validity) of the study results                                                                                                                                                                                                                                                                                                                                         | 15    |
| <b>Other information</b> |     |                                                                                                                                                                                                                                                                                                                                                                                                               |       |
| Funding                  | 22  | Give the source of funding and the role of the funders for the present study and, if applicable, for the original study on which the present article is based                                                                                                                                                                                                                                                 |       |

\*Give information separately for cases and controls in case-control studies and, if applicable, for exposed and unexposed groups in cohort and cross-sectional studies.

**Note:** An Explanation and Elaboration article discusses each checklist item and gives methodological background and published examples of transparent reporting. The STROBE checklist is best used in conjunction with this article (freely available on the Web sites of PLoS Medicine at <http://www.plosmedicine.org/>, Annals of Internal Medicine at <http://www.annals.org/>, and Epidemiology at <http://www.epidem.com/>). Information on the STROBE Initiative is available at [www.strobe-statement.org](http://www.strobe-statement.org).

# BMJ Open

## Triple burden of malnutrition among mother-child pairs in low and middle-income countries: A cross-sectional study

|                                 |                                                                                                                                                                                                                                                                                                                                                                                                                                                                                                                                                                                                                                                                                                                                                                                                                                                                                                                                                                            |
|---------------------------------|----------------------------------------------------------------------------------------------------------------------------------------------------------------------------------------------------------------------------------------------------------------------------------------------------------------------------------------------------------------------------------------------------------------------------------------------------------------------------------------------------------------------------------------------------------------------------------------------------------------------------------------------------------------------------------------------------------------------------------------------------------------------------------------------------------------------------------------------------------------------------------------------------------------------------------------------------------------------------|
| Journal:                        | <i>BMJ Open</i>                                                                                                                                                                                                                                                                                                                                                                                                                                                                                                                                                                                                                                                                                                                                                                                                                                                                                                                                                            |
| Manuscript ID                   | bmjopen-2022-070978.R1                                                                                                                                                                                                                                                                                                                                                                                                                                                                                                                                                                                                                                                                                                                                                                                                                                                                                                                                                     |
| Article Type:                   | Original research                                                                                                                                                                                                                                                                                                                                                                                                                                                                                                                                                                                                                                                                                                                                                                                                                                                                                                                                                          |
| Date Submitted by the Author:   | 17-Mar-2023                                                                                                                                                                                                                                                                                                                                                                                                                                                                                                                                                                                                                                                                                                                                                                                                                                                                                                                                                                |
| Complete List of Authors:       | Chilot, Dagmawi; University of Gondar College of Medicine and Health Sciences, Department of Human Physiology<br>Belay, Daniel; University of Gondar College of Medicine and Health Sciences, Department of Human Anatomy<br>Merid, Mehari ; University of Gondar College of Medicine and Health Sciences, Department of Epidemiology and Biostatistics<br>Kibret, Anteneh; University of Gondar College of Medicine and Health Sciences, Department of Human anatomy<br>Alem, Adugnaw ; University of Gondar College of Medicine and Health Sciences, Department of Epidemiology and Bio statistics<br>Asratie, Melaku; University of Gondar College of Medicine and Health Sciences, Department of women and family health<br>Teshager, Nahom ; University of Gondar College of Medicine and Health Sciences, Department of pediatrics<br>Aragaw, Fantu Mamo; University of Gondar College of Medicine and Health Sciences, Department of Epidemiology and Biostatistics |
| <b>Primary Subject Heading</b>: | Epidemiology                                                                                                                                                                                                                                                                                                                                                                                                                                                                                                                                                                                                                                                                                                                                                                                                                                                                                                                                                               |
| Secondary Subject Heading:      | Nutrition and metabolism, Public health                                                                                                                                                                                                                                                                                                                                                                                                                                                                                                                                                                                                                                                                                                                                                                                                                                                                                                                                    |
| Keywords:                       | NUTRITION & DIETETICS, EPIDEMIOLOGY, PUBLIC HEALTH, Health policy < HEALTH SERVICES ADMINISTRATION & MANAGEMENT, Community child health < PAEDIATRICS                                                                                                                                                                                                                                                                                                                                                                                                                                                                                                                                                                                                                                                                                                                                                                                                                      |
|                                 |                                                                                                                                                                                                                                                                                                                                                                                                                                                                                                                                                                                                                                                                                                                                                                                                                                                                                                                                                                            |

SCHOLARONE™  
Manuscripts



I, the Submitting Author has the right to grant and does grant on behalf of all authors of the Work (as defined in the below author licence), an exclusive licence and/or a non-exclusive licence for contributions from authors who are: i) UK Crown employees; ii) where BMJ has agreed a CC-BY licence shall apply, and/or iii) in accordance with the terms applicable for US Federal Government officers or employees acting as part of their official duties; on a worldwide, perpetual, irrevocable, royalty-free basis to BMJ Publishing Group Ltd ("BMJ") its licensees and where the relevant Journal is co-owned by BMJ to the co-owners of the Journal, to publish the Work in this journal and any other BMJ products and to exploit all rights, as set out in our [licence](#).

The Submitting Author accepts and understands that any supply made under these terms is made by BMJ to the Submitting Author unless you are acting as an employee on behalf of your employer or a postgraduate student of an affiliated institution which is paying any applicable article publishing charge ("APC") for Open Access articles. Where the Submitting Author wishes to make the Work available on an Open Access basis (and intends to pay the relevant APC), the terms of reuse of such Open Access shall be governed by a Creative Commons licence – details of these licences and which [Creative Commons](#) licence will apply to this Work are set out in our licence referred to above.

Other than as permitted in any relevant BMJ Author's Self Archiving Policies, I confirm this Work has not been accepted for publication elsewhere, is not being considered for publication elsewhere and does not duplicate material already published. I confirm all authors consent to publication of this Work and authorise the granting of this licence.

# 1 Triple burden of malnutrition among mother-child pairs in low and 2 middle-income countries: A cross-sectional study

3  
4  
5  
6  
7  
8  
9 4 Dagmawi Chilot\*<sup>1</sup>, Daniel Gashaneh Belay<sup>3,4</sup>, Mehari Woldemariam Merid<sup>4</sup>, Anteneh Ayelign  
10 5 Kibret<sup>3</sup>, Adugnaw Zeleke Alem<sup>4</sup>, Melaku Hunie Asratie<sup>5</sup>, Nahom Worku Teshager<sup>6</sup> and Fantu  
11 6 Mamo Aragaw<sup>4</sup>

12  
13  
14  
15 8 <sup>1</sup>Department of Human Physiology, University of Gondar, College of Medicine and Health  
16 9 Science, School of Medicine, Gondar, Ethiopia;

17  
18  
19 10 <sup>3</sup>Department of Human Anatomy, University of Gondar, College of Medicine and Health Science,  
20 11 School of Medicine, Gondar, Ethiopia;

21  
22 12 <sup>4</sup>Department of Epidemiology & Biostatistics, University of Gondar, College of Medicine and  
23 13 Health Science, Institute of Public Health, Gondar, Ethiopia;

24  
25  
26 14 <sup>5</sup>Department of women and family health, University of Gondar, College of Medicine and Health  
27 15 Science, School of Midwifery, Gondar, Ethiopia;

28  
29 16 <sup>6</sup>Department of Pediatrics and Child Health, University of Gondar, College of Medicine and Health  
30 17 Science, School of Medicine, Gondar, Ethiopia;

31  
32  
33  
34  
35 19 Correspondence: Dagmawi Chilot: dagimchilot21@gmail.com. <sup>1</sup>Department of Human  
36 20 Physiology, University of Gondar, College of Medicine and Health Sciences, University of  
37 21 Gondar, P.O. Box 196, Gondar, Ethiopia,

30

**Abstract**

**Objective:** This study aimed to assess the prevalence and determinants of the triple burden of malnutrition among mother-child pairs in low-and middle-income countries.

**Design:** Cross-Sectional Study

**Setting:** Low-and middle-income countries

**Participants:** Women and children

**Primary outcome:** Triple burden of malnutrition (overweight/obese mother with undernourished and anemic under 5 years child)

**Methods:** Data for this study were drawn from recent 22 low and middle-income countries Demographic and Health Surveys (DHSs). A total weighted sample of 116,795 mother-child pairs was included in the study. STATA version 14.2 was used to clean, code and analyze the data. Multilevel logistic regression was employed to identify factors associated with the problem. Adjusted odds ratio with 95% CI and a P value <0.05 was reported to indicate statistical association. Model fitness and comparison were done using ICC, MOR, PCV, and deviance.

**Result:** The pooled prevalence of the triple burden of malnutrition among mother-child pairs was 11.39%. It showed statistically significant positive associations with mothers aged  $\geq 35$  years (AOR=2.25,95%CI 2.08-2.44), family size >10 (AOR=1.17,95%CI 1.08-1.26), delivery by CS (AOR=1.93,95%CI 1.83-2.03), the richest household (AOR=1.72,95%CI 1.56-1.88), grand multiparous (AOR=1.62, 95% CI 1.46-1.81), age of child 36-47 months (AOR=1.77, 95% CI 1.64-1.90), at a p-value of <0.05. Whereas breastfeeding (AOR=0.94,95%CI 0.89-0.99), married mothers (AOR=0.87,95%CI 0.78-0.96), female children (AOR=0.88,95%CI 0.84-0.92), improved toilet (AOR=0.23,95%CI 0.17-0.29), improved source of drinking water (AOR=0.28,95%CI 0.21-

53 0.35), rural residents (AOR=0.66,95%CI 0.62-0.69) had a contrasting relationship with the triple  
54 burden of malnutrition

55 **Conclusion:** About 1 out of 10 households suffer from the triple burden of malnutrition in low  
56 and middle-income countries. This study revealed that several maternal, child, household, and  
57 community-level factors have a significant impact on the triple burden of malnutrition among  
58 mother-child pairs.

59 **Keywords:** Triple burden, mother-child pairs, malnutrition, low and middle-income countries.

### 60 **Strengths and limitations of this study**

- 61 ➤ The findings were supported by large datasets covering 22 LMICs.
- 62 ➤ We employed multilevel analysis which is an appropriate methodology for such data
- 63 ➤ The data were collected using a common internationally acceptable methodological procedure.
- 64 ➤ DHS used a cross-sectional survey design, and the causal relationship between the triple  
65 burden of malnutrition and the independent variables cannot be established.
- 66 ➤ We didn't include important covariates such as dietary intake, physical activity level, or  
67 comorbidities as the DHS did not collect information on these variables

## 74 **Background**

75 The triple burden of malnutrition, defined as the coexistence of overnutrition, undernutrition, and  
76 micronutrient deficiencies is increasing in low and middle-income countries (LMICs) (1). The  
77 World Health Organization (WHO) characterized overnutrition (Obesity and overweight) as a  
78 pandemic of a major public health concern due to the increased frequency of the problem in many  
79 countries (2). It is ranked as the sixth leading cause of disability-adjusted life years (DALYs) and  
80 accounts for approximately 4 million people dying each year worldwide (3-5). Several previous  
81 studies have shown, following marked dietary change that obesity/overweight is increasing more  
82 rapidly in low and middle-income countries compared to higher-income countries (6, 7).

83 Similarly, undernutrition continues to be a major public health concern throughout the developing  
84 world (8, 9). Nearly half of all deaths in children under 5 are attributable to undernutrition and it  
85 encompasses wasting, stunting, underweight, and micronutrient deficiencies (anemia) (10, 11).  
86 Despite stunting having declined steadily, faster progress is needed to reach the 2030 target (12,  
87 13). Wasting and underweight persisting at alarming rates require a reversal in trajectory if the  
88 2030 target is to be achieved (14). Since 2000, a significant reduction in the prevalence of anemia  
89 in children under five has been observed in many low- and lower-middle-income countries (15).  
90 Children are more vulnerable to inadequate pre-natal, infant, and young child nutrition, particularly  
91 in resource-constrained settings (16, 17). Endorsing early childhood feeding best practices is  
92 crucial to improve the health of children (18).

93 Malnutrition has a tremendous negative impact on the normal functioning of every organ system  
94 (19). It can cause permanent, widespread damage to a child's growth, development, and well-being  
95 (20). Scientific evidence has shown that malnutrition in children is associated with poorer school  
96 performance, increased susceptibility to infections, and slow recovery from illness (21, 22).



1  
2  
3 97 Maternal malnutrition increases the risk of poor pregnancy outcomes including obstructed labor,  
4  
5 98 premature or low-birth-weight babies, and postpartum hemorrhage (23, 24). To reduce the problem  
6  
7  
8 99 the United Nations (UN) adopted the Sustainable Development Goals (SDGs), especially those  
9  
10 100 targeted to end poverty in all its forms everywhere (SDG 1), end hunger, achieve food security,  
11  
12 101 improve nutrition, promote sustainable agriculture (SDG 2), ensure healthy lives, and promote  
13  
14 102 well-being for all at all ages (SDG 3) (25, 26).

15  
16  
17 103 Previous literature recognizes the basic and underlying causes of malnutrition including the  
18  
19 104 environmental, economic, and sociopolitical contextual factors, with poverty having a central role  
20  
21  
22 105 (11, 27-29). The triple burden of malnutrition among mother-child pairs is a relatively new issue  
23  
24 106 and only a few country-based studies explore the problem which couldn't give a panoramic view  
25  
26 107 of the problem in LMICs (30-32). Given the persistent and high levels of the problem in these  
27  
28 108 countries, there is a strong need for action. To design and deliver effective interventions adequate  
29  
30 109 understanding of the socioeconomic, environmental, and cultural factors is highly important.  
31  
32  
33 110 Besides if the SDG targets are to be met, coordinated action is required toward not only sustaining  
34  
35 111 current rates of decline but also accelerating progress. Therefore, the objective of this study was  
36  
37 112 to assess the prevalence of the triple burden of malnutrition among mothers and children and the  
38  
39 113 potential factors associated with it in low and middle-income countries.

## 40 41 42 43 114 **Materials and methods**

### 44 45 46 115 **Study design, setting, and period**

47  
48 116 The present study is based on 22 low and middle-income countries that have had Demographic  
49  
50 117 and Health Surveys (DHS) from 2016-2020. The DHS used a cross-sectional survey study design  
51  
52 118 to collect data and provide population and health indicators at the national level. The list of those  
53  
54 119 countries and the respective year of surveys is provided in Table 1.

120 Table 1. Study setting and year of surveys

| Country      | Year of survey | Region              |
|--------------|----------------|---------------------|
| Albania      | 2017/18        | Southeastern Europe |
| Benin        | 2017/18        | West Africa         |
| Burundi      | 2016/17        | East-central Africa |
| Cameroon     | 2018           | West-central Africa |
| Ethiopia     | 2016           | East Africa         |
| Gambia       | 2019/20        | West Africa         |
| Guinea       | 2018           | West Africa         |
| Haiti        | 2016/17        | Caribbean           |
| India        | 2019/21        | South Asia          |
| Liberia      | 2019/20        | West Africa         |
| Madagascar   | 2021           | East Africa         |
| Mali         | 2018           | West Africa         |
| Mauritania   | 2019/21        | Northwest Africa    |
| Maldives     | 2016/17        | South Asia          |
| Nigeria      | 2018           | West Africa         |
| Nepal        | 2016           | South Asia          |
| Rwanda       | 2019/20        | East Africa         |
| Sierra Leone | 2019           | West Africa         |
| Tajikistan   | 2017           | Central Asia        |
| Timor Leste  | 2016           | South Asia          |
| Uganda       | 2016           | East Africa         |
| South Africa | 2016           | South Africa        |

121

122 **Data source and sampling procedure**

123 The current analyses was based on pooled data from DHSs in 22 LMICs. These are nationally

124 representative surveys that collect data on reproductive, maternal, neonatal, child health, and

125 nutrition in LMIC. The surveys are similarly designed that used standardized questionnaires and

126 data collection procedures, allowing therefore comparability of results. The survey employed a

127 two-stage cluster sampling technique. In the first stage, the selection of proportional

128 clusters/enumeration areas was performed using each country's most recent population and

129 housing census as a sampling frame. In the second stage, a systematic selection of households from

130 the newly created cluster was performed. A detailed description of the DHS sampling design and

131 data collection procedures has been found in each country's DHS report. The study population for

1  
2  
3 132 this study was mother-child pairs. Weighting was done using the complex sample design weighting  
4  
5 133 and the “svyset” Stata command was applied. Variables v005 (sampling weight), v021 (primary  
6  
7 134 sampling unit), and v023 (stratification used in sample design) were used, and as the result, a total  
8  
9 135 weighted sample of 116,795 mother-child pairs was included in the analysis.  
10  
11

## 12 136 **Definition of variables**

### 137 **Outcome variable:**

138 The triple burden of malnutrition was the outcome variable of this study where the mother was  
139 overweight/obese and children under 5 years of age were undernourished and anemic (31, 33). At  
140 the same household level, first, we created four different categories of malnutrition such as  
141 overweight/obese mother and stunted child, overweight/obese mother and wasted child,  
142 overweight/obese mother and underweight child, and overweight/obese mother and anemic child.  
143 Then we further combined overweight/obese mothers, undernourished children, and anemic  
144 children to generate the triple burden of malnutrition. Categorization was made based on height-  
145 for-age z-score (HAZ), standard deviations (SD), weight-for-height z-score (WHZ), weight-for-  
146 age z-score (WAZ), hemoglobin level, and body mass index (BMI).

147 Stunting dichotomized and coded into 0=Not stunted (HAZ  $\geq$  -2SD and above) & 1= Stunted  
148 (HAZ  $<$  -2SD);

149 Wasting dichotomized and coded into 0=Not wasted (WHZ  $\geq$  -2SD to  $\leq$  +2SD) and 1=Wasted  
150 (WHZ  $<$  -2SD);

151 Underweight dichotomized and coded into 0= Not underweight (WHZ  $\geq$  -2SD and above) & 1=  
152 Underweight (WAZ  $<$  -2SD);

153 Child anemia dichotomized and coded into 0= Not anemic (hemoglobin level  $>$  11 g/dl), & 1=  
154 Anemic (hemoglobin level  $<$  11 g/dl);

1  
2  
3 155 Mother's BMI dichotomized and coded into 0= Normal (18.5–24.9 kg/m<sup>2</sup>) &  
4  
5 156 1= Overweight/Obese ( $\geq 25$  kg/m<sup>2</sup>)  
6

7  
8 157 The triple burden of malnutrition was dichotomized and coded into 0= NO (not overweight/obese  
9  
10 158 mother and not undernourished child plus not anemic child, and 1= YES (overweight/obese mother  
11  
12 159 and undernourished child plus anemic child)  
13

14  
15 160 An undernourished child is a child who is stunted or wasted or underweight.  
16

### 17 161 **Independent variables:**

18  
19 162 Based on previous works of literature and the likelihood of influencing the outcome of interest,  
20  
21 163 several explanatory variables including the age of mothers, mother's education, marital status,  
22  
23 164 current breastfeeding, delivery by cesarean section, family size, wealth index, media access, parity,  
24  
25 165 age of the child, sex of the child, type of toilet facility, source of drinking water, residence and  
26  
27 166 distance to health facility were considered.  
28  
29

### 30 31 167 **Statistical analyses**

32  
33 168 We append the dataset of each country to generate pooled data. The data extraction, coding, and  
34  
35 169 analysis were carried out using STATA software version 14.2. We weighted the sample to restore  
36  
37 170 the representativeness of the sample so that the total sample looks like the country's actual  
38  
39 171 population. Due to the hierarchical nature of the DHS, the multilevel analysis was fitted to identify  
40  
41 172 significantly associated factors. Four models were fitted; the null model (with no predictors), the  
42  
43 173 model I (adjusted for individual-level variables only), model II (adjusted for community-level  
44  
45 174 variables only), and model III (model adjustment for both individual and community-level  
46  
47 175 variables simultaneously). Adjusted OR (AOR) with 95% CI and  $p < 0.05$  were used to determine  
48  
49 176 significant predictors. Model fitness and comparison were done using Intraclass Correlation  
50  
51  
52  
53  
54  
55  
56  
57  
58  
59  
60

177 Coefficient (ICC), Proportional Change in Variance (PCV), Median Odds Ratio (MOR), the  
 178 Likelihood Ratio test (LR), and deviance computed.

179

## 180 **Patient and public involvement statement**

181 As our study used secondary analysis of DHS data, participants and the public were not involved  
 182 in the study design or planning of the study. The study participants were not consulted to interpret  
 183 the results and write or editing of this document for readability or accuracy.

## 184 **Results**

### 185 **Demographics and socioeconomic characteristics**

186 A total of 116,795 mother-child pairs were included in the study. Over half (56.48%) of mothers  
 187 were in the age category of 25-34 years. About 22.98% of mothers were illiterate and the majority  
 188 (46.39%) had attended secondary education. Approximately 95.73% of mothers were married and  
 189 62.89% were currently breastfeeding. About 20.33% and 21.21% of the households were in the  
 190 low wealth quintile of poorest and poorer respectively. Over a quarter (27.62%) of the families  
 191 had never been exposed to any type of media. The majority of the children (32.59%) were aged  
 192  $\leq 12$  months. A large proportion (83.60%) of the households had improved sources of drinking  
 193 water and almost two-thirds (67.02%) of the households had improved toilet facilities. Almost  
 194 three fourth (71.03%) of participants lived in rural areas and for over a quarter (27.42%) of those  
 195 participants, the distance to access health facilities was a big problem (**Table 2**).

196 Table 2. Socio-demographic characteristics of the study participants

| Variables      | Categories | Unweighted frequency (%) | Weighted frequency (%) |
|----------------|------------|--------------------------|------------------------|
| Age of mothers | 15-24      | 34,983 (29.05)           | 35,918 (30.75)         |
|                | 25-34      | 68,386 (56.78)           | 65,971 (56.48)         |

|                              |                   |                 |                 |
|------------------------------|-------------------|-----------------|-----------------|
|                              | ≥35               | 17,073 (14.18)  | 14,906 (12.76)  |
| Mothers education            | No education      | 27,995 (23.24)  | 26,845 (22.98)  |
|                              | Primary education | 19,684 (16.34)  | 18,633 (15.95)  |
|                              | Secondary         | 57,008 (47.33)  | 54,185 (46.39)  |
|                              | Higher            | 15,755 (13.08)  | 17,131 (14.67)  |
| Mothers marital status       | Not in union      | 5,583 (4.64)    | 4,987 (4.27)    |
|                              | Married           | 114,859 (95.36) | 111,807 (95.73) |
| Currently breastfeeding      | No                | 44,160 (36.66)  | 43,338 (37.11)  |
|                              | Yes               | 76,282 (63.34)  | 73,457 (62.89)  |
| Delivery by cesarean section | No                | 99,291 (82.49)  | 93,974 (80.51)  |
|                              | Yes               | 21,077 (17.51)  | 22,748 (19.49)  |
| Family size                  | ≤5                | 56,365 (46.80)  | 53,677 (45.96)  |
|                              | 6-10              | 54,605 (45.34)  | 53,258 (45.60)  |
|                              | >10               | 9,472 (7.86)    | 9,859 (8.44)    |
| Wealth index                 | Poorest           | 28,097 (23.33)  | 23,749 (20.33)  |
|                              | Poorer            | 27,352 (22.71)  | 24,774 (21.21)  |
|                              | Middle            | 24,741 (20.54)  | 24,330 (20.83)  |
|                              | Richer            | 22,180 (18.42)  | 23,880 (20.45)  |
|                              | Richest           | 18,072 (15.00)  | 20,061 (17.18)  |
| Media access                 | No                | 33,942 (28.18)  | 32,256 (27.62)  |
|                              | Yes               | 86,500 (71.82)  | 84,539 (72.38)  |
| Parity                       | Primiparous       | 36,241 (30.09)  | 35,333 (30.25)  |
|                              | Multiparous       | 76,092 (63.18)  | 73,823 (63.21)  |
|                              | Grand Multiparous | 8,109 (6.73)    | 7,639 (6.54)    |
| Age of child                 | ≤12               | 38,959 (32.35)  | 38,059 (32.59)  |
|                              | 13-23             | 25,382 (21.07)  | 24,819 (21.25)  |
|                              | 24-35             | 22,208 (18.44)  | 21,478 (18.39)  |
|                              | 36-47             | 17,948 (14.90)  | 17,204 (14.73)  |
|                              | 48-59             | 15,945 (13.24)  | 15,234 (13.04)  |
| Sex of child                 | Male              | 63,660 (52.86)  | 62,008 (53.09)  |
|                              | Female            | 56,782 (47.14)  | 54,787 (46.91)  |
| Type of toilet facility      | Unimproved        | 37,519 (31.15)  | 38,518 (32.98)  |
|                              | Improved          | 82,923 (68.85)  | 78,277 (67.02)  |
| Source of drinking water     | Unimproved        | 20,959 (17.40)  | 19,159 (16.40)  |
|                              | Improved          | 99,483 (82.60)  | 97,636 (83.60)  |
| Residence                    | Urban             | 28,722 (23.85)  | 33,838 (28.97)  |
|                              | Rural             | 91,720 (76.15)  | 82,957 (71.03)  |
| Distance to health facility  | No problem        | 84,605 (70.25)  | 84,776 (72.58)  |
|                              | Big problem       | 35,837 (29.75)  | 32,019 (27.42)  |

197

198 **Prevalence of triple burden of malnutrition**

199 In 22 low and middle-income countries, the pooled prevalence of the triple burden of malnutrition  
200 among mother-child pairs was found at 11.39 % (95% CI 9.56%, 13.23%). Ethiopia has the lowest  
201 (3.54 %) prevalence of triple burden while Mauritania (31.66%) bears the highest (**Figure 1**).

202 Fig 1. The pooled prevalence of the triple burden of malnutrition

## 203 **Multilevel analyses**

### 204 **Random parameter estimation and model selection**

205 Based on the result of random effect analysis, the ICC of the null model was 0.30, indicating that  
206 30% of the total variability in triple burden prevalence was attributable to between-cluster  
207 variability, while about 70% was due to individual differences. The null model MOR was 3.04,  
208 which indicates that a mother/child from a cluster with a high triple burden prevalence has a 3.04  
209 times higher probability of being malnourished than a mother/child from a cluster with a lower  
210 prevalence. Model III was the best-fitted model since it has the highest log likelihood (-91665)  
211 and the lowest deviance (183,330) value (**Table 3**).

### 212 **Factors associated with the triple burden of malnutrition (Fixed effects)**

213 The triple burden of malnutrition was statistically significant with mothers aged 25-34 years  
214 (AOR=1.54, 95% CI 1.45 - 1.63),  $\geq 35$  years (AOR=2.25, 95% CI 2.08 - 2.44), mothers attended  
215 secondary education (AOR=1.08, 95% CI 1.02-1.15), family size >10 (AOR=1.17, 95% CI 1.08 -  
216 1.26), delivery by CS (AOR=1.93, 95% CI 1.83 - 2.03), the richer household (AOR=1.63, 95% CI  
217 1.49 - 1.76), the richest household (AOR=1.72, 95% CI 1.56 - 1.88), multiparous (AOR=1.42,  
218 95% CI 1.34 - 1.49), grand multiparous (AOR=1.62, 95% CI 1.46 - 1.81), age of child 36-47  
219 months (AOR=1.77, 95% CI 1.64 - 1.90), age of child 48-59 (AOR=1.51, 95% CI 1.39 - 1.64),  
220 breastfeeding (AOR=0.94, 95% CI 0.89 - 0.99), married mothers (AOR=0.87, 95% CI 0.78 - 0.96),

221 female children (AOR=0.88, 95% CI 0.84 - 0.92), improved toilet facility (AOR=0.23, 95% CI  
 222 0.17 - 0.29), improved source of drinking water (AOR=0.28, 95% CI 0.21 - 0.35), rural residents  
 223 (AOR=0.66, 95% CI 0.62 - 0.69) at a p-value of <0.05 (**Table 3**).

224  
 225 Table 3. Multivariable multilevel logistic regression analysis of the triple burden of malnutrition.

| Variables                | Categories        | Null model           | Model I |        | Model II |                      | Model III |        |
|--------------------------|-------------------|----------------------|---------|--------|----------|----------------------|-----------|--------|
|                          |                   |                      | AOR     | 95% CI | AOR      | 95% CI               | AOR       | 95% CI |
| Age of mothers           | 15-24             | 1.00                 |         |        |          |                      | 1.00      |        |
|                          | 25-34             | 1.54 (1.46 - 1.63)** |         | —      |          | 1.54 (1.45 - 1.63)** |           |        |
|                          | ≥35               | 2.28 (2.11 - 2.47)** |         | —      |          | 2.25 (2.08 - 2.44)** |           |        |
| Mothers education        | No education      | 1.00                 |         |        |          | 1.00                 |           |        |
|                          | Primary education | 1.04 (0.97 - 1.12)   |         | —      |          | 1.04 (0.97 - 1.12)   |           |        |
|                          | Secondary         | 1.08 (1.01 - 1.15)*  |         | —      |          | 1.08 (1.02 - 1.15)*  |           |        |
|                          | Higher            | 0.94 (0.86 - 1.02)   |         | —      |          | 0.94 (0.86 - 1.02)   |           |        |
| Mothers marital status   | Not in union      | 1.00                 |         |        |          | 1.00                 |           |        |
|                          | Married           | 0.83 (0.75 - 0.93)*  |         | —      |          | 0.87 (0.78 - 0.96)** |           |        |
| Currently breast feeding | No                | 1.00                 |         |        |          | 1.00                 |           |        |
|                          | Yes               | 0.92 (0.87 - 0.97)*  |         | —      |          | 0.94 (0.89 - 0.99)*  |           |        |
| Delivery by CS           | No                | 1.00                 |         |        |          | 1.00                 |           |        |
|                          | Yes               | 1.94 (1.84 - 2.04)** |         | —      |          | 1.93 (1.83 - 2.03)** |           |        |
| Family size              | ≤5                | 1.00                 |         |        |          | 1.00                 |           |        |
|                          | 6-10              | 1.00 (0.97 - 1.08)   |         | —      |          | 1.01 (0.98 - 1.08)   |           |        |
|                          | >10               | 1.14 (1.06 - 1.24)** |         | —      |          | 1.17 (1.08 - 1.26)** |           |        |
| Wealth index             | Poorest           | 1.00                 |         |        |          | 1.00                 |           |        |
|                          | Poorer            | 1.41 (1.31 - 1.52)** |         | —      |          | 1.38 (1.28 - 1.49)** |           |        |
|                          | Middle            | 1.60 (1.48 - 1.73)** |         | —      |          | 1.49 (1.38 - 1.62)** |           |        |
|                          | Richer            | 1.86 (1.72 - 2.02)** |         | —      |          | 1.63 (1.49 - 1.76)** |           |        |
|                          | Richest           | 2.15 (1.97 - 2.35)** |         | —      |          | 1.72 (1.56 - 1.88)** |           |        |
| Media access             | No                | 1.00                 |         |        |          | 1.00                 |           |        |
|                          | Yes               | 1.01 (0.98 - 1.08)   |         | —      |          | 1.02 (0.99 - 1.11)   |           |        |
| Parity                   | Primiparous       | 1.00                 |         |        |          | 1.00                 |           |        |
|                          | Multiparous       | 1.42 (1.34 - 1.50)** |         | —      |          | 1.42 (1.34 - 1.49)** |           |        |
|                          | Grand Multiparous | 1.61 (1.44 - 1.79)** |         | —      |          | 1.62 (1.46 - 1.81)** |           |        |
| Age of child             | ≤12               | 1.00                 |         |        |          | 1.00                 |           |        |
|                          | 13-23             | 1.41 (1.32 - 1.50)** |         | —      |          | 1.41 (1.32 - 1.50)** |           |        |
|                          | 24-35             | 1.62 (1.52 - 1.73)** |         | —      |          | 1.63 (1.53 - 1.74)** |           |        |
|                          | 36-47             | 1.75 (1.62 - 1.89)** |         | —      |          | 1.77 (1.64 - 1.90)** |           |        |
|                          | 48-59             | 1.50 (1.38 - 1.62)** |         | —      |          | 1.51 (1.39 - 1.64)** |           |        |
| Sex of child             | Male              | 1.00                 |         |        |          | 1.00                 |           |        |
|                          | Female            | 0.88 (0.84 - 0.92)** |         | —      |          | 0.88 (0.84 - 0.92)** |           |        |



|                                  |                      |                    |                      |                      |
|----------------------------------|----------------------|--------------------|----------------------|----------------------|
| Type of toilet facility          | Unimproved           | 1.00               |                      | 1.00                 |
|                                  | Improved             | 0.24 (0.18 - 1.31) | —                    | 0.23 (0.17 - 0.29)** |
| Source of drinking water         | Unimproved           | 1.00               |                      | 1.00                 |
|                                  | Improved             | 0.21 (0.16 - 0.28) | —                    | 0.28 (0.21 - 0.35)** |
| <b>Community-level variables</b> |                      |                    |                      |                      |
| Residence                        | Urban                |                    | 1.00                 | 1.00                 |
|                                  | Rural                | —                  | 0.49 (0.46 - 0.52)** | 0.66 (0.62 - 0.69)** |
| Distance to health facility      | No problem           |                    | 1.00                 | 1.00                 |
|                                  | Big problem          | —                  | 0.87 (0.82 - 0.91)** | 0.94 (0.89 - 0.98)** |
| <b>Random effect</b>             |                      |                    |                      |                      |
|                                  | Variance             | 1.40               | 1.24                 | 1.31                 |
|                                  | ICC                  | 0.30               | 0.27                 | 0.28                 |
|                                  | MOR                  | 3.04               | 2.88                 | 2.96                 |
|                                  | PCV                  | Reff               | 11.42                | 6.43                 |
| <b>Model comparison</b>          |                      |                    |                      |                      |
|                                  | Log likelihood ratio | -100585            | -92108               | -97815               |
|                                  | Deviance             | 201,170            | 184,216              | 195,630              |

\* = P-value < 0.05, \*\* = P-value < 0.01,

ICC = Inter cluster correlation coefficient, MOR =Median odds ratio, PCV = proportional change in variance.

AOR=adjusted odds ratio; CI= confidence interval,

226

## 227 Discussion

228 LMICs are increasingly facing the triple burden of malnutrition where women and children are  
 229 among the hardest hit by the burden (34, 35). This study assessed the triple burden of malnutrition  
 230 (co-occurrence of undernutrition, overweight/obesity, and anemia among mother-child pairs) in  
 231 the same household using nationally representative data. The finding showed that the prevalence  
 232 of triple burden found at 11.39 % (95% CI 9.56%, 13.23%), Ethiopia has the lowest (3.54 %)   
 233 prevalence while Mauritania (31.66%) bears the highest. The variation among countries could be  
 234 attributed to differences in socio-economic status, food environment, physical activity, genetic  
 235 factors, health care system strength, national policy, and political commitments.

236 The study revealed that several maternal, child, household, and community-level factors have a  
 237 significant impact on the triple burden of malnutrition among mother-child pairs. It has found a  
 238 parallel correlation between the triple burden of malnutrition and maternal age. The odds of being

1  
2  
3 239 malnourished increase as the age of the mother increases. This is in agreement with previous  
4  
5 240 studies where older mothers bear the highest risk compared to younger ones (31, 36). The possible  
6  
7  
8 241 explanation could be because of reduced physical activity, less energy requirement, and hormonal  
9  
10 242 changes among older mothers. Similarly, mothers who have attended secondary education were  
11  
12 243 more likely to be malnourished (31). A plausible explanation for this could be the shifts from  
13  
14 244 manual labor to more sedentary occupations and the related decline in physical activity.

15  
16  
17 245 Being married reduced the risk of the triple burden of malnutrition. Partners together could  
18  
19 246 generate more money, reduce food insecurity, and tend to take better care of themselves and their  
20  
21 247 children. It is been reported that children in single-parent households suffered from undernutrition  
22  
23 248 significantly more than children brought up by both parents (37, 38). Likewise, this study revealed  
24  
25 249 breastfeeding reduced the triple burden of malnutrition. Breastfeeding plays a vital role in the  
26  
27 250 prevention of different forms of childhood malnutrition (39). Delivery by cesarean section (C-  
28  
29 251 section) delays the timely initiation of breastfeeding and pre-lacteal feeding (40). Previous studies  
30  
31 252 have reported that C-section increases maternal obesity and negatively affect the breastfeeding of  
32  
33 253 children, which results suffer from malnutrition (41, 42). Moreover, malnutrition in children is  
34  
35 254 related to gut microbiota alteration and C-section contributes to microbial alterations in the small  
36  
37 255 intestine (43).

38  
39  
40  
41  
42  
43 256 Our study revealed a parallel relationship between the household wealth quintiles and the triple  
44  
45 257 burden of malnutrition. As household income increases, the odds of malnutrition increase (30, 44).  
46  
47 258 High income could increase the purchasing power for food, influencing the type of foods  
48  
49 259 consumed and the intake of prepared or processed food (34). Economic growth and the food  
50  
51 260 industry's rapid penetration into the market have resulted in diets based on energy-dense and  
52  
53 261 nutrient-poor foods (45). In recent years, the dietary preference in LMICs has changed as the food  
54  
55  
56  
57  
58  
59  
60

1  
2  
3 262 environment is dominated by media advertising and relatively cheap and highly tasty energy-dense  
4  
5 263 foods (46).

6  
7  
8 264 The odds of the triple burden of malnutrition were higher in a household with a family size >10.

9  
10 265 A plausible explanation is that in a household with a large family, providing optimum nutritious

11  
12 266 food to all the family members and children could be difficult (47, 48). Moreover giving proper

13  
14 267 care and time to children and the family could be unlikely and this could lead to malnutrition.

15  
16 268 Likewise, Parity was found a determinant of the triple burden of malnutrition. Higher parity

17  
18 269 increased the odds of malnutrition. The possible explanation could be that women gain weight

19  
20 270 during pregnancy, and weight loss does not occur in the post-partum period (49). This mother's

21  
22 271 obesity/overweight is also correlated with child malnutrition.

23  
24  
25  
26  
27 272 The present study revealed that child age and sex were significant factors for malnutrition. Older

28  
29 273 under-five children were more likely to be malnourished compared to younger ones (50). A

30  
31 274 previous study (51) revealed that there was an increased frequency of parasite infection in older

32  
33 275 children leads to a higher prevalence of malnutrition compared to the younger ones. In addition,

34  
35 276 gender was found a significant determinant of malnutrition where a female child was less likely to

36  
37 277 be malnourished (52). The cause of the gender gap in malnutrition is unknown however, some

38  
39 278 studies argued that male children are known to be more vulnerable than females to diseases

40  
41 279 including lower respiratory infections, diarrhoeal diseases, malaria, and preterm birth. Those

42  
43 280 problems have been reported as factors for undernutrition among young male children (53, 54).

44  
45 281 Others also claimed that boys are more vulnerable to environmental problems while playing, such

46  
47 282 as exposure to toxins and air pollution than girls (55).

48  
49 283 Being rural residents was associated with lower odds of the triple burden of malnutrition. This

50  
51 284 urban-rural difference could be attributable to factors including access to different food types,

1  
2  
3 285 overcrowding and concurrent disease, physical activity, and sedentary lifestyles. Previous studies  
4  
5 286 depicted that urbanization affects the way of life, and access to processed and junk foods could  
6  
7  
8 287 exacerbate malnutrition among women and children (30, 56).  
9

10  
11 288 Our study has some strengths and limitations. It used large nationally representative samples with  
12  
13 289 appropriate statistical modeling. The use of large nationally representative data and multilevel  
14  
15 290 analysis helps to provide more robust estimates of observed associations as well as enhance the  
16  
17  
18 291 generalizability of the results. Despite the strengths, this study used cross-sectional data, which  
19  
20 292 did not indicate a temporal relationship between the factors and triple burden. No important  
21  
22 293 covariates, such as dietary intake, physical activity level, comorbidities, and nutrition status during  
23  
24 294 pregnancy, were incorporated into the study as the DHS did not provide a complete record of these  
25  
26  
27 295 variables.  
28  
29

## 30 296 **Conclusions and recommendations**

31  
32  
33 297 About 1 out of 10 households suffer from the triple burden of malnutrition in low and middle-  
34  
35 298 income countries. This study revealed that several maternal, child, household, and community-  
36  
37 299 level factors have a significant impact on the triple burden of malnutrition among mother-child  
38  
39  
40 300 pairs. The triple burden requires the governments, the scientific and medical communities, and the  
41  
42 301 industry's efforts in changing dietary and lifestyle habits to address all forms of malnutrition and  
43  
44 302 should focus on women's nutrition to break the intergenerational triple burden of malnutrition.  
45

## 46 303 **Abbreviations**

47  
48  
49 304 AOR, Adjusted Odds Ratio; DHSs, Demographic and Health Surveys; ICC, Intra cluster  
50  
51 305 correlation coefficient; LMICs, low and middle-income countries; MOR, median odds ratio; PCV,  
52  
53  
54 306 a proportional change in variance; SDGs, Sustainable Development Goals; WHO, World Health  
55  
56 307 Organization  
57

1  
2  
3 308 **Declarations**  
4

5  
6 309 **Ethics approval and consent to participate**  
7

8 310 Permission to access the data was obtained from the measure DHS program  
9  
10 311 (<http://www.dhsprogram.com>) via online request. The website and the data used were publicly  
11  
12 312 available with no personal identifier. All methods were carried out in accordance with relevant  
13  
14 313 guidelines and regulations.  
15

16  
17  
18 314 **Consent for publication**  
19

20  
21 315 Not applicable.  
22

23  
24 316 **Availability of data and materials**  
25

26 317 Data are available online in a public, open-access repository ([www.measuredhs.com/data](http://www.measuredhs.com/data)).  
27  
28

29  
30 318 **Competing interests**  
31

32 319 The authors declare that they have no competing interests.  
33  
34

35 320 **Funding**  
36

37  
38 321 No funder.  
39

40 322 **Author Contributions**  
41

42  
43 323 Conceptualization: DC. Study design: DC, DGB, MWM, AAK, AZA, MHA, NWT and FMA.  
44  
45 324 Execution: DC, DGB, MWM, AAK, AZA, MHA, NWT and FMA. Acquisition of the data: DC,  
46  
47 325 DGB, MWM, AAK, AZA, MHA, NWT and FMA. Analysis and interpretation: DC, DGB, MWM,  
48  
49 326 AAK, AZA, MHA, NWT and FMA. Writing: DC, DGB, MWM, AAK, AZA, MHA, NWT and  
50  
51 327 FMA. Review and editing: DC, DGB, MWM, AAK, AZA, MHA, NWT and FMA.  
52  
53

54 328 **Acknowledgments**  
55  
56  
57  
58  
59  
60

329 The authors acknowledge the Measure DHS for providing us with the data set.

330

## 331 **References**

- 332 1. Meenakshi J. Trends and patterns in the triple burden of malnutrition in India.  
333 *Agricultural Economics*. 2016;47(S1):115-34.
- 334 2. Hepatology TLG. Obesity: another ongoing pandemic. 2021. p. 411.
- 335 3. Organization WH. Diet, nutrition, and the prevention of chronic diseases: report of a joint  
336 WHO/FAO expert consultation: World Health Organization; 2003.
- 337 4. Tabarés Seisdedos R. Health effects of overweight and obesity in 195 countries over 25  
338 years. *New England Journal of Medicine*, 2017, vol 377, num 1, p 13-27. 2017.
- 339 5. Dai H, Alsalhe TA, Chalghaf N, Riccò M, Bragazzi NL, Wu J. The global burden of  
340 disease attributable to high body mass index in 195 countries and territories, 1990–2017: An  
341 analysis of the Global Burden of Disease Study. *PLoS medicine*. 2020;17(7):e1003198.
- 342 6. Ford ND, Patel SA, Narayan KV. Obesity in low-and middle-income countries: burden,  
343 drivers, and emerging challenges. *Annual review of public health*. 2017;38:145-64.
- 344 7. Mahumud RA, Sahle BW, Owusu-Addo E, Chen W, Morton RL, Renzaho A.  
345 Association of dietary intake, physical activity, and sedentary behaviours with overweight and  
346 obesity among 282,213 adolescents in 89 low and middle income to high-income countries.  
347 *International Journal of Obesity*. 2021;45(11):2404-18.
- 348 8. Heidkamp RA, Piwoz E, Gillespie S, Keats EC, D'Alimonte MR, Menon P, et al.  
349 Mobilising evidence, data, and resources to achieve global maternal and child undernutrition  
350 targets and the Sustainable Development Goals: an agenda for action. *The Lancet*.  
351 2021;397(10282):1400-18.
- 352 9. Osendarp S, Akuoku JK, Black RE, Headey D, Ruel M, Scott N, et al. The COVID-19  
353 crisis will exacerbate maternal and child undernutrition and child mortality in low-and middle-  
354 income countries. *Nature Food*. 2021;2(7):476-84.
- 355 10. World Health Organisation Fact Sheets—Malnutrition. Available online:  
356 <https://www.who.int/news-room/fact-sheets/detail/malnutrition> (accessed on 26 Nov 2022).
- 357 11. Adepoju AA, Allen S. Malnutrition in developing countries: nutrition disorders, a leading  
358 cause of ill health in the world today. *Paediatrics and Child Health*. 2019;29(9):394-400.
- 359 12. Sunguya BF, Zhu S, Mpembeni R, Huang J. Trends in prevalence and determinants of  
360 stunting in Tanzania: an analysis of Tanzania demographic health surveys (1991–2016).  
361 *Nutrition Journal*. 2019;18(1):1-13.
- 362 13. Yang YY, Kaddu G, Ngendahimana D, Barkoukis H, Freedman D, Lubaale YA, et al.  
363 Trends and determinants of stunting among under-5s: evidence from the 1995, 2001, 2006 and  
364 2011 Uganda Demographic and Health Surveys. *Public health nutrition*. 2018;21(16):2915-28.
- 365 14. Singh KJ, Chiero V, Kriina M, Alee NT, Chauhan K. Identifying the trend of persistent  
366 cluster of stunting, wasting, and underweight among children under five years in northeastern  
367 states of India. *Clinical Epidemiology and Global Health*. 2022;18:101158.
- 368 15. Organization. WH. WHO Global Anaemia Estimates, 2021 Edition. Anaemia in Women  
369 and Children. Available online: [https://www.who.](https://www.who.int/data/gho/data/themes/topics/anaemia_in_women_and_children)  
370 [int/data/gho/data/themes/topics/anaemia\\_in\\_women\\_and\\_children](https://www.who.int/data/gho/data/themes/topics/anaemia_in_women_and_children) (accessed on 1 December  
371 2022).

- 1  
2  
3 372 16. Koli HB, Nair MG, Shah MC. Impact of structured pre-natal counselling on early  
4 373 initiation of breast feeding and adherence to exclusive breast feeding: a comparative  
5 374 interventional study. *International Journal of Reproduction, Contraception, Obstetrics and*  
6 375 *Gynecology*. 2021;10(7):2699-704.
- 8 376 17. Scott N, Delpont D, Hainsworth S, Pearson R, Morgan C, Huang S, et al. Ending  
9 377 malnutrition in all its forms requires scaling up proven nutrition interventions and much more: a  
10 378 129-country analysis. *BMC medicine*. 2020;18(1):1-19.
- 11 379 18. Mistry SK, Hossain M, Arora A. Maternal nutrition counselling is associated with  
12 380 reduced stunting prevalence and improved feeding practices in early childhood: a post-program  
13 381 comparison study. *Nutrition Journal*. 2019;18(1):1-9.
- 15 382 19. Norman K, Haß U, Pirlich M. Malnutrition in older adults—recent advances and  
16 383 remaining challenges. *Nutrients*. 2021;13(8):2764.
- 17 384 20. Forgie AJ, Drall KM, Bourque SL, Field CJ, Kozyrskyj AL, Willing BP. The impact of  
18 385 maternal and early life malnutrition on health: a diet-microbe perspective. *BMC medicine*.  
19 386 2020;18(1):1-15.
- 20 387 21. Kirolos A, Goyheneix M, Eliaszk MK, Chisala M, Lissauer S, Gladstone M, et al.  
22 388 Neurodevelopmental, cognitive, behavioural and mental health impairments following childhood  
23 389 malnutrition: a systematic review. *BMJ global health*. 2022;7(7):e009330.
- 24 390 22. Walson JL, Berkley JA. The impact of malnutrition on childhood infections. *Current*  
25 391 *opinion in infectious diseases*. 2018;31(3):231.
- 26 392 23. Castro-Rodríguez DC, Rodríguez-González GL, Menjivar M, Zambrano E. Maternal  
27 393 interventions to prevent adverse fetal programming outcomes due to maternal malnutrition:  
28 394 Evidence in animal models. *Placenta*. 2020;102:49-54.
- 30 395 24. Desyibelew HD, Dadi AF. Burden and determinants of malnutrition among pregnant  
31 396 women in Africa: A systematic review and meta-analysis. *PloS one*. 2019;14(9):e0221712.
- 32 397 25. Sachs JD, Schmidt-Traub G, Mazzucato M, Messner D, Nakicenovic N, Rockström J. Six  
33 398 transformations to achieve the sustainable development goals. *Nature sustainability*.  
34 399 2019;2(9):805-14.
- 35 400 26. Fonseca LM, Domingues JP, Dima AM. Mapping the sustainable development goals  
36 401 relationships. *Sustainability*. 2020;12(8):3359.
- 38 402 27. Siddiqui F, Salam RA, Lassi ZS, Das JK. The intertwined relationship between  
39 403 malnutrition and poverty. *Frontiers in Public Health*. 2020;8:453.
- 40 404 28. Rah JH, Melse-Boonstra A, Agustina R, van Zutphen KG, Kraemer K. The Triple Burden  
41 405 of Malnutrition Among Adolescents in Indonesia. SAGE Publications Sage CA: Los Angeles,  
42 406 CA; 2021. p. S4-S8.
- 43 407 29. Luo H, Zyba SJ, Webb P. Measuring malnutrition in all its forms: An update of the net  
44 408 state of nutrition index to track the global burden of malnutrition at country level. *Global Food*  
45 409 *Security*. 2020;26:100453.
- 47 410 30. Kumar P, Chauhan S, Patel R, Srivastava S, Bansod DW. Prevalence and factors  
48 411 associated with triple burden of malnutrition among mother-child pairs in India: a study based on  
49 412 National Family Health Survey 2015–16. *BMC Public Health*. 2021;21(1):1-12.
- 50 413 31. Sunuwar DR, Singh DR, Pradhan PMS. Prevalence and factors associated with double  
51 414 and triple burden of malnutrition among mothers and children in Nepal: evidence from 2016  
52 415 Nepal demographic and health survey. *BMC Public Health*. 2020;20(1):1-11.

- 1  
2  
3 416 32. Ahinkorah BO, Amadu I, Seidu A-A, Okyere J, Duku E, Hagan Jr JE, et al. Prevalence  
4 417 and factors associated with the triple burden of malnutrition among mother-child pairs in Sub-  
5 418 Saharan Africa. *Nutrients*. 2021;13(6):2050.
- 6 419 33. Kumar P, Chauhan S, Patel R, Srivastava S, Bansod DW. Prevalence and factors  
7 420 associated with triple burden of malnutrition among mother-child pairs in India: a study based on  
8 421 National Family Health Survey 2015–16. *BMC Public Health*. 2021;21:1-12.
- 9 422 34. Popkin BM, Corvalan C, Grummer-Strawn LM. Dynamics of the double burden of  
10 423 malnutrition and the changing nutrition reality. *The Lancet*. 2020;395(10217):65-74.
- 11 424 35. Christian AK, Dake FA. Profiling household double and triple burden of malnutrition in  
12 425 sub-Saharan Africa: Prevalence and influencing household factors. *Public Health Nutrition*.  
13 426 2022;25(6):1563-76.
- 14 427 36. Wong C, Zalilah M, Chua E, Norhasmah S, Chin Y, Siti Nur'Asyura A. Double-burden  
15 428 of malnutrition among the indigenous peoples (Orang Asli) of Peninsular Malaysia. *BMC Public*  
16 429 *Health*. 2015;15(1):1-9.
- 17 430 37. Villena-Esponera MP, Moreno-Rojas R, Molina-Recio G. Food insecurity and the double  
18 431 burden of malnutrition of indigenous refugee Épera Siapidara. *Journal of immigrant and minority*  
19 432 *health*. 2019;21(5):1035-42.
- 20 433 38. Tiwari N. The Influence of Single Parent Environment on Children's Learning and  
21 434 Development.
- 22 435 39. Molitoris J. Breastfeeding during pregnancy and its association with childhood  
23 436 malnutrition and pregnancy loss in low-and middle-income countries. *Lund Papers in Economic*  
24 437 *Demography*. 2018;2018(3):1-81.
- 25 438 40. Raihana S, Alam A, Huda TM, Dibley MJ. Factors associated with delayed initiation of  
26 439 breastfeeding in health facilities: secondary analysis of Bangladesh demographic and health  
27 440 survey 2014. *International Breastfeeding Journal*. 2021;16(1):1-13.
- 28 441 41. Belachew A. Timely initiation of breastfeeding and associated factors among mothers of  
29 442 infants age 0–6 months old in Bahir Dar City, Northwest, Ethiopia, 2017: a community based  
30 443 cross-sectional study. *International breastfeeding journal*. 2019;14(1):1-6.
- 31 444 42. Saaka M, Hammond AY. Caesarean section delivery and risk of poor childhood growth.  
32 445 *Journal of nutrition and metabolism*. 2020;2020.
- 33 446 43. Pekmez CT, Dragsted LO, Brahe LK. Gut microbiota alterations and dietary modulation  
34 447 in childhood malnutrition—the role of short chain fatty acids. *Clinical Nutrition*. 2019;38(2):615-  
35 448 30.
- 36 449 44. Kibria A, Muhammed G, Swasey K, Hasan MZ, Sharmeen A, Day B. Prevalence and  
37 450 factors associated with underweight, overweight and obesity among women of reproductive age  
38 451 in India. *Global health research and policy*. 2019;4(1):1-12.
- 39 452 45. Sekiyama M, Jiang HW, Gunawan B, Dewanti L, Honda R, Shimizu-Furusawa H, et al.  
40 453 Double burden of malnutrition in rural West Java: household-level analysis for father-child and  
41 454 mother-child pairs and the association with dietary intake. *Nutrients*. 2015;7(10):8376-91.
- 42 455 46. Liguori J, Trübswasser U, Pradeilles R, Le Port A, Landais E, Talsma EF, et al. How do  
43 456 food safety concerns affect consumer behaviors and diets in low-and middle-income countries?  
44 457 A systematic review. *Global Food Security*. 2022;32:100606.
- 45 458 47. Drammeh W, Hamid NA, Rohana A. Determinants of household food insecurity and its  
46 459 association with child malnutrition in Sub-Saharan Africa: A review of the literature. *Current*  
47 460 *Research in Nutrition and Food Science Journal*. 2019;7(3):610-23.



- 1  
2  
3 461 48. Serbesa ML, Iffa MT, Geleto M. Factors associated with malnutrition among pregnant  
4 462 women and lactating mothers in Miesso Health Center, Ethiopia. *European Journal of*  
5 463 *Midwifery*. 2019;3.
- 6 464 49. Bhavadharini B, Anjana RM, Deepa M, Jayashree G, Nrutya S, Shobana M, et al.  
7 465 Gestational weight gain and pregnancy outcomes in relation to body mass index in Asian Indian  
8 466 women. *Indian Journal of Endocrinology and Metabolism*. 2017;21(4):588.
- 9 467 50. Sinha RK, Dua R, Bijalwan V, Rohatgi S, Kumar P. Determinants of stunting, wasting,  
10 468 and underweight in five high-burden pockets of four Indian states. *Indian journal of community*  
11 469 *medicine: official publication of Indian Association of Preventive & Social Medicine*.  
12 470 2018;43(4):279.
- 13 471 51. Pal A, Manna S, Dalui R, Mukhopadhyay R, Dhara PC. Undernutrition and associated  
14 472 factors among children aged 5–10 years in West Bengal, India: a community-based cross-  
15 473 sectional study. *Egyptian Pediatric Association Gazette*. 2021;69(1):1-12.
- 16 474 52. Anuradha R, Sivanandham R, Salome SD, Francis R, Roopa D, Sampavi S, et al.  
17 475 Nutritional status of children aged 3-6 years in a rural area of Tamilnadu. *Journal of clinical and*  
18 476 *diagnostic research: JCDR*. 2014;8(10):JC01.
- 19 477 53. Hawkes S, Buse K. Gender and global health: evidence, policy, and inconvenient truths.  
20 478 *The Lancet*. 2013;381(9879):1783-7.
- 21 479 54. Thurstans S, Opondo C, Seal A, Wells J, Khara T, Dolan C, et al. Boys are more likely to  
22 480 be undernourished than girls: a systematic review and meta-analysis of sex differences in  
23 481 undernutrition. *BMJ global health*. 2020;5(12):e004030.
- 24 482 55. Asfaw M, Wondaferash M, Taha M, Dube L. Prevalence of undernutrition and associated  
25 483 factors among children aged between six to fifty nine months in Bule Hora district, South  
26 484 Ethiopia. *BMC Public health*. 2015;15(1):1-9.
- 27 485 56. Nagarkar AM, Kulkarni SS. Obesity and its effects on health in middle-aged women  
28 486 from slums of Pune. *Journal of Mid-life Health*. 2018;9(2):79.

487

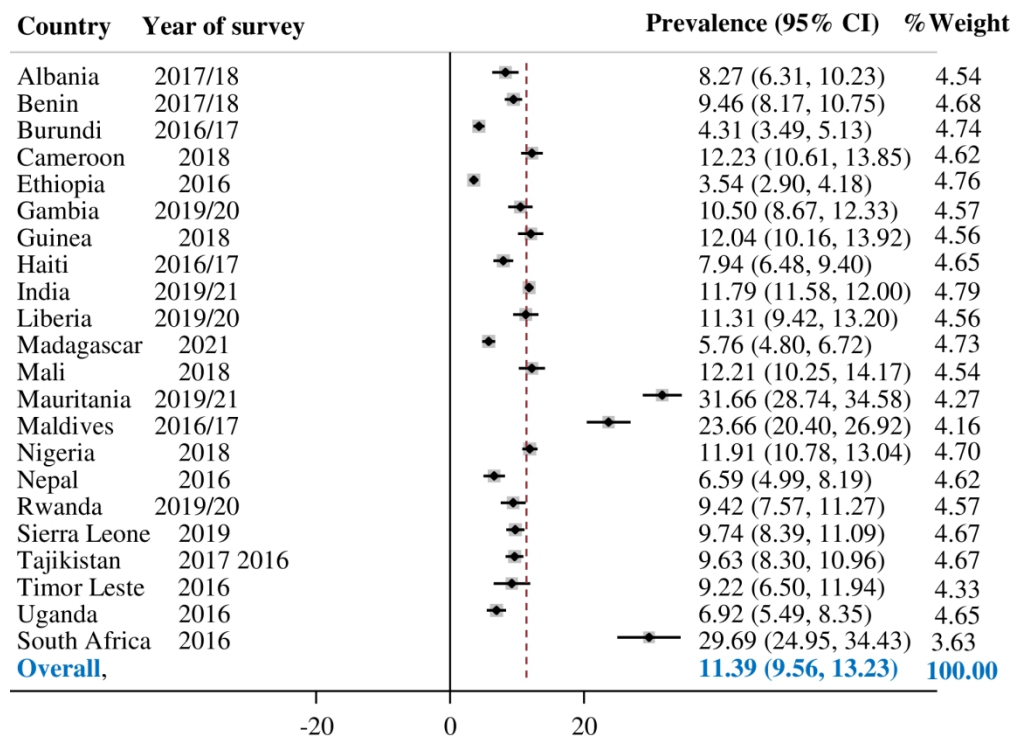

NOTE: Weights are from random-effects model

161x123mm (300 x 300 DPI)

## STROBE Statement—checklist of items that should be included in reports of observational studies

|                              | Item No | Recommendation                                                                                                                                                                                                                                                                                                                                                                                                                                                         | Page No |
|------------------------------|---------|------------------------------------------------------------------------------------------------------------------------------------------------------------------------------------------------------------------------------------------------------------------------------------------------------------------------------------------------------------------------------------------------------------------------------------------------------------------------|---------|
| <b>Title and abstract</b>    | 1       | (a) Indicate the study's design with a commonly used term in the title or the abstract                                                                                                                                                                                                                                                                                                                                                                                 | 1       |
|                              |         | (b) Provide in the abstract an informative and balanced summary of what was done and what was found                                                                                                                                                                                                                                                                                                                                                                    | 2, 3    |
| <b>Introduction</b>          |         |                                                                                                                                                                                                                                                                                                                                                                                                                                                                        |         |
| Background/rationale         | 2       | Explain the scientific background and rationale for the investigation being reported                                                                                                                                                                                                                                                                                                                                                                                   | 4       |
| Objectives                   | 3       | State specific objectives, including any prespecified hypotheses                                                                                                                                                                                                                                                                                                                                                                                                       | 5       |
| <b>Methods</b>               |         |                                                                                                                                                                                                                                                                                                                                                                                                                                                                        |         |
| Study design                 | 4       | Present key elements of study design early in the paper                                                                                                                                                                                                                                                                                                                                                                                                                | 5       |
| Setting                      | 5       | Describe the setting, locations, and relevant dates, including periods of recruitment, exposure, follow-up, and data collection                                                                                                                                                                                                                                                                                                                                        | 5       |
| Participants                 | 6       | (a) <i>Cohort study</i> —Give the eligibility criteria, and the sources and methods of selection of participants. Describe methods of follow-up<br><i>Case-control study</i> —Give the eligibility criteria, and the sources and methods of case ascertainment and control selection. Give the rationale for the choice of cases and controls<br><i>Cross-sectional study</i> —Give the eligibility criteria, and the sources and methods of selection of participants | 7       |
|                              |         | (b) <i>Cohort study</i> —For matched studies, give matching criteria and number of exposed and unexposed<br><i>Case-control study</i> —For matched studies, give matching criteria and the number of controls per case                                                                                                                                                                                                                                                 |         |
| Variables                    | 7       | Clearly define all outcomes, exposures, predictors, potential confounders, and effect modifiers. Give diagnostic criteria, if applicable                                                                                                                                                                                                                                                                                                                               | 7       |
| Data sources/<br>measurement | 8*      | For each variable of interest, give sources of data and details of methods of assessment (measurement). Describe comparability of assessment methods if there is more than one group                                                                                                                                                                                                                                                                                   | 7       |
| Bias                         | 9       | Describe any efforts to address potential sources of bias                                                                                                                                                                                                                                                                                                                                                                                                              |         |
| Study size                   | 10      | Explain how the study size was arrived at                                                                                                                                                                                                                                                                                                                                                                                                                              | 6       |
| Quantitative variables       | 11      | Explain how quantitative variables were handled in the analyses. If applicable, describe which groupings were chosen and why                                                                                                                                                                                                                                                                                                                                           | 7       |
| Statistical methods          | 12      | (a) Describe all statistical methods, including those used to control for confounding                                                                                                                                                                                                                                                                                                                                                                                  | 7,8     |
|                              |         | (b) Describe any methods used to examine subgroups and interactions                                                                                                                                                                                                                                                                                                                                                                                                    |         |
|                              |         | (c) Explain how missing data were addressed                                                                                                                                                                                                                                                                                                                                                                                                                            |         |
|                              |         | (d) <i>Cohort study</i> —If applicable, explain how loss to follow-up was addressed<br><i>Case-control study</i> —If applicable, explain how matching of cases and controls was addressed<br><i>Cross-sectional study</i> —If applicable, describe analytical methods taking account of sampling strategy                                                                                                                                                              |         |
|                              |         | (e) Describe any sensitivity analyses                                                                                                                                                                                                                                                                                                                                                                                                                                  |         |

Continued on next page

1  
2  
3  
4  
5  
6  
7  
8  
9  
10  
11  
12  
13  
14  
15  
16  
17  
18  
19  
20  
21  
22  
23  
24  
25  
26  
27  
28  
29  
30  
31  
32  
33  
34  
35  
36  
37  
38  
39  
40  
41  
42  
43  
44  
45  
46  
47  
48  
49  
50  
51  
52  
53  
54  
55  
56  
57  
58  
59  
60

| <b>Results</b>           |     |                                                                                                                                                                                                                                                                                                                                                                                                               |       |
|--------------------------|-----|---------------------------------------------------------------------------------------------------------------------------------------------------------------------------------------------------------------------------------------------------------------------------------------------------------------------------------------------------------------------------------------------------------------|-------|
| Participants             | 13* | (a) Report numbers of individuals at each stage of study—eg numbers potentially eligible, examined for eligibility, confirmed eligible, included in the study, completing follow-up, and analysed<br>(b) Give reasons for non-participation at each stage<br>(c) Consider use of a flow diagram                                                                                                               | 8     |
| Descriptive data         | 14* | (a) Give characteristics of study participants (eg demographic, clinical, social) and information on exposures and potential confounders<br>(b) Indicate number of participants with missing data for each variable of interest<br>(c) <i>Cohort study</i> —Summarise follow-up time (eg, average and total amount)                                                                                           | 8,9   |
| Outcome data             | 15* | <i>Cohort study</i> —Report numbers of outcome events or summary measures over time<br><i>Case-control study</i> —Report numbers in each exposure category, or summary measures of exposure<br><i>Cross-sectional study</i> —Report numbers of outcome events or summary measures                                                                                                                             | 9     |
| Main results             | 16  | (a) Give unadjusted estimates and, if applicable, confounder-adjusted estimates and their precision (eg, 95% confidence interval). Make clear which confounders were adjusted for and why they were included<br>(b) Report category boundaries when continuous variables were categorized<br>(c) If relevant, consider translating estimates of relative risk into absolute risk for a meaningful time period | 10/12 |
| Other analyses           | 17  | Report other analyses done—eg analyses of subgroups and interactions, and sensitivity analyses                                                                                                                                                                                                                                                                                                                |       |
| <b>Discussion</b>        |     |                                                                                                                                                                                                                                                                                                                                                                                                               |       |
| Key results              | 18  | Summarise key results with reference to study objectives                                                                                                                                                                                                                                                                                                                                                      | 12/15 |
| Limitations              | 19  | Discuss limitations of the study, taking into account sources of potential bias or imprecision. Discuss both direction and magnitude of any potential bias                                                                                                                                                                                                                                                    | 15    |
| Interpretation           | 20  | Give a cautious overall interpretation of results considering objectives, limitations, multiplicity of analyses, results from similar studies, and other relevant evidence                                                                                                                                                                                                                                    | 15    |
| Generalisability         | 21  | Discuss the generalisability (external validity) of the study results                                                                                                                                                                                                                                                                                                                                         | 15    |
| <b>Other information</b> |     |                                                                                                                                                                                                                                                                                                                                                                                                               |       |
| Funding                  | 22  | Give the source of funding and the role of the funders for the present study and, if applicable, for the original study on which the present article is based                                                                                                                                                                                                                                                 |       |

\*Give information separately for cases and controls in case-control studies and, if applicable, for exposed and unexposed groups in cohort and cross-sectional studies.

**Note:** An Explanation and Elaboration article discusses each checklist item and gives methodological background and published examples of transparent reporting. The STROBE checklist is best used in conjunction with this article (freely available on the Web sites of PLoS Medicine at <http://www.plosmedicine.org/>, Annals of Internal Medicine at <http://www.annals.org/>, and Epidemiology at <http://www.epidem.com/>). Information on the STROBE Initiative is available at [www.strobe-statement.org](http://www.strobe-statement.org).

# BMJ Open

## Triple burden of malnutrition among mother-child pairs in low and middle-income countries: A cross-sectional study

|                                 |                                                                                                                                                                                                                                                                                                                                                                                                                                                                                                                                                                                                                                                                                                                                                                                                                                                                                                                                                                            |
|---------------------------------|----------------------------------------------------------------------------------------------------------------------------------------------------------------------------------------------------------------------------------------------------------------------------------------------------------------------------------------------------------------------------------------------------------------------------------------------------------------------------------------------------------------------------------------------------------------------------------------------------------------------------------------------------------------------------------------------------------------------------------------------------------------------------------------------------------------------------------------------------------------------------------------------------------------------------------------------------------------------------|
| Journal:                        | <i>BMJ Open</i>                                                                                                                                                                                                                                                                                                                                                                                                                                                                                                                                                                                                                                                                                                                                                                                                                                                                                                                                                            |
| Manuscript ID                   | bmjopen-2022-070978.R2                                                                                                                                                                                                                                                                                                                                                                                                                                                                                                                                                                                                                                                                                                                                                                                                                                                                                                                                                     |
| Article Type:                   | Original research                                                                                                                                                                                                                                                                                                                                                                                                                                                                                                                                                                                                                                                                                                                                                                                                                                                                                                                                                          |
| Date Submitted by the Author:   | 15-Apr-2023                                                                                                                                                                                                                                                                                                                                                                                                                                                                                                                                                                                                                                                                                                                                                                                                                                                                                                                                                                |
| Complete List of Authors:       | Chilot, Dagmawi; University of Gondar College of Medicine and Health Sciences, Department of Human Physiology<br>Belay, Daniel; University of Gondar College of Medicine and Health Sciences, Department of Human Anatomy<br>Merid, Mehari ; University of Gondar College of Medicine and Health Sciences, Department of Epidemiology and Biostatistics<br>Kibret, Anteneh; University of Gondar College of Medicine and Health Sciences, Department of Human anatomy<br>Alem, Adugnaw ; University of Gondar College of Medicine and Health Sciences, Department of Epidemiology and Bio statistics<br>Asratie, Melaku; University of Gondar College of Medicine and Health Sciences, Department of women and family health<br>Teshager, Nahom ; University of Gondar College of Medicine and Health Sciences, Department of pediatrics<br>Aragaw, Fantu Mamo; University of Gondar College of Medicine and Health Sciences, Department of Epidemiology and Biostatistics |
| <b>Primary Subject Heading</b>: | Epidemiology                                                                                                                                                                                                                                                                                                                                                                                                                                                                                                                                                                                                                                                                                                                                                                                                                                                                                                                                                               |
| Secondary Subject Heading:      | Nutrition and metabolism, Public health                                                                                                                                                                                                                                                                                                                                                                                                                                                                                                                                                                                                                                                                                                                                                                                                                                                                                                                                    |
| Keywords:                       | NUTRITION & DIETETICS, EPIDEMIOLOGY, PUBLIC HEALTH, Health policy < HEALTH SERVICES ADMINISTRATION & MANAGEMENT, Community child health < PAEDIATRICS                                                                                                                                                                                                                                                                                                                                                                                                                                                                                                                                                                                                                                                                                                                                                                                                                      |
|                                 |                                                                                                                                                                                                                                                                                                                                                                                                                                                                                                                                                                                                                                                                                                                                                                                                                                                                                                                                                                            |

SCHOLARONE™  
Manuscripts



I, the Submitting Author has the right to grant and does grant on behalf of all authors of the Work (as defined in the below author licence), an exclusive licence and/or a non-exclusive licence for contributions from authors who are: i) UK Crown employees; ii) where BMJ has agreed a CC-BY licence shall apply, and/or iii) in accordance with the terms applicable for US Federal Government officers or employees acting as part of their official duties; on a worldwide, perpetual, irrevocable, royalty-free basis to BMJ Publishing Group Ltd ("BMJ") its licensees and where the relevant Journal is co-owned by BMJ to the co-owners of the Journal, to publish the Work in this journal and any other BMJ products and to exploit all rights, as set out in our [licence](#).

The Submitting Author accepts and understands that any supply made under these terms is made by BMJ to the Submitting Author unless you are acting as an employee on behalf of your employer or a postgraduate student of an affiliated institution which is paying any applicable article publishing charge ("APC") for Open Access articles. Where the Submitting Author wishes to make the Work available on an Open Access basis (and intends to pay the relevant APC), the terms of reuse of such Open Access shall be governed by a Creative Commons licence – details of these licences and which [Creative Commons](#) licence will apply to this Work are set out in our licence referred to above.

Other than as permitted in any relevant BMJ Author's Self Archiving Policies, I confirm this Work has not been accepted for publication elsewhere, is not being considered for publication elsewhere and does not duplicate material already published. I confirm all authors consent to publication of this Work and authorise the granting of this licence.

# 1 Triple burden of malnutrition among mother-child pairs in low and 2 middle-income countries: A cross-sectional study

3  
4  
5  
6  
7  
8  
9 4 Dagmawi Chilot\*<sup>1</sup>, Daniel Gashaneh Belay<sup>3,4</sup>, Mehari Woldemariam Merid<sup>4</sup>, Anteneh Ayelign  
10 5 Kibret<sup>3</sup>, Adugnaw Zeleke Alem<sup>4</sup>, Melaku Hunie Asratie<sup>5</sup>, Nahom Worku Teshager<sup>6</sup> and Fantu  
11 6 Mamo Aragaw<sup>4</sup>

12  
13  
14  
15 8 <sup>1</sup>Department of Human Physiology, University of Gondar, College of Medicine and Health  
16 9 Science, School of Medicine, Gondar, Ethiopia;

17  
18  
19 10 <sup>3</sup>Department of Human Anatomy, University of Gondar, College of Medicine and Health Science,  
20 11 School of Medicine, Gondar, Ethiopia;

21  
22 12 <sup>4</sup>Department of Epidemiology & Biostatistics, University of Gondar, College of Medicine and  
23 13 Health Science, Institute of Public Health, Gondar, Ethiopia;

24  
25  
26 14 <sup>5</sup>Department of women and family health, University of Gondar, College of Medicine and Health  
27 15 Science, School of Midwifery, Gondar, Ethiopia;

28  
29 16 <sup>6</sup>Department of Pediatrics and Child Health, University of Gondar, College of Medicine and Health  
30 17 Science, School of Medicine, Gondar, Ethiopia;

31  
32  
33  
34  
35 19 Correspondence: Dagmawi Chilot: dagimchilot21@gmail.com. <sup>1</sup>Department of Human  
36 20 Physiology, University of Gondar, College of Medicine and Health Sciences, University of  
37 21 Gondar, P.O. Box 196, Gondar, Ethiopia,

30

**Abstract**

**Objective:** This study aimed to assess the prevalence and determinants of the triple burden of malnutrition among mother-child pairs in low-and middle-income countries.

**Design:** Cross-sectional study

**Setting:** Low-and middle-income countries

**Participants:** Women and children

**Primary outcome:** Triple burden of malnutrition (overweight/obese mother with undernourished and anemic under 5 years child)

**Methods:** Data for this study were drawn from recent 22 low and middle-income countries Demographic and Health Surveys (DHSs). A total weighted sample of 116,795 mother-child pairs was included in the study. STATA version 14.2 was used to clean, code and analyze the data. Multilevel logistic regression was employed to identify factors associated with the problem. Adjusted odds ratio with 95% CI and a P value <0.05 was reported to indicate statistical association. Model fitness and comparison were done using ICC, MOR, PCV, and deviance.

**Result:** The pooled prevalence of the triple burden of malnutrition among mother-child pairs was 11.39%. It showed statistically significant positive associations with mothers aged  $\geq 35$  years (AOR=2.25,95%CI 2.08-2.44), family size >10 (AOR=1.17,95%CI 1.08-1.26), delivery by CS (AOR=1.93,95%CI 1.83-2.03), the richest household (AOR=1.72,95%CI 1.56-1.88), grand multiparous (AOR=1.62, 95% CI 1.46-1.81), age of child 36-47 months (AOR=1.77, 95% CI 1.64-1.90), at a p-value of <0.05. Whereas breastfeeding (AOR=0.94,95%CI 0.89-0.99), married mothers (AOR=0.87,95%CI 0.78-0.96), female children (AOR=0.88,95%CI 0.84-0.92), improved toilet (AOR=0.23,95%CI 0.17-0.29), improved source of drinking water (AOR=0.28,95%CI 0.21-



53 0.35), rural residents (AOR=0.66,95%CI 0.62-0.69) had a contrasting relationship with the triple  
54 burden of malnutrition

55 **Conclusion:** About 1 out of 10 households suffer from the triple burden of malnutrition in low  
56 and middle-income countries. This study revealed that several maternal, child, household, and  
57 community-level factors have a significant impact on the triple burden of malnutrition among  
58 mother-child pairs.

59 **Keywords:** Triple burden, mother-child pairs, malnutrition, low and middle-income countries.

### 60 **Strengths and limitations of this study**

- 61 ➤ The findings were supported by large datasets covering 22 LMICs.
- 62 ➤ We employed multilevel analysis which is an appropriate methodology for such data
- 63 ➤ The data were collected using a common internationally acceptable methodological procedure.
- 64 ➤ DHS used a cross-sectional survey design, and the causal relationship between the triple  
65 burden of malnutrition and the independent variables cannot be established.
- 66 ➤ We didn't include important covariates such as dietary intake, physical activity level, or  
67 comorbidities as the DHS did not collect information on these variables

## 74 **Background**

75 The triple burden of malnutrition, which is the coexistence of overnutrition, undernutrition, and  
76 micronutrient deficiencies is increasing in low and middle-income countries (LMICs) (1). The  
77 World Health Organization (WHO) characterized overnutrition (Obesity and overweight) as a  
78 pandemic of a major public health concern due to the increased frequency of the problem in many  
79 countries (2). It is ranked as the sixth leading cause of disability-adjusted life years (DALYs) and  
80 accounts for approximately 4 million people dying each year worldwide (3-5). Several previous  
81 studies have shown that following marked dietary change, obesity/overweight is increasing more  
82 rapidly in LMICs compared to higher-income countries (6, 7).

83 Similarly, undernutrition continues to be a major public health concern throughout the developing  
84 world (8, 9). Nearly half of all deaths in children under 5 are attributable to undernutrition and it  
85 encompasses wasting, stunting, underweight, and micronutrient deficiencies (anemia) (10, 11).  
86 Despite stunting having declined steadily, faster progress is needed to reach the 2030 target (12,  
87 13). Wasting and underweight persisting at alarming rates, require a reversal in trajectory if the  
88 2030 target is to be achieved (14). Since 2000, a significant reduction in the prevalence of anemia  
89 in children under five has been observed in many LMICs (15). Children are more vulnerable to  
90 inadequate pre-natal, infant, and young child nutrition, particularly in resource-constrained  
91 settings (16, 17). Endorsing early childhood feeding best practices is crucial to improve the health  
92 of children (18).

93 Malnutrition has a tremendous negative impact on the normal functioning of every organ system  
94 (19). It can cause permanent, widespread damage to a child's growth, development, and well-being  
95 (20). Scientific evidence has shown that malnutrition in children is associated with poorer school  
96 performance, increased susceptibility to infections, and slow recovery from illness (21, 22).

1  
2  
3 97 Maternal malnutrition increases the risk of poor pregnancy outcomes including obstructed labor,  
4  
5 98 premature or low-birth-weight babies, and postpartum hemorrhage (23, 24). To reduce the problem  
6  
7  
8 99 the United Nations (UN) adopted the Sustainable Development Goals (SDGs), targeted to end  
9  
10 100 poverty in all its forms everywhere (SDG 1), end hunger, achieve food security, improve nutrition,  
11  
12 101 promote sustainable agriculture (SDG 2), ensure healthy lives, and promote well-being for all at  
13  
14 102 all ages (SDG 3) (25, 26).

15  
16  
17 103 Previous literature recognized the basic and underlying causes of malnutrition including the  
18  
19 104 environmental, economic, and sociopolitical contextual factors, with poverty having a central role  
20  
21 105 (11, 27-29). The triple burden of malnutrition among mother-child pairs is a relatively new issue  
22  
23 106 and only a few country-based studies explored the problem which couldn't give a panoramic view  
24  
25 107 of the problem in LMICs (30-32). Given the persistent and high levels of the problem in these  
26  
27 108 countries, there is a strong need for action. To design and deliver effective interventions adequate  
28  
29 109 understanding of the socioeconomic, environmental, and cultural factors is highly important.  
30  
31 110 Besides if the SDG targets are to be met, coordinated action is required toward not only sustaining  
32  
33 111 current rates of decline but also accelerating progress. Therefore, the objective of this study was  
34  
35 112 to assess the prevalence of the triple burden of malnutrition among mothers and children and the  
36  
37 113 potential factors associated with it in low and middle-income countries.  
38  
39  
40  
41  
42  
43

## 44 **Materials and methods**

### 45 **Study design, setting, and period**

46  
47 115 The present study is based on 22 low and middle-income countries that have had Demographic  
48  
49 116 and Health Surveys (DHS) from 2016-2020. The DHS used a cross-sectional survey study design  
50  
51 117 to collect data and provide population and health indicators at the national level. The list of those  
52  
53 118 countries and the respective year of surveys is provided in Table 1.  
54  
55  
56 119

120 Table 1. Study setting and year of surveys

| Country      | Year of survey | Region              |
|--------------|----------------|---------------------|
| Albania      | 2017/18        | Southeastern Europe |
| Benin        | 2017/18        | West Africa         |
| Burundi      | 2016/17        | East-central Africa |
| Cameroon     | 2018           | West-central Africa |
| Ethiopia     | 2016           | East Africa         |
| Gambia       | 2019/20        | West Africa         |
| Guinea       | 2018           | West Africa         |
| Haiti        | 2016/17        | Caribbean           |
| India        | 2019/21        | South Asia          |
| Liberia      | 2019/20        | West Africa         |
| Madagascar   | 2021           | East Africa         |
| Mali         | 2018           | West Africa         |
| Mauritania   | 2019/21        | Northwest Africa    |
| Maldives     | 2016/17        | South Asia          |
| Nigeria      | 2018           | West Africa         |
| Nepal        | 2016           | South Asia          |
| Rwanda       | 2019/20        | East Africa         |
| Sierra Leone | 2019           | West Africa         |
| Tajikistan   | 2017           | Central Asia        |
| Timor Leste  | 2016           | South Asia          |
| Uganda       | 2016           | East Africa         |
| South Africa | 2016           | South Africa        |

121

122 **Data source and sampling procedure**

123 The current analysis was based on pooled data from DHSs in 22 LMICs. These are nationally

124 representative surveys that collect data on reproductive, maternal, neonatal, child health, and

125 nutrition in LMIC. The surveys are similarly designed that used standardized questionnaires and

126 data collection procedures, allowing therefore comparability of results. The survey employed a

127 two-stage cluster sampling technique. In the first stage, the selection of proportional

128 clusters/enumeration areas was performed using each country's most recent population and

129 housing census as a sampling frame. In the second stage, a systematic selection of households from

130 the newly created cluster was performed. A detailed description of the DHS sampling design and

131 data collection procedures has been found in each country's DHS report. The study population for

1  
2  
3 132 this study was mother-child pairs. Weighting was done using the complex sample design weighting  
4  
5 133 and the “svyset” Stata command was applied. Variables v005 (sampling weight), v021 (primary  
6  
7 134 sampling unit), and v023 (stratification used in sample design) were used, and as the result, a total  
8  
9 135 weighted sample of 116,795 mother-child pairs was included in the analysis.  
10  
11

## 12 136 **Definition of variables**

### 13 14 15 137 **Outcome variable:**

16  
17 138 The triple burden of malnutrition was the outcome variable of this study where the mother was  
18  
19 139 overweight/obese and children under 5 years of age were undernourished and anemic (31, 33). At  
20  
21 140 the same household level, first, we created four different categories of malnutrition such as  
22  
23 141 overweight/obese mother and stunted child, overweight/obese mother and wasted child,  
24  
25 142 overweight/obese mother and underweight child, and overweight/obese mother and anemic child.  
26  
27 143 Then we further combined overweight/obese mothers, undernourished children, and anemic  
28  
29 144 children to generate the triple burden of malnutrition. Categorization was made based on height-  
30  
31 145 for-age z-score (HAZ), standard deviations (SD), weight-for-height z-score (WHZ), weight-for-  
32  
33 146 age z-score (WAZ), hemoglobin level, and body mass index (BMI).  
34  
35

36 147 Stunting dichotomized and coded into 0=Not stunted (HAZ  $\geq$  -2SD and above) & 1= Stunted  
37  
38 148 (HAZ  $<$  -2SD);  
39  
40

41 149 Wasting dichotomized and coded into 0=Not wasted (WHZ  $\geq$  -2SD to +2SD) and 1=Wasted  
42  
43 150 (WHZ  $<$  -2SD);  
44  
45

46 151 Underweight dichotomized and coded into 0= Not underweight (WHZ  $\geq$  -2SD and above) & 1=  
47  
48 152 Underweight (WAZ  $<$  -2SD);  
49  
50

51 153 Child anemia dichotomized and coded into 0= Not anemic (hemoglobin level  $>$  11 g/dl), & 1=  
52  
53 154 Anemic (hemoglobin level  $<$  11 g/dl);  
54  
55  
56  
57  
58  
59  
60

1  
2  
3 155 Mother's BMI dichotomized and coded into 0= Normal (18.5–24.9 kg/m<sup>2</sup>) &  
4  
5 156 1= Overweight/Obese ( $\geq 25$  kg/m<sup>2</sup>)  
6

7  
8 157 The triple burden of malnutrition was dichotomized and coded into 0= NO (not overweight/obese  
9  
10 158 mother and not undernourished child plus not anemic child, and 1= YES (overweight/obese mother  
11  
12 159 and undernourished child plus anemic child)  
13

14  
15 160 An undernourished child is a child who is stunted or wasted or underweight.  
16

### 17 161 **Independent variables:**

18  
19 162 Based on previous works of literature and the likelihood of influencing the outcome of interest,  
20  
21 163 several explanatory variables including the age of mothers, mother's education, marital status,  
22  
23 164 current breastfeeding, delivery by cesarean section, family size, wealth index, media access, parity,  
24  
25 165 age of the child, sex of the child, type of toilet facility, source of drinking water, residence and  
26  
27 166 distance to health facility were considered.  
28  
29

### 30 31 167 **Statistical analyses**

32  
33 168 We append the dataset of each country to generate pooled data. The data extraction, coding, and  
34  
35 169 analysis were carried out using STATA software version 14.2. We weighted the sample to restore  
36  
37 170 the representativeness of the sample so that the total sample looks like the country's actual  
38  
39 171 population. Due to the hierarchical nature of the DHS, the multilevel analysis was fitted to identify  
40  
41 172 significantly associated factors. Four models were fitted; the null model (with no predictors),  
42  
43 173 model I (adjusted for individual-level variables only), model II (adjusted for community-level  
44  
45 174 variables only), and model III (model adjustment for both individual and community-level  
46  
47 175 variables simultaneously). Adjusted OR (AOR) with 95% CI and  $p < 0.05$  were used to determine  
48  
49 176 significant predictors. Model fitness and comparison were done using Intraclass Correlation  
50  
51  
52  
53  
54  
55  
56  
57  
58  
59  
60

1  
2  
3 177 Coefficient (ICC), Proportional Change in Variance (PCV), Median Odds Ratio (MOR), the  
4  
5 178 Likelihood Ratio test (LR), and deviance computed.  
6  
7

8 179

## 10 180 **Patient and public involvement statement**

11  
12 181 As our study used secondary analysis of DHS data, participants and the public were not involved  
13  
14 182 in the study design or planning of the study. The study participants were not consulted to interpret  
15  
16 183 the results and write or editing of this document for readability or accuracy.  
17  
18  
19

## 20 184 **Results**

### 21 185 **Demographics and socioeconomic characteristics**

22  
23 186 A total of 116,795 mother-child pairs were included in the study. Over half (56.48%) of mothers  
24  
25 187 were in the age category of 25-34 years. About 22.98% of mothers were illiterate and the majority  
26  
27 188 (46.39%) had attended secondary education. Approximately 95.73% of mothers were married and  
28  
29 189 62.89% were currently breastfeeding. About 20.33% and 21.21% of the households were in the  
30  
31 190 low wealth quintile of poorest and poorer respectively. Over a quarter (27.62%) of the families  
32  
33 191 had never been exposed to any type of media. The majority of the children (32.59%) were aged  
34  
35 192  $\leq 12$  months. A large proportion (83.60%) of the households had improved sources of drinking  
36  
37 193 water and almost two-thirds (67.02%) of the households had improved toilet facilities. Almost  
38  
39 194 three fourth (71.03%) of participants lived in rural areas and for over a quarter (27.42%) of those  
40  
41 195 participants, the distance to access health facilities was a big problem (**Table 2**).  
42  
43  
44  
45  
46  
47  
48

49 196 Table 2. Socio-demographic characteristics of the study participants

| Variables      | Categories | Unweighted frequency (%) | Weighted frequency (%) |
|----------------|------------|--------------------------|------------------------|
| Age of mothers | 15-24      | 34,983 (29.05)           | 35,918 (30.75)         |
|                | 25-34      | 68,386 (56.78)           | 65,971 (56.48)         |

|                               |                   |                 |                 |
|-------------------------------|-------------------|-----------------|-----------------|
|                               | ≥35               | 17,073 (14.18)  | 14,906 (12.76)  |
| Mothers education             | No education      | 27,995 (23.24)  | 26,845 (22.98)  |
|                               | Primary education | 19,684 (16.34)  | 18,633 (15.95)  |
|                               | Secondary         | 57,008 (47.33)  | 54,185 (46.39)  |
|                               | Higher            | 15,755 (13.08)  | 17,131 (14.67)  |
| Mothers marital status        | Not in union      | 5,583 (4.64)    | 4,987 (4.27)    |
|                               | Married           | 114,859 (95.36) | 111,807 (95.73) |
| Currently breastfeeding       | No                | 44,160 (36.66)  | 43,338 (37.11)  |
|                               | Yes               | 76,282 (63.34)  | 73,457 (62.89)  |
| Delivery by cesarean section  | No                | 99,291 (82.49)  | 93,974 (80.51)  |
|                               | Yes               | 21,077 (17.51)  | 22,748 (19.49)  |
| Family size                   | ≤5                | 56,365 (46.80)  | 53,677 (45.96)  |
|                               | 6-10              | 54,605 (45.34)  | 53,258 (45.60)  |
|                               | >10               | 9,472 (7.86)    | 9,859 (8.44)    |
| Wealth index                  | Poorest           | 28,097 (23.33)  | 23,749 (20.33)  |
|                               | Poorer            | 27,352 (22.71)  | 24,774 (21.21)  |
|                               | Middle            | 24,741 (20.54)  | 24,330 (20.83)  |
|                               | Richer            | 22,180 (18.42)  | 23,880 (20.45)  |
|                               | Richest           | 18,072 (15.00)  | 20,061 (17.18)  |
| Media access                  | No                | 33,942 (28.18)  | 32,256 (27.62)  |
|                               | Yes               | 86,500 (71.82)  | 84,539 (72.38)  |
| Parity                        | Primiparous       | 36,241 (30.09)  | 35,333 (30.25)  |
|                               | Multiparous       | 76,092 (63.18)  | 73,823 (63.21)  |
|                               | Grand Multiparous | 8,109 (6.73)    | 7,639 (6.54)    |
| Age of child                  | ≤12               | 38,959 (32.35)  | 38,059 (32.59)  |
|                               | 13-23             | 25,382 (21.07)  | 24,819 (21.25)  |
|                               | 24-35             | 22,208 (18.44)  | 21,478 (18.39)  |
|                               | 36-47             | 17,948 (14.90)  | 17,204 (14.73)  |
|                               | 48-59             | 15,945 (13.24)  | 15,234 (13.04)  |
| Sex of child                  | Male              | 63,660 (52.86)  | 62,008 (53.09)  |
|                               | Female            | 56,782 (47.14)  | 54,787 (46.91)  |
| Type of toilet facility       | Unimproved        | 37,519 (31.15)  | 38,518 (32.98)  |
|                               | Improved          | 82,923 (68.85)  | 78,277 (67.02)  |
| Source of drinking water      | Unimproved        | 20,959 (17.40)  | 19,159 (16.40)  |
|                               | Improved          | 99,483 (82.60)  | 97,636 (83.60)  |
| Residence                     | Urban             | 28,722 (23.85)  | 33,838 (28.97)  |
|                               | Rural             | 91,720 (76.15)  | 82,957 (71.03)  |
| Distance to a health facility | No problem        | 84,605 (70.25)  | 84,776 (72.58)  |
|                               | Big problem       | 35,837 (29.75)  | 32,019 (27.42)  |

197

198 **Prevalence of triple burden of malnutrition**



199 In 22 low and middle-income countries, the pooled prevalence of the triple burden of malnutrition  
200 among mother-child pairs was found at 11.39 % (95% CI 9.56%, 13.23%). Ethiopia has the lowest  
201 (3.54 %) prevalence of triple burden while Mauritania (31.66%) bears the highest (**Figure 1**).

202 Fig 1. The pooled prevalence of the triple burden of malnutrition

## 203 **Multilevel analyses**

### 204 **Random parameter estimation and model selection**

205 Based on the result of random effect analysis, the ICC of the null model was 0.30, indicating that  
206 30% of the total variability in triple burden prevalence was attributable to between-cluster  
207 variability, while about 70% was due to individual differences. The null model MOR was 3.04,  
208 which indicates that a mother/child from a cluster with a high triple burden prevalence has a 3.04  
209 times higher probability of being malnourished than a mother/child from a cluster with a lower  
210 prevalence. Model III was the best-fitted model since it has the highest log likelihood (-91665)  
211 and the lowest deviance (183,330) value (**Table 3**).

### 212 **Factors associated with the triple burden of malnutrition (Fixed effects)**

213 The triple burden of malnutrition was statistically significant with mothers aged 25-34 years  
214 (AOR=1.54, 95% CI 1.45 - 1.63),  $\geq 35$  years (AOR=2.25, 95% CI 2.08 - 2.44), mothers attended  
215 secondary education (AOR=1.08, 95% CI 1.02-1.15), family size >10 (AOR=1.17, 95% CI 1.08 -  
216 1.26), delivery by CS (AOR=1.93, 95% CI 1.83 - 2.03), the richer household (AOR=1.63, 95% CI  
217 1.49 - 1.76), the richest household (AOR=1.72, 95% CI 1.56 - 1.88), multiparous (AOR=1.42,  
218 95% CI 1.34 - 1.49), grand multiparous (AOR=1.62, 95% CI 1.46 - 1.81), age of child 36-47  
219 months (AOR=1.77, 95% CI 1.64 - 1.90), age of child 48-59 (AOR=1.51, 95% CI 1.39 - 1.64),  
220 breastfeeding (AOR=0.94, 95% CI 0.89 - 0.99), married mothers (AOR=0.87, 95% CI 0.78 - 0.96),

221 female children (AOR=0.88, 95% CI 0.84 - 0.92), improved toilet facility (AOR=0.23, 95% CI  
 222 0.17 - 0.29), improved source of drinking water (AOR=0.28, 95% CI 0.21 - 0.35), rural residents  
 223 (AOR=0.66, 95% CI 0.62 - 0.69) at a p-value of <0.05 (**Table 3**).

224

225 Table 3. Multivariable multilevel logistic regression analysis of the triple burden of malnutrition.

| Variables               | Categories        | Null model           | Model I |        | Model II |                      | Model III |        |
|-------------------------|-------------------|----------------------|---------|--------|----------|----------------------|-----------|--------|
|                         |                   |                      | AOR     | 95% CI | AOR      | 95% CI               | AOR       | 95% CI |
| Age of mothers          | 15-24             | 1.00                 |         |        |          |                      | 1.00      |        |
|                         | 25-34             | 1.54 (1.46 - 1.63)** |         | —      |          | 1.54 (1.45 - 1.63)** |           |        |
|                         | ≥35               | 2.28 (2.11 - 2.47)** |         | —      |          | 2.25 (2.08 - 2.44)** |           |        |
| Mothers education       | No education      | 1.00                 |         |        |          | 1.00                 |           |        |
|                         | Primary education | 1.04 (0.97 - 1.12)   |         | —      |          | 1.04 (0.97 - 1.12)   |           |        |
|                         | Secondary         | 1.08 (1.01 - 1.15)*  |         | —      |          | 1.08 (1.02 - 1.15)*  |           |        |
|                         | Higher            | 0.94 (0.86 - 1.02)   |         | —      |          | 0.94 (0.86 - 1.02)   |           |        |
| Mothers marital status  | Not in union      | 1.00                 |         |        |          | 1.00                 |           |        |
|                         | Married           | 0.83 (0.75 - 0.93)*  |         | —      |          | 0.87 (0.78 - 0.96)** |           |        |
| Currently breastfeeding | No                | 1.00                 |         |        |          | 1.00                 |           |        |
|                         | Yes               | 0.92 (0.87 - 0.97)*  |         | —      |          | 0.94 (0.89 - 0.99)*  |           |        |
| Delivery by CS          | No                | 1.00                 |         |        |          | 1.00                 |           |        |
|                         | Yes               | 1.94 (1.84 - 2.04)** |         | —      |          | 1.93 (1.83 - 2.03)** |           |        |
| Family size             | ≤5                | 1.00                 |         |        |          | 1.00                 |           |        |
|                         | 6-10              | 1.00 (0.97 - 1.08)   |         | —      |          | 1.01 (0.98 - 1.08)   |           |        |
|                         | >10               | 1.14 (1.06 - 1.24)** |         | —      |          | 1.17 (1.08 - 1.26)** |           |        |
| Wealth index            | Poorest           | 1.00                 |         |        |          | 1.00                 |           |        |
|                         | Poorer            | 1.41 (1.31 - 1.52)** |         | —      |          | 1.38 (1.28 - 1.49)** |           |        |
|                         | Middle            | 1.60 (1.48 - 1.73)** |         | —      |          | 1.49 (1.38 - 1.62)** |           |        |
|                         | Richer            | 1.86 (1.72 - 2.02)** |         | —      |          | 1.63 (1.49 - 1.76)** |           |        |
|                         | Richest           | 2.15 (1.97 - 2.35)** |         | —      |          | 1.72 (1.56 - 1.88)** |           |        |
| Media access            | No                | 1.00                 |         |        |          | 1.00                 |           |        |
|                         | Yes               | 1.01 (0.98 - 1.08)   |         | —      |          | 1.02 (0.99 - 1.11)   |           |        |
| Parity                  | Primiparous       | 1.00                 |         |        |          | 1.00                 |           |        |
|                         | Multiparous       | 1.42 (1.34 - 1.50)** |         | —      |          | 1.42 (1.34 - 1.49)** |           |        |
|                         | Grand Multiparous | 1.61 (1.44 - 1.79)** |         | —      |          | 1.62 (1.46 - 1.81)** |           |        |
| Age of child            | ≤12               | 1.00                 |         |        |          | 1.00                 |           |        |
|                         | 13-23             | 1.41 (1.32 - 1.50)** |         | —      |          | 1.41 (1.32 - 1.50)** |           |        |
|                         | 24-35             | 1.62 (1.52 - 1.73)** |         | —      |          | 1.63 (1.53 - 1.74)** |           |        |
|                         | 36-47             | 1.75 (1.62 - 1.89)** |         | —      |          | 1.77 (1.64 - 1.90)** |           |        |
|                         | 48-59             | 1.50 (1.38 - 1.62)** |         | —      |          | 1.51 (1.39 - 1.64)** |           |        |
| Sex of child            | Male              | 1.00                 |         |        |          | 1.00                 |           |        |
|                         | Female            | 0.88 (0.84 - 0.92)** |         | —      |          | 0.88 (0.84 - 0.92)** |           |        |

|                                  |                      |                    |                      |                      |
|----------------------------------|----------------------|--------------------|----------------------|----------------------|
| Type of toilet facility          | Unimproved           | 1.00               |                      | 1.00                 |
|                                  | Improved             | 0.24 (0.18 - 1.31) | —                    | 0.23 (0.17 - 0.29)** |
| Source of drinking water         | Unimproved           | 1.00               |                      | 1.00                 |
|                                  | Improved             | 0.21 (0.16 - 0.28) | —                    | 0.28 (0.21 - 0.35)** |
| <b>Community-level variables</b> |                      |                    |                      |                      |
| Residence                        | Urban                |                    | 1.00                 | 1.00                 |
|                                  | Rural                | —                  | 0.49 (0.46 - 0.52)** | 0.66 (0.62 - 0.69)** |
| Distance to a health facility    | No problem           |                    | 1.00                 | 1.00                 |
|                                  | Big problem          | —                  | 0.87 (0.82 - 0.91)** | 0.94 (0.89 - 0.98)** |
| <b>Random effect</b>             |                      |                    |                      |                      |
|                                  | Variance             | 1.40               | 1.24                 | 1.31                 |
|                                  | ICC                  | 0.30               | 0.27                 | 0.28                 |
|                                  | MOR                  | 3.04               | 2.88                 | 2.96                 |
|                                  | PCV                  | Reff               | 11.42                | 6.43                 |
| <b>Model comparison</b>          |                      |                    |                      |                      |
|                                  | Log likelihood ratio | -100585            | -92108               | -97815               |
|                                  | Deviance             | 201,170            | 184,216              | 195,630              |

\* = P-value < 0.05, \*\* = P-value < 0.01,

ICC = Inter cluster correlation coefficient, MOR =Median odds ratio, PCV = proportional change in variance.

AOR=adjusted odds ratio; CI= confidence interval,

226

## 227 Discussion

228 LMICs are increasingly facing the triple burden of malnutrition where women and children are  
 229 among the hardest hit by the problem (34, 35). This study assessed the triple burden of malnutrition  
 230 (co-occurrence of undernutrition, overweight/obesity, and anemia among mother-child pairs) in  
 231 the same household, using nationally representative data in LMICs. The result showed that the  
 232 pooled prevalence of triple burden was 11.39 % (95% CI 9.56%, 13.23%); Ethiopia had the lowest  
 233 (3.54 %) prevalence while Mauritania (31.66%) had the highest. The variation among countries  
 234 could be attributed to differences in socio-economic status, food environment, physical activity,  
 235 genetic factors, health care system strength, national policy, and political commitments.

236 The study revealed that several maternal, child, household, and community-level factors have a  
 237 significant impact on the triple burden of malnutrition among mother-child pairs. It has found a  
 238 parallel correlation between the triple burden of malnutrition and maternal age. The odds of being

1  
2  
3 239 malnourished increase as the age of the mother increases. This is in agreement with previous  
4  
5 240 studies where older mothers bear the highest risk compared to younger ones (31, 36). The possible  
6  
7 241 explanation could be because of reduced physical activity, less energy requirement, and hormonal  
8  
9 242 changes among older mothers. Similarly, mothers who have attended secondary education were  
10  
11 243 more likely to be malnourished (31). A plausible explanation for this could be the shifts from  
12  
13 244 manual labor to more sedentary occupations and the related decline in physical activity.  
14  
15

16  
17 245 Being married reduced the risk of the triple burden of malnutrition. Partners together could  
18  
19 246 generate more money, reduce food insecurity, and tend to take better care of themselves and their  
20  
21 247 children. It is been reported that children in single-parent households suffered from undernutrition  
22  
23 248 significantly more than children brought up by both parents (37, 38). Likewise, this study revealed  
24  
25 249 breastfeeding reduced the triple burden of malnutrition. Breastfeeding plays a vital role in the  
26  
27 250 prevention of different forms of childhood malnutrition (39). However, delivery by cesarean  
28  
29 251 section (C-section) delays the timely initiation of breastfeeding and pre-lacteal feeding (40).  
30  
31 252 Previous studies have reported that C-section increases maternal obesity and negatively affect the  
32  
33 253 breastfeeding of children, which results in malnutrition (41, 42). Moreover, malnutrition in  
34  
35 254 children is related to gut microbiota alteration and C-section contributes to microbial alterations in  
36  
37 255 the small intestine (43).  
38  
39  
40  
41  
42

43 256 Our study revealed a parallel relationship between the household wealth quintiles and the triple  
44  
45 257 burden of malnutrition. As household income increases, the odds of malnutrition increase (30, 44).  
46  
47 258 High income could increase the purchasing power for food, influencing the type of foods  
48  
49 259 consumed and the intake of prepared or processed food (34). Economic growth and the food  
50  
51 260 industry's rapid penetration into the market have resulted to depend on energy-dense and nutrient-  
52  
53  
54  
55  
56  
57

1  
2  
3 261 poor foods (45). In recent years, the dietary preference in LMICs has changed as the food  
4  
5 262 environment is dominated by media advertising, and relatively cheap, energy-dense foods (46).  
6  
7

8 263 The odds of the triple burden of malnutrition were higher in a household with a family size >10.  
9

10 264 A plausible explanation is that in a household with a large family, providing optimum nutritious  
11

12 265 food to all the family members and children could be difficult (47, 48). Moreover giving proper  
13

14 266 care and time to children and the family could be unlikely and this could lead to malnutrition.  
15

16 267 Likewise, parity was found to be a determinant of the triple burden of malnutrition. Higher parity  
17

18 268 increased the odds of malnutrition. The possible explanation could be that women could gain  
19

20 269 weight during pregnancy, and weight loss might not occur in the post-partum period which could  
21

22 270 lead to child malnutrition. (49).  
23  
24  
25

26 271 The present study revealed that child age and sex were significant factors for malnutrition. Older  
27

28 272 under-five children were more likely to be malnourished compared to younger ones (50). A  
29

30 273 previous study (51) revealed that there was an increased frequency of parasite infection in older  
31

32 274 children leading to a higher prevalence of malnutrition compared to the younger ones. In addition,  
33

34 275 gender was found a significant determinant of malnutrition where a female child was less likely to  
35

36 276 be malnourished (52). The cause of the gender gap in malnutrition is unknown, however, some  
37

38 277 studies argued that male children are known to be more vulnerable than females to diseases  
39

40 278 including lower respiratory infections, diarrhoeal diseases, malaria, and preterm birth. Those  
41

42 279 diseases have been reported as factors for undernutrition among young male children (53, 54).  
43

44 280 Others also claimed that boys are more vulnerable to environmental problems while playing, such  
45

46 281 as exposure to toxins and air pollution than girls (55).  
47  
48  
49

50 282 Being rural residents was associated with lower odds of the triple burden of malnutrition. The  
51

52 283 urban-rural difference could be attributable to factors including access to different food types,  
53  
54  
55

1  
2  
3 284 overcrowding, concurrent disease, and sedentary lifestyles. Previous studies depicted that  
4  
5 285 urbanization affects the way of life, access to processed and junk foods could exacerbate  
6  
7  
8 286 malnutrition among women and children (30, 56).  
9

10  
11 287 Our study has some strengths and limitations. It used large nationally representative samples with  
12  
13 288 appropriate statistical modeling. The use of large nationally representative data and multilevel  
14  
15 289 analysis helps to provide more robust estimates of observed associations as well as enhance the  
16  
17 290 generalizability of the results. Despite the strengths, this study used cross-sectional data, which  
18  
19 291 did not indicate a temporal relationship between the factors and triple burden. No important  
20  
21 292 covariates, such as dietary intake, physical activity level, comorbidities, and nutrition status during  
22  
23 293 pregnancy, were incorporated into the study as the DHS did not provide a complete record of these  
24  
25  
26 294 variables.  
27  
28  
29

## 30 295 **Conclusions and recommendations**

31

32 296 About 1 out of 10 households suffer from the triple burden of malnutrition in low and middle-  
33  
34 297 income countries. This study revealed that several maternal, child, household, and community-  
35  
36 298 level factors have a significant impact on the triple burden of malnutrition among mother-child  
37  
38 299 pairs. The triple burden requires the governments, the scientific and medical communities, and the  
39  
40 300 industry's efforts in changing dietary and lifestyle habits to address all forms of malnutrition and  
41  
42 301 should focus on women's nutrition to break the intergenerational triple burden of malnutrition.  
43  
44  
45

## 46 302 **Abbreviations**

47

48  
49 303 AOR, Adjusted Odds Ratio; DHSs, Demographic and Health Surveys; ICC, Intra cluster  
50  
51 304 correlation coefficient; LMICs, low and middle-income countries; MOR, median odds ratio; PCV,  
52  
53 305 a proportional change in variance; SDGs, Sustainable Development Goals; WHO, World Health  
54  
55  
56 306 Organization  
57

## 307 **Declarations**

### 308 **Ethics approval and consent to participate**

309 Permission to access the data was obtained from the measure DHS program  
310 (<http://www.dhsprogram.com>) via online request. The website and the data used were publicly  
311 available with no personal identifier. All methods were carried out in accordance with relevant  
312 guidelines and regulations.

### 313 **Consent for publication**

314 Not applicable.

### 315 **Availability of data and materials**

316 Data are available online in a public, open-access repository ([www.measuredhs.com/data](http://www.measuredhs.com/data)).

### 317 **Competing interests**

318 The authors declare that they have no competing interests.

### 319 **Funding**

320 No funder.

### 321 **Author Contributions**

322 Conceptualization: DC. Study design: DC, DGB, MWM, AAK, AZA, MHA, NWT, and FMA.

323 Execution: DC, DGB, MWM, AAK, AZA, MHA, NWT, and FMA. Acquisition of the data: DC,

324 DGB, MWM, AAK, AZA, MHA, NWT, and FMA. Analysis and interpretation: DC, DGB,

325 MWM, AAK, AZA, MHA, NWT, and FMA. Writing: DC, DGB, MWM, AAK, AZA, MHA,

326 NWT, and FMA. Review and editing: DC, DGB, MWM, AAK, AZA, MHA, NWT, and FMA.

### 327 **Acknowledgments**

328 The authors acknowledge the Measure DHS for providing us with the data set.

329

## 330 References

- 331 1. Meenakshi J. Trends and patterns in the triple burden of malnutrition in India.  
332 *Agricultural Economics*. 2016;47(S1):115-34.
- 333 2. Hepatology TLG. Obesity: another ongoing pandemic. 2021. p. 411.
- 334 3. Organization WH. Diet, nutrition, and the prevention of chronic diseases: report of a joint  
335 WHO/FAO expert consultation: World Health Organization; 2003.
- 336 4. Tabarés Seisdedos R. Health effects of overweight and obesity in 195 countries over 25  
337 years. *New England Journal of Medicine*, 2017, vol 377, num 1, p 13-27. 2017.
- 338 5. Dai H, Alsalhe TA, Chalghaf N, Riccò M, Bragazzi NL, Wu J. The global burden of  
339 disease attributable to high body mass index in 195 countries and territories, 1990–2017: An  
340 analysis of the Global Burden of Disease Study. *PLoS medicine*. 2020;17(7):e1003198.
- 341 6. Ford ND, Patel SA, Narayan KV. Obesity in low-and middle-income countries: burden,  
342 drivers, and emerging challenges. *Annual review of public health*. 2017;38:145-64.
- 343 7. Mahumud RA, Sahle BW, Owusu-Addo E, Chen W, Morton RL, Renzaho A.  
344 Association of dietary intake, physical activity, and sedentary behaviours with overweight and  
345 obesity among 282,213 adolescents in 89 low and middle income to high-income countries.  
346 *International Journal of Obesity*. 2021;45(11):2404-18.
- 347 8. Heidkamp RA, Piwoz E, Gillespie S, Keats EC, D'Alimonte MR, Menon P, et al.  
348 Mobilising evidence, data, and resources to achieve global maternal and child undernutrition  
349 targets and the Sustainable Development Goals: an agenda for action. *The Lancet*.  
350 2021;397(10282):1400-18.
- 351 9. Osendarp S, Akuoku JK, Black RE, Headey D, Ruel M, Scott N, et al. The COVID-19  
352 crisis will exacerbate maternal and child undernutrition and child mortality in low-and middle-  
353 income countries. *Nature Food*. 2021;2(7):476-84.
- 354 10. World Health Organisation Fact Sheets—Malnutrition. Available online:  
355 <https://www.who.int/news-room/fact-sheets/detail/malnutrition> (accessed on 26 Nov 2022).
- 356 11. Adepoju AA, Allen S. Malnutrition in developing countries: nutrition disorders, a leading  
357 cause of ill health in the world today. *Paediatrics and Child Health*. 2019;29(9):394-400.
- 358 12. Sunguya BF, Zhu S, Mpembeni R, Huang J. Trends in prevalence and determinants of  
359 stunting in Tanzania: an analysis of Tanzania demographic health surveys (1991–2016).  
360 *Nutrition Journal*. 2019;18(1):1-13.
- 361 13. Yang YY, Kaddu G, Ngendahimana D, Barkoukis H, Freedman D, Lubaale YA, et al.  
362 Trends and determinants of stunting among under-5s: evidence from the 1995, 2001, 2006 and  
363 2011 Uganda Demographic and Health Surveys. *Public health nutrition*. 2018;21(16):2915-28.
- 364 14. Singh KJ, Chiero V, Kriina M, Alee NT, Chauhan K. Identifying the trend of persistent  
365 cluster of stunting, wasting, and underweight among children under five years in northeastern  
366 states of India. *Clinical Epidemiology and Global Health*. 2022;18:101158.
- 367 15. Organization. WH. WHO Global Anaemia Estimates, 2021 Edition. Anaemia in Women  
368 and Children. Available online: [https://www.who.](https://www.who.int/data/gho/data/themes/topics/anaemia_in_women_and_children)  
369 [int/data/gho/data/themes/topics/anaemia\\_in\\_women\\_and\\_children](https://www.who.int/data/gho/data/themes/topics/anaemia_in_women_and_children) (accessed on 1 December  
370 2022).



- 1  
2  
3 371 16. Koli HB, Nair MG, Shah MC. Impact of structured pre-natal counselling on early  
4 372 initiation of breast feeding and adherence to exclusive breast feeding: a comparative  
5 373 interventional study. *International Journal of Reproduction, Contraception, Obstetrics and*  
6 374 *Gynecology*. 2021;10(7):2699-704.
- 8 375 17. Scott N, Delpont D, Hainsworth S, Pearson R, Morgan C, Huang S, et al. Ending  
9 376 malnutrition in all its forms requires scaling up proven nutrition interventions and much more: a  
10 377 129-country analysis. *BMC medicine*. 2020;18(1):1-19.
- 11 378 18. Mistry SK, Hossain M, Arora A. Maternal nutrition counselling is associated with  
12 379 reduced stunting prevalence and improved feeding practices in early childhood: a post-program  
13 380 comparison study. *Nutrition Journal*. 2019;18(1):1-9.
- 14 381 19. Norman K, Haß U, Pirlich M. Malnutrition in older adults—recent advances and  
15 382 remaining challenges. *Nutrients*. 2021;13(8):2764.
- 17 383 20. Forgie AJ, Drall KM, Bourque SL, Field CJ, Kozyrskyj AL, Willing BP. The impact of  
18 384 maternal and early life malnutrition on health: a diet-microbe perspective. *BMC medicine*.  
19 385 2020;18(1):1-15.
- 20 386 21. Kirolos A, Goyheneix M, Eliaszk MK, Chisala M, Lissauer S, Gladstone M, et al.  
21 387 Neurodevelopmental, cognitive, behavioural and mental health impairments following childhood  
22 388 malnutrition: a systematic review. *BMJ global health*. 2022;7(7):e009330.
- 23 389 22. Walson JL, Berkley JA. The impact of malnutrition on childhood infections. *Current*  
24 390 *opinion in infectious diseases*. 2018;31(3):231.
- 25 391 23. Castro-Rodríguez DC, Rodríguez-González GL, Menjivar M, Zambrano E. Maternal  
26 392 interventions to prevent adverse fetal programming outcomes due to maternal malnutrition:  
27 393 Evidence in animal models. *Placenta*. 2020;102:49-54.
- 28 394 24. Desyibelew HD, Dadi AF. Burden and determinants of malnutrition among pregnant  
29 395 women in Africa: A systematic review and meta-analysis. *PloS one*. 2019;14(9):e0221712.
- 30 396 25. Sachs JD, Schmidt-Traub G, Mazzucato M, Messner D, Nakicenovic N, Rockström J. Six  
31 397 transformations to achieve the sustainable development goals. *Nature sustainability*.  
32 398 2019;2(9):805-14.
- 33 399 26. Fonseca LM, Domingues JP, Dima AM. Mapping the sustainable development goals  
34 400 relationships. *Sustainability*. 2020;12(8):3359.
- 35 401 27. Siddiqui F, Salam RA, Lassi ZS, Das JK. The intertwined relationship between  
36 402 malnutrition and poverty. *Frontiers in Public Health*. 2020;8:453.
- 37 403 28. Rah JH, Melse-Boonstra A, Agustina R, van Zutphen KG, Kraemer K. The Triple Burden  
38 404 of Malnutrition Among Adolescents in Indonesia. SAGE Publications Sage CA: Los Angeles,  
39 405 CA; 2021. p. S4-S8.
- 40 406 29. Luo H, Zyba SJ, Webb P. Measuring malnutrition in all its forms: An update of the net  
41 407 state of nutrition index to track the global burden of malnutrition at country level. *Global Food*  
42 408 *Security*. 2020;26:100453.
- 43 409 30. Kumar P, Chauhan S, Patel R, Srivastava S, Bansod DW. Prevalence and factors  
44 410 associated with triple burden of malnutrition among mother-child pairs in India: a study based on  
45 411 National Family Health Survey 2015–16. *BMC Public Health*. 2021;21(1):1-12.
- 46 412 31. Sunuwar DR, Singh DR, Pradhan PMS. Prevalence and factors associated with double  
47 413 and triple burden of malnutrition among mothers and children in Nepal: evidence from 2016  
48 414 Nepal demographic and health survey. *BMC Public Health*. 2020;20(1):1-11.

- 1  
2  
3 415 32. Ahinkorah BO, Amadu I, Seidu A-A, Okyere J, Duku E, Hagan Jr JE, et al. Prevalence  
4 416 and factors associated with the triple burden of malnutrition among mother-child pairs in Sub-  
5 417 Saharan Africa. *Nutrients*. 2021;13(6):2050.
- 6 418 33. Kumar P, Chauhan S, Patel R, Srivastava S, Bansod DW. Prevalence and factors  
7 419 associated with triple burden of malnutrition among mother-child pairs in India: a study based on  
8 420 National Family Health Survey 2015–16. *BMC Public Health*. 2021;21:1-12.
- 9 421 34. Popkin BM, Corvalan C, Grummer-Strawn LM. Dynamics of the double burden of  
10 422 malnutrition and the changing nutrition reality. *The Lancet*. 2020;395(10217):65-74.
- 11 423 35. Christian AK, Dake FA. Profiling household double and triple burden of malnutrition in  
12 424 sub-Saharan Africa: Prevalence and influencing household factors. *Public Health Nutrition*.  
13 425 2022;25(6):1563-76.
- 14 426 36. Wong C, Zalilah M, Chua E, Norhasmah S, Chin Y, Siti Nur'Asyura A. Double-burden  
15 427 of malnutrition among the indigenous peoples (Orang Asli) of Peninsular Malaysia. *BMC Public*  
16 428 *Health*. 2015;15(1):1-9.
- 17 429 37. Villena-Esponera MP, Moreno-Rojas R, Molina-Recio G. Food insecurity and the double  
18 430 burden of malnutrition of indigenous refugee Épera Siapidara. *Journal of immigrant and minority*  
19 431 *health*. 2019;21(5):1035-42.
- 20 432 38. Tiwari N. The Influence of Single Parent Environment on Children's Learning and  
21 433 Development.
- 22 434 39. Molitoris J. Breastfeeding during pregnancy and its association with childhood  
23 435 malnutrition and pregnancy loss in low-and middle-income countries. *Lund Papers in Economic*  
24 436 *Demography*. 2018;2018(3):1-81.
- 25 437 40. Raihana S, Alam A, Huda TM, Dibley MJ. Factors associated with delayed initiation of  
26 438 breastfeeding in health facilities: secondary analysis of Bangladesh demographic and health  
27 439 survey 2014. *International Breastfeeding Journal*. 2021;16(1):1-13.
- 28 440 41. Belachew A. Timely initiation of breastfeeding and associated factors among mothers of  
29 441 infants age 0–6 months old in Bahir Dar City, Northwest, Ethiopia, 2017: a community based  
30 442 cross-sectional study. *International breastfeeding journal*. 2019;14(1):1-6.
- 31 443 42. Saaka M, Hammond AY. Caesarean section delivery and risk of poor childhood growth.  
32 444 *Journal of nutrition and metabolism*. 2020;2020.
- 33 445 43. Pekmez CT, Dragsted LO, Brahe LK. Gut microbiota alterations and dietary modulation  
34 446 in childhood malnutrition—the role of short chain fatty acids. *Clinical Nutrition*. 2019;38(2):615-  
35 447 30.
- 36 448 44. Kibria A, Muhammed G, Swasey K, Hasan MZ, Sharmeen A, Day B. Prevalence and  
37 449 factors associated with underweight, overweight and obesity among women of reproductive age  
38 450 in India. *Global health research and policy*. 2019;4(1):1-12.
- 39 451 45. Sekiyama M, Jiang HW, Gunawan B, Dewanti L, Honda R, Shimizu-Furusawa H, et al.  
40 452 Double burden of malnutrition in rural West Java: household-level analysis for father-child and  
41 453 mother-child pairs and the association with dietary intake. *Nutrients*. 2015;7(10):8376-91.
- 42 454 46. Liguori J, Trübswasser U, Pradeilles R, Le Port A, Landais E, Talsma EF, et al. How do  
43 455 food safety concerns affect consumer behaviors and diets in low-and middle-income countries?  
44 456 A systematic review. *Global Food Security*. 2022;32:100606.
- 45 457 47. Drammeh W, Hamid NA, Rohana A. Determinants of household food insecurity and its  
46 458 association with child malnutrition in Sub-Saharan Africa: A review of the literature. *Current*  
47 459 *Research in Nutrition and Food Science Journal*. 2019;7(3):610-23.

- 1  
2  
3 460 48. Serbesa ML, Iffa MT, Geleto M. Factors associated with malnutrition among pregnant  
4 461 women and lactating mothers in Miesso Health Center, Ethiopia. *European Journal of*  
5 462 *Midwifery*. 2019;3.
- 6 463 49. Bhavadharini B, Anjana RM, Deepa M, Jayashree G, Nrutya S, Shobana M, et al.  
7 464 Gestational weight gain and pregnancy outcomes in relation to body mass index in Asian Indian  
8 465 women. *Indian Journal of Endocrinology and Metabolism*. 2017;21(4):588.
- 9 466 50. Sinha RK, Dua R, Bijalwan V, Rohatgi S, Kumar P. Determinants of stunting, wasting,  
10 467 and underweight in five high-burden pockets of four Indian states. *Indian journal of community*  
11 468 *medicine: official publication of Indian Association of Preventive & Social Medicine*.  
12 469 2018;43(4):279.
- 13 470 51. Pal A, Manna S, Dalui R, Mukhopadhyay R, Dhara PC. Undernutrition and associated  
14 471 factors among children aged 5–10 years in West Bengal, India: a community-based cross-  
15 472 sectional study. *Egyptian Pediatric Association Gazette*. 2021;69(1):1-12.
- 16 473 52. Anuradha R, Sivanandham R, Salome SD, Francis R, Roopa D, Sampavi S, et al.  
17 474 Nutritional status of children aged 3-6 years in a rural area of Tamilnadu. *Journal of clinical and*  
18 475 *diagnostic research: JCDR*. 2014;8(10):JC01.
- 19 476 53. Hawkes S, Buse K. Gender and global health: evidence, policy, and inconvenient truths.  
20 477 *The Lancet*. 2013;381(9879):1783-7.
- 21 478 54. Thurstans S, Opondo C, Seal A, Wells J, Khara T, Dolan C, et al. Boys are more likely to  
22 479 be undernourished than girls: a systematic review and meta-analysis of sex differences in  
23 480 undernutrition. *BMJ global health*. 2020;5(12):e004030.
- 24 481 55. Asfaw M, Wondaferash M, Taha M, Dube L. Prevalence of undernutrition and associated  
25 482 factors among children aged between six to fifty nine months in Bule Hora district, South  
26 483 Ethiopia. *BMC Public health*. 2015;15(1):1-9.
- 27 484 56. Nagarkar AM, Kulkarni SS. Obesity and its effects on health in middle-aged women  
28 485 from slums of Pune. *Journal of Mid-life Health*. 2018;9(2):79.

486



NOTE: Weights are from random-effects model

161x123mm (300 x 300 DPI)

## STROBE Statement—checklist of items that should be included in reports of observational studies

|                              | Item No | Recommendation                                                                                                                                                                                                                                                                                                                                                                                                                                                         | Page No |
|------------------------------|---------|------------------------------------------------------------------------------------------------------------------------------------------------------------------------------------------------------------------------------------------------------------------------------------------------------------------------------------------------------------------------------------------------------------------------------------------------------------------------|---------|
| <b>Title and abstract</b>    | 1       | (a) Indicate the study's design with a commonly used term in the title or the abstract                                                                                                                                                                                                                                                                                                                                                                                 | 1       |
|                              |         | (b) Provide in the abstract an informative and balanced summary of what was done and what was found                                                                                                                                                                                                                                                                                                                                                                    | 2, 3    |
| <b>Introduction</b>          |         |                                                                                                                                                                                                                                                                                                                                                                                                                                                                        |         |
| Background/rationale         | 2       | Explain the scientific background and rationale for the investigation being reported                                                                                                                                                                                                                                                                                                                                                                                   | 4       |
| Objectives                   | 3       | State specific objectives, including any prespecified hypotheses                                                                                                                                                                                                                                                                                                                                                                                                       | 5       |
| <b>Methods</b>               |         |                                                                                                                                                                                                                                                                                                                                                                                                                                                                        |         |
| Study design                 | 4       | Present key elements of study design early in the paper                                                                                                                                                                                                                                                                                                                                                                                                                | 5       |
| Setting                      | 5       | Describe the setting, locations, and relevant dates, including periods of recruitment, exposure, follow-up, and data collection                                                                                                                                                                                                                                                                                                                                        | 5       |
| Participants                 | 6       | (a) <i>Cohort study</i> —Give the eligibility criteria, and the sources and methods of selection of participants. Describe methods of follow-up<br><i>Case-control study</i> —Give the eligibility criteria, and the sources and methods of case ascertainment and control selection. Give the rationale for the choice of cases and controls<br><i>Cross-sectional study</i> —Give the eligibility criteria, and the sources and methods of selection of participants | 7       |
|                              |         | (b) <i>Cohort study</i> —For matched studies, give matching criteria and number of exposed and unexposed<br><i>Case-control study</i> —For matched studies, give matching criteria and the number of controls per case                                                                                                                                                                                                                                                 |         |
| Variables                    | 7       | Clearly define all outcomes, exposures, predictors, potential confounders, and effect modifiers. Give diagnostic criteria, if applicable                                                                                                                                                                                                                                                                                                                               | 7       |
| Data sources/<br>measurement | 8*      | For each variable of interest, give sources of data and details of methods of assessment (measurement). Describe comparability of assessment methods if there is more than one group                                                                                                                                                                                                                                                                                   | 7       |
| Bias                         | 9       | Describe any efforts to address potential sources of bias                                                                                                                                                                                                                                                                                                                                                                                                              |         |
| Study size                   | 10      | Explain how the study size was arrived at                                                                                                                                                                                                                                                                                                                                                                                                                              | 6       |
| Quantitative variables       | 11      | Explain how quantitative variables were handled in the analyses. If applicable, describe which groupings were chosen and why                                                                                                                                                                                                                                                                                                                                           | 7       |
| Statistical methods          | 12      | (a) Describe all statistical methods, including those used to control for confounding                                                                                                                                                                                                                                                                                                                                                                                  | 7,8     |
|                              |         | (b) Describe any methods used to examine subgroups and interactions                                                                                                                                                                                                                                                                                                                                                                                                    |         |
|                              |         | (c) Explain how missing data were addressed                                                                                                                                                                                                                                                                                                                                                                                                                            |         |
|                              |         | (d) <i>Cohort study</i> —If applicable, explain how loss to follow-up was addressed<br><i>Case-control study</i> —If applicable, explain how matching of cases and controls was addressed<br><i>Cross-sectional study</i> —If applicable, describe analytical methods taking account of sampling strategy                                                                                                                                                              |         |
|                              |         | (e) Describe any sensitivity analyses                                                                                                                                                                                                                                                                                                                                                                                                                                  |         |

Continued on next page

1  
2  
3  
4  
5  
6  
7  
8  
9  
10  
11  
12  
13  
14  
15  
16  
17  
18  
19  
20  
21  
22  
23  
24  
25  
26  
27  
28  
29  
30  
31  
32  
33  
34  
35  
36  
37  
38  
39  
40  
41  
42  
43  
44  
45  
46  
47  
48  
49  
50  
51  
52  
53  
54  
55  
56  
57  
58  
59  
60**Results**

|                  |     |                                                                                                                                                                                                                                                                                                                                                                                                               |       |
|------------------|-----|---------------------------------------------------------------------------------------------------------------------------------------------------------------------------------------------------------------------------------------------------------------------------------------------------------------------------------------------------------------------------------------------------------------|-------|
| Participants     | 13* | (a) Report numbers of individuals at each stage of study—eg numbers potentially eligible, examined for eligibility, confirmed eligible, included in the study, completing follow-up, and analysed<br>(b) Give reasons for non-participation at each stage<br>(c) Consider use of a flow diagram                                                                                                               | 8     |
| Descriptive data | 14* | (a) Give characteristics of study participants (eg demographic, clinical, social) and information on exposures and potential confounders<br>(b) Indicate number of participants with missing data for each variable of interest<br>(c) <i>Cohort study</i> —Summarise follow-up time (eg, average and total amount)                                                                                           | 8,9   |
| Outcome data     | 15* | <i>Cohort study</i> —Report numbers of outcome events or summary measures over time<br><i>Case-control study</i> —Report numbers in each exposure category, or summary measures of exposure<br><i>Cross-sectional study</i> —Report numbers of outcome events or summary measures                                                                                                                             | 9     |
| Main results     | 16  | (a) Give unadjusted estimates and, if applicable, confounder-adjusted estimates and their precision (eg, 95% confidence interval). Make clear which confounders were adjusted for and why they were included<br>(b) Report category boundaries when continuous variables were categorized<br>(c) If relevant, consider translating estimates of relative risk into absolute risk for a meaningful time period | 10/12 |
| Other analyses   | 17  | Report other analyses done—eg analyses of subgroups and interactions, and sensitivity analyses                                                                                                                                                                                                                                                                                                                |       |

**Discussion**

|                  |    |                                                                                                                                                                            |       |
|------------------|----|----------------------------------------------------------------------------------------------------------------------------------------------------------------------------|-------|
| Key results      | 18 | Summarise key results with reference to study objectives                                                                                                                   | 12/15 |
| Limitations      | 19 | Discuss limitations of the study, taking into account sources of potential bias or imprecision. Discuss both direction and magnitude of any potential bias                 | 15    |
| Interpretation   | 20 | Give a cautious overall interpretation of results considering objectives, limitations, multiplicity of analyses, results from similar studies, and other relevant evidence | 15    |
| Generalisability | 21 | Discuss the generalisability (external validity) of the study results                                                                                                      | 15    |

**Other information**

|         |    |                                                                                                                                                               |  |
|---------|----|---------------------------------------------------------------------------------------------------------------------------------------------------------------|--|
| Funding | 22 | Give the source of funding and the role of the funders for the present study and, if applicable, for the original study on which the present article is based |  |
|---------|----|---------------------------------------------------------------------------------------------------------------------------------------------------------------|--|

\*Give information separately for cases and controls in case-control studies and, if applicable, for exposed and unexposed groups in cohort and cross-sectional studies.

**Note:** An Explanation and Elaboration article discusses each checklist item and gives methodological background and published examples of transparent reporting. The STROBE checklist is best used in conjunction with this article (freely available on the Web sites of PLoS Medicine at <http://www.plosmedicine.org/>, Annals of Internal Medicine at <http://www.annals.org/>, and Epidemiology at <http://www.epidem.com/>). Information on the STROBE Initiative is available at [www.strobe-statement.org](http://www.strobe-statement.org).
