# Supplementary material for: Triple burden of malnutrition among mother–child pairs in low-income and middle-income countries: a cross-sectional study
Source: PubMed Central journal article supplement — BMJ Open. 2023 May 9;13(5):e070978. doi: 10.1136/bmjopen-2022-070978 (PMC10174032; doi:10.1136/bmjopen-2022-070978), 2023-05-09
Supplement: bmjopen-2022-070978.reviewer_comments.pdf [file bmjopen-2022-070978.reviewer_comments.pdf]

## PEER REVIEW HISTORY

BMJ Open publishes all reviews undertaken for accepted manuscripts. Reviewers are asked to complete a checklist review form (<http://bmjopen.bmj.com/site/about/resources/checklist.pdf>) and are provided with free text boxes to elaborate on their assessment. These free text comments are reproduced below.

### ARTICLE DETAILS

|                            |                                                                                                                                     |
|----------------------------|-------------------------------------------------------------------------------------------------------------------------------------|
| <b>TITLE (PROVISIONAL)</b> | Triple burden of malnutrition among mother-child pairs in low and middle-income countries: A cross-sectional study                  |
| <b>AUTHORS</b>             | Chilot, Dagmawi; Belay, Daniel; Merid, Mehari; Kibret, Anteneh; Alem, Adugnaw; Asratie, Melaku; Teshager, Nahom; Aragaw, Fantu Mamo |

### VERSION 1 – REVIEW

|                        |                                                                                                      |
|------------------------|------------------------------------------------------------------------------------------------------|
| <b>REVIEWER</b>        | Huak, Chan<br>Biostatistics Unit, Yong Loo Lin School of Medicine, National University Health System |
| <b>REVIEW RETURNED</b> | 14-Jan-2023                                                                                          |

|                         |                                                                                                                                                                                                                                                                                                                                                                                                                              |
|-------------------------|------------------------------------------------------------------------------------------------------------------------------------------------------------------------------------------------------------------------------------------------------------------------------------------------------------------------------------------------------------------------------------------------------------------------------|
| <b>GENERAL COMMENTS</b> | <p>Thank you for the interesting article.</p> <p>for a better understanding of the statistical analysis performed and the reliability of the results to be obtained</p> <ol style="list-style-type: none"><li>1. kindly explain what which variables were used for the weighting in Table 2</li><li>2. the multi-level cluster (I believe) is the country, suggest that Region should be added on as another level</li></ol> |
|-------------------------|------------------------------------------------------------------------------------------------------------------------------------------------------------------------------------------------------------------------------------------------------------------------------------------------------------------------------------------------------------------------------------------------------------------------------|

|                        |                                                                            |
|------------------------|----------------------------------------------------------------------------|
| <b>REVIEWER</b>        | Khamis, Ahmed Gharib<br>Muhimbili University of Health and Allied Sciences |
| <b>REVIEW RETURNED</b> | 27-Jan-2023                                                                |

|                         |                                                                                                                                                                                                                                                                                                                                                                                                                                                                                                                                                                                                                                                                                                                                                                                                                                                                                                                                                                                                                          |
|-------------------------|--------------------------------------------------------------------------------------------------------------------------------------------------------------------------------------------------------------------------------------------------------------------------------------------------------------------------------------------------------------------------------------------------------------------------------------------------------------------------------------------------------------------------------------------------------------------------------------------------------------------------------------------------------------------------------------------------------------------------------------------------------------------------------------------------------------------------------------------------------------------------------------------------------------------------------------------------------------------------------------------------------------------------|
| <b>GENERAL COMMENTS</b> | <p>Manuscript title: Triple burden of malnutrition among mother-child pairs in low and middle-income countries: In the era of sustainable development goals</p> <p>Title: the word in the era of sustainable development goals, what does that mean?</p> <p><b>GENERAL COMMENTS</b></p> <p>The author have tried to design a research from a secondary data, however, it needs more efforts to make it scientific sound. English language expert is needed to correct the grammar, and flow of the paper.</p> <p><b>COMMENTS</b></p> <p><b>Abstract</b></p> <p>In general, the abstract is not appealing. The objective statement needs to have a brief background statement. This needs to be well organized. Strengths and limitations in the abstract are not important. Also, looking at the triple burden as a composite index is not reality since the interventions cannot be the same for under/over nutrition and micronutrients deficiencies. Hence, generalization of outcome might affect this research.</p> |
|-------------------------|--------------------------------------------------------------------------------------------------------------------------------------------------------------------------------------------------------------------------------------------------------------------------------------------------------------------------------------------------------------------------------------------------------------------------------------------------------------------------------------------------------------------------------------------------------------------------------------------------------------------------------------------------------------------------------------------------------------------------------------------------------------------------------------------------------------------------------------------------------------------------------------------------------------------------------------------------------------------------------------------------------------------------|

|  |                                                                                                                                                                                                                                                                                                                                                                                                                                                                                                                                                                                                                                                                                                                                                                                                                                                                                                                                                                                                                                                                                                                                                                                                                                                                                                                                                                                                                                                                                                                                                                                                                                                                                                                                                                                                                                                                                                                                                                                                                                                                                                                                                                                                                                                                                                                                                                                               |
|--|-----------------------------------------------------------------------------------------------------------------------------------------------------------------------------------------------------------------------------------------------------------------------------------------------------------------------------------------------------------------------------------------------------------------------------------------------------------------------------------------------------------------------------------------------------------------------------------------------------------------------------------------------------------------------------------------------------------------------------------------------------------------------------------------------------------------------------------------------------------------------------------------------------------------------------------------------------------------------------------------------------------------------------------------------------------------------------------------------------------------------------------------------------------------------------------------------------------------------------------------------------------------------------------------------------------------------------------------------------------------------------------------------------------------------------------------------------------------------------------------------------------------------------------------------------------------------------------------------------------------------------------------------------------------------------------------------------------------------------------------------------------------------------------------------------------------------------------------------------------------------------------------------------------------------------------------------------------------------------------------------------------------------------------------------------------------------------------------------------------------------------------------------------------------------------------------------------------------------------------------------------------------------------------------------------------------------------------------------------------------------------------------------|
|  | <p>Line 35: Primary outcome: Your definition of triple burden needs to be briefly shown.</p> <p>Page 3 Line 52: “Conclusion”, remove s<br/>Conclusion should reflect only what the data shows. Example, “Prevention of the problem requires collective efforts from the governments, the scientific and medical communities, and the industry towards changing dietary and lifestyle habits”, it is just a recommendation.</p> <p>Background<br/>The background should show the gaps in research which intended to be filled.</p> <p>Methods<br/>Line 114: Mention the year range, not all fall in 2016.<br/>Line 133-134: More explanation is needed on how did you construct the outcome variable (triple burden). You said that a triple burden is when a mother is overweight/obese and children is undernourished (stunting, wasting, underweight) or anemia. What definition of triple burden did you refer to? And its source.<br/>My questions are does outcome variable combine all burden? What if a mother undernourished? Or mother over nourished while child is undernourished and not anemic? What is for overweight/obese children. I miss the idea behind this construct. Does the outcome variable binary? How did you code the outcome<br/>This is a secondary data analysis, therefore, efforts are needed to explain each step of analysis in details in a way that another researcher can re-produce what you report. This include data cleaning, coding, and analysis.</p> <p>Results<br/>Better you start to show sub-sections in the results, e.g demographic and socioeconomic characteristics etc.<br/>Does not make sense to say statistically positive association with AOR=2.2. Just use the term risk or odds increased/decrease, which is the essence of the logistic regression.<br/>Line 179: Where is a Figure 1.<br/>Which model did you report in the results? Model 1,2 and 3.</p> <p>Discussion<br/>I think having two population in your study affect the flow and general presentation of the discussion. Some paragraphs you explain about children and some mother nutrition status. I recommends you find the best way to discuss your results. The whole section have to be re-arranged for clarity.</p> <p>Conclusion<br/>Conclusion can be specific to what is presented in the paper. The word like “collective effort” can be too broad.</p> |
|--|-----------------------------------------------------------------------------------------------------------------------------------------------------------------------------------------------------------------------------------------------------------------------------------------------------------------------------------------------------------------------------------------------------------------------------------------------------------------------------------------------------------------------------------------------------------------------------------------------------------------------------------------------------------------------------------------------------------------------------------------------------------------------------------------------------------------------------------------------------------------------------------------------------------------------------------------------------------------------------------------------------------------------------------------------------------------------------------------------------------------------------------------------------------------------------------------------------------------------------------------------------------------------------------------------------------------------------------------------------------------------------------------------------------------------------------------------------------------------------------------------------------------------------------------------------------------------------------------------------------------------------------------------------------------------------------------------------------------------------------------------------------------------------------------------------------------------------------------------------------------------------------------------------------------------------------------------------------------------------------------------------------------------------------------------------------------------------------------------------------------------------------------------------------------------------------------------------------------------------------------------------------------------------------------------------------------------------------------------------------------------------------------------|

### VERSION 1 – AUTHOR RESPONSE

REVIEWER: 1 (Dr. Chan Huak)

Thank you for the interesting article.

Re: Thank you very much.

For a better understanding of the statistical analysis performed and the reliability of the results to be obtained

Kindly explain what which variables were used for the weighting in Table 2

Re: Thank you. Now we explain the variables used for weighting.

The multi-level cluster (I believe) is the country, suggest that Region should be added on as another level

Re: Thank you. We managed the variability at the cluster level as the previous study did (<https://journals.plos.org/plosone/article?id=10.1371/journal.pone.0249978>). Specifically, in our case, we have a single country that represents a region (e.g. Haiti-Carrabin, Tajikistan- central Asia) and could be less favorable to manage variability via the region. Therefore, using the cluster level could be better to account for the variability

REVIEWER: 2 (Dr. Ahmed Gharib)

Title: the word in the era of sustainable development goals, what does that means?

Re: Thank you. Now we modified the title.

General comments

The author have tried to design a research from a secondary data, however, it needs more efforts to make it scientific sound. English language expert is needed to correct the grammar, and flow of the paper.

Re: Thank you. Now we carefully revised the language and the flow.

Abstract

In general, the abstract is not appealing. The objective statement needs to have a brief background statement. This needs to be well organized. Strengths and limitations in the abstract are not important. Also, looking at the triple burden as a composite index is not reality since the interventions cannot be the same for under/over nutrition and micronutrients deficiencies. Hence, generalization of outcome might affect this research.

Re: Thank you. The abstract is based on the BMJ Open format, starts from the objective and should include strengths and limitations. Some interventions such as education, media, and health provision could be the same for both under/over nutrition. Although all the interventions for the problem are not the same, the triple burden within a household is becoming increasing and we believe revealing the prevalence and the factors could alarm the stakeholders. Previous studies also assessed it but most of them were country-based (Nepal, India....) Ref 30 & 31 in the manuscript.

Line 35: Primary outcome: Your definition of triple burden needs to be briefly shown.

Re: Thank you. Now we modified it however, because of the nature of the variable it will be incomplete if we make it very brief.

Page 3 Line 52: "Conclusion", remove s

Re: Thank you. Now we removed "S"

Conclusion should reflect only what the data shows. Example, "Prevention of the problem requires collective efforts from the governments, the scientific and medical communities, and the industry towards changing dietary and lifestyle habits", it is just a recommendation.

Re: Thank you. Now we corrected it accordingly (remove the recommendation part)

Background

The background should show the gaps in research which intended to be filled.

Re: Thank you. Now we added the gap

Methods

Line 114: Mention the year range, not all fall in 2016.

Re: Thank you. Now we added the year range

Line 133-134: More explanation is needed on how did you construct the outcome variable (triple burden). You said that a triple burden is when a mother is overweight/obese and children is undernourished (stunting, wasting, underweight) or anemia. What definition of triple burden did you refer to? And its source. My questions are does outcome variable combine all burden? What if a mother undernourished? Or mother over nourished while child is undernourished and not anemic? What is for overweight/obese children. I miss the idea behind this construct.

Re: Thank you. Now we added more explanations and the sources

Does the outcome variable binary? How did you code the outcome

Re: Thank you. It is binary, now we made it clear in the manuscript

This is a secondary data analysis, therefore, efforts are needed to explain each step of analysis in details in a way that another researcher can re-produce what you report. This include data cleaning, coding, and analysis.

Re: Thank you. Now we elaborate on this in the methodology part. As you know the DHS uses the same standard tool & procedure to collect the data and this makes it easier to clean, code and analyze the data.

Results

Better you start to show sub-sections in the results, e.g demographic and socioeconomic characteristics etc.

Re: Thank you. Now we started with subsection

Does not make sense to say statistically positive association with AOR=2.2. Just use the term risk or odds increased/decrease, which is the essence of the logistic regression.

Re: Thank you. Now we correct it accordingly

Line 179: Where is a Figure 1?

Re: Thank you. We attached it separately.

Which model did you report in the results? Model 1, 2 and 3.

Re: Thank you. We reported model 3. We mentioned the best-fitted model was model 3 under “random parameter estimation & model selection”

Discussion

I think having two population in your study affect the flow and general presentation of the discussion. Some paragraphs you explain about children and some mother nutrition status. I recommends you find the best way to discuss your results. The whole section have to be re-arranged for clarity.

Re: Thank you. As you have said the flow might be affected but we had to discuss this based on the evidence. We hope the readers are mindful and focused on the findings and possible justifications we provided. Now we carefully revise the discussion part to make it clear for the readers.

Conclusion

Conclusion can be specific to what is presented in the paper. The word like “collective effort” can be too broad.

Re: Thank you. Now we made it specific.

#### VERSION 2 – REVIEW

|                        |                                                                                                      |
|------------------------|------------------------------------------------------------------------------------------------------|
| <b>REVIEWER</b>        | Huak, Chan<br>Biostatistics Unit, Yong Loo Lin School of Medicine, National University Health System |
| <b>REVIEW RETURNED</b> | 20-Mar-2023                                                                                          |

|                         |                                       |
|-------------------------|---------------------------------------|
| <b>GENERAL COMMENTS</b> | Thank you for refining the manuscript |
|-------------------------|---------------------------------------|
